# Supplementary material for: A multi-omics-based insight to decipher the nano-calcium induced enhanced chickpea (Cicer arietinum) productivity under acidic soil conditions
Source: Research Square preprint supplement (doi:10.21203/rs.3.rs-7170968/v1), 2025-09-12
Supplement: Supplementary file 1 [file 02e5d54e84940ac1fd873104.xlsx]

## Sheet: Sheet1
Supplementary Table S3. Phylum-wise Distribution of Bacteria in the Rhizosphere of chickpea
OTU	Size	Taxonomy	CB	NC_A	PC_A	N50_A	N100_A	N150_A
Otu0001	13295	Bacteria;Bacteria_unclassified;Bacteria_unclassified;Bacteria_unclassified;Bacteria_unclassified;Bacteria_unclassified;	517	784	1101	1739	392	361
Otu0002	6332	Bacteria;Planctomycetota;Planctomycetes;Gemmatales;Gemmataceae;uncultured;	630	548	315	650	538	1319
Otu0003	3151	Bacteria;Proteobacteria;Alphaproteobacteria;Alphaproteobacteria_unclassified;Alphaproteobacteria_unclassified;Alphaproteobacteria_unclassified;	119	300	342	428	174	287
Otu0004	2557	Bacteria;Actinobacteriota;Actinobacteria;Actinobacteria_unclassified;Actinobacteria_unclassified;Actinobacteria_unclassified;	65	161	202	190	84	137
Otu0005	2573	Bacteria;Proteobacteria;Alphaproteobacteria;Rhizobiales;Rhizobiales_unclassified;Rhizobiales_unclassified;	82	223	263	351	113	157
Otu0006	2885	Bacteria;Proteobacteria;Gammaproteobacteria;Gammaproteobacteria_unclassified;Gammaproteobacteria_unclassified;Gammaproteobacteria_unclassified;	181	203	460	341	284	102
Otu0007	8178	Bacteria;Cyanobacteria;Cyanobacteriia;Chloroplast;Chloroplast_fa;Chloroplast;	146	20	17	52	98	8
Otu0008	4880	Bacteria;Planctomycetota;Planctomycetes;Pirellulales;Pirellulaceae;uncultured;	353	732	698	966	305	441
Otu0009	1988	Bacteria;Planctomycetota;Planctomycetes;Gemmatales;Gemmataceae;Gemmataceae_unclassified;	129	126	79	200	138	379
Otu0010	8013	Bacteria;Proteobacteria;Gammaproteobacteria;Burkholderiales;Oxalobacteraceae;Massilia;	1339	1241	241	414	1392	844
Otu0011	2257	Bacteria;Proteobacteria;Alphaproteobacteria;Sphingomonadales;Sphingomonadaceae;Sphingomonadaceae_unclassified;	113	212	253	255	192	126
Otu0012	5266	Bacteria;Actinobacteriota;Actinobacteria;Propionibacteriales;Nocardioidaceae;Nocardioides;	703	807	459	446	375	631
Otu0013	2544	Bacteria;Chloroflexi;Ktedonobacteria;Ktedonobacterales;Ktedonobacteraceae;Ktedonobacteraceae_unclassified;	308	191	96	211	269	381
Otu0014	2526	Bacteria;Proteobacteria;Alphaproteobacteria;Rhizobiales;Xanthobacteraceae;Xanthobacteraceae_unclassified;	167	277	299	274	237	268
Otu0015	5423	Bacteria;Planctomycetota;Planctomycetes;Pirellulales;Pirellulaceae;Pir4_lineage;	361	789	910	1069	376	447
Otu0016	4355	Bacteria;Proteobacteria;Alphaproteobacteria;Rhizobiales;Rhizobiaceae;Rhizobiaceae_unclassified;	222	700	597	557	422	501
Otu0017	1055	Bacteria;Proteobacteria;Gammaproteobacteria;Burkholderiales;Burkholderiales_unclassified;Burkholderiales_unclassified;	35	80	79	135	52	27
Otu0018	1525	Bacteria;Actinobacteriota;Actinobacteria;Micrococcales;Intrasporangiaceae;Intrasporangiaceae_unclassified;	48	251	77	89	53	321
Otu0019	3048	Bacteria;Actinobacteriota;Thermoleophilia;Solirubrobacterales;67-14;67-14;	363	552	414	247	233	143
Otu0020	2269	Bacteria;Acidobacteriota;Vicinamibacteria;Vicinamibacterales;uncultured;uncultured;	279	425	362	181	261	194
Otu0021	1996	Bacteria;Planctomycetota;Phycisphaerae;Tepidisphaerales;WD2101_soil_group;WD2101_soil_group;	210	182	167	270	118	257
Otu0022	4526	Bacteria;Chloroflexi;Anaerolineae;Anaerolineales;Anaerolineaceae;uncultured;	398	407	797	599	329	466
Otu0023	2916	Bacteria;Chloroflexi;Chloroflexia;Thermomicrobiales;JG30-KF-CM45;JG30-KF-CM45;	238	659	403	299	186	313
Otu0024	4003	Bacteria;Bacteroidota;Bacteroidia;Flavobacteriales;Flavobacteriaceae;Flavobacterium;	622	216	404	339	108	20
Otu0025	3022	Bacteria;Chloroflexi;Anaerolineae;SBR1031;A4b;A4b;	304	416	353	308	222	317
Otu0026	1280	Bacteria;Planctomycetota;Planctomycetes;Pirellulales;Pirellulaceae;Pirellulaceae_unclassified;	51	110	217	196	61	103
Otu0027	1259	Bacteria;Planctomycetota;Planctomycetes;Isosphaerales;Isosphaeraceae;uncultured;	71	222	200	137	114	97
Otu0028	1777	Bacteria;Actinobacteriota;Thermoleophilia;Solirubrobacterales;Solirubrobacteraceae;Conexibacter;	176	224	211	109	233	111
Otu0029	2568	Bacteria;Chloroflexi;Anaerolineae;Caldilineales;Caldilineaceae;uncultured;	288	508	359	304	154	311
Otu0030	828	Bacteria;Actinobacteriota;Actinobacteria;Micrococcales;Micrococcales_unclassified;Micrococcales_unclassified;	18	81	59	107	14	40
Otu0031	736	Bacteria;Actinobacteriota;Actinobacteriota_unclassified;Actinobacteriota_unclassified;Actinobacteriota_unclassified;Actinobacteriota_unclassified;	12	67	52	77	14	15
Otu0032	2130	Bacteria;Acidobacteriota;Vicinamibacteria;Vicinamibacterales;Vicinamibacteraceae;Vicinamibacteraceae;	293	570	254	196	162	181
Otu0033	1789	Bacteria;Planctomycetota;Planctomycetes;Planctomycetales;uncultured;uncultured;	158	245	193	342	116	166
Otu0034	5441	Bacteria;Proteobacteria;Alphaproteobacteria;Sphingomonadales;Sphingomonadaceae;Sphingomonas;	666	691	318	491	729	545
Otu0035	1355	Bacteria;Bacteroidota;Bacteroidia;Chitinophagales;Chitinophagaceae;Chitinophagaceae_unclassified;	190	177	126	149	70	15
Otu0036	2313	Bacteria;Planctomycetota;Planctomycetes;Pirellulales;Pirellulaceae;Pirellula;	238	306	334	466	140	214
Otu0037	980	Bacteria;Proteobacteria;Gammaproteobacteria;Burkholderiales;Comamonadaceae;Comamonadaceae_unclassified;	67	107	129	114	100	82
Otu0038	2513	Bacteria;Acidobacteriota;Acidobacteriae;Bryobacterales;Bryobacteraceae;Bryobacter;	308	342	282	300	360	200
Otu0039	1045	Bacteria;Planctomycetota;Planctomycetes;Isosphaerales;Isosphaeraceae;Isosphaeraceae_unclassified;	61	166	120	125	80	96
Otu0040	758	Bacteria;Proteobacteria;Gammaproteobacteria;Burkholderiales;Oxalobacteraceae;Oxalobacteraceae_unclassified;	69	90	14	56	61	54
Otu0041	1579	Bacteria;Actinobacteriota;Thermoleophilia;Gaiellales;uncultured;uncultured;	131	224	208	122	220	92
Otu0042	1510	Bacteria;Actinobacteriota;Actinobacteria;Micromonosporales;Micromonosporaceae;Micromonosporaceae_unclassified;	144	185	155	168	87	151
Otu0043	869	Bacteria;Proteobacteria;Gammaproteobacteria;Xanthomonadales;Xanthomonadaceae;Xanthomonadaceae_unclassified;	72	54	87	107	31	75
Otu0044	1001	Bacteria;Planctomycetota;Planctomycetes;Gemmatales;Gemmataceae;Gemmata;	88	135	90	115	86	203
Otu0045	755	Bacteria;Chloroflexi;Chloroflexi_unclassified;Chloroflexi_unclassified;Chloroflexi_unclassified;Chloroflexi_unclassified;	55	78	59	84	49	78
Otu0046	2930	Bacteria;Bacteroidota;Bacteroidia;Sphingobacteriales;Sphingobacteriaceae;Sphingobacterium;	469	289	128	392	295	24
Otu0047	1367	Bacteria;Chloroflexi;TK10;TK10_or;TK10_fa;TK10;	135	248	102	97	179	212
Otu0048	1103	Bacteria;Patescibacteria;Saccharimonadia;Saccharimonadales;Saccharimonadales_unclassified;Saccharimonadales_unclassified;	97	119	180	129	88	75
Otu0049	1280	Bacteria;Patescibacteria;Saccharimonadia;Saccharimonadales;LWQ8;LWQ8;	144	171	143	181	84	89
Otu0050	1497	Bacteria;Firmicutes;Clostridia;Lachnospirales;Lachnospiraceae;Lachnospiraceae_unclassified;	141	197	168	122	259	120
Otu0051	654	Bacteria;Bacteroidota;Bacteroidia;Bacteroidia_unclassified;Bacteroidia_unclassified;Bacteroidia_unclassified;	13	22	80	86	50	2
Otu0052	2332	Bacteria;Chloroflexi;Anaerolineae;Anaerolineales;Anaerolineaceae;Anaerolinea;	201	194	330	339	237	125
Otu0053	1020	Bacteria;Verrucomicrobiota;Chlamydiae;Chlamydiales;Chlamydiales_unclassified;Chlamydiales_unclassified;	92	138	153	180	44	15
Otu0054	1594	Bacteria;Acidobacteriota;Acidobacteriae;Acidobacteriales;Acidobacteriales_unclassified;Acidobacteriales_unclassified;	221	133	69	112	256	128
Otu0055	2470	Bacteria;Actinobacteriota;Actinobacteria;Corynebacteriales;Mycobacteriaceae;Mycobacterium;	182	285	244	163	269	488
Otu0056	2247	Bacteria;Chloroflexi;KD4-96;KD4-96_or;KD4-96_fa;KD4-96;	224	441	330	251	181	310
Otu0057	1319	Bacteria;Acidobacteriota;Acidobacteriae;Solibacterales;Solibacteraceae;Candidatus_Solibacter;	172	171	137	159	206	68
Otu0058	1255	Bacteria;Myxococcota;Polyangia;Haliangiales;Haliangiaceae;Haliangium;	95	206	311	141	130	84
Otu0059	1374	Bacteria;Chloroflexi;Anaerolineae;Anaerolineales;Anaerolineaceae;Anaerolineaceae_unclassified;	141	90	204	193	93	73
Otu0060	670	Bacteria;Bdellovibrionota;Oligoflexia;0319-6G20;0319-6G20_fa;0319-6G20;	112	75	99	62	84	27
Otu0061	743	Bacteria;Actinobacteriota;Actinobacteria;Propionibacteriales;Nocardioidaceae;Nocardioidaceae_unclassified;	47	67	51	74	40	66
Otu0062	504	Bacteria;Proteobacteria;Proteobacteria_unclassified;Proteobacteria_unclassified;Proteobacteria_unclassified;Proteobacteria_unclassified;	4	37	43	73	16	8
Otu0063	1217	Bacteria;Proteobacteria;Alphaproteobacteria;Rhizobiales;Devosiaceae;Devosiaceae_unclassified;	95	190	166	149	105	142
Otu0064	596	Bacteria;Acidobacteriota;Acidobacteriae;Acidobacteriae_unclassified;Acidobacteriae_unclassified;Acidobacteriae_unclassified;	29	43	56	75	30	38
Otu0065	1141	Bacteria;Patescibacteria;Saccharimonadia;Saccharimonadales;Saccharimonadales_fa;Saccharimonadales;	121	105	218	144	98	138
Otu0066	1094	Bacteria;Actinobacteriota;Actinobacteria;Frankiales;Acidothermaceae;Acidothermus;	105	93	60	109	204	182
Otu0067	1536	Bacteria;Acidobacteriota;Acidobacteriae;Acidobacteriales;uncultured;uncultured;	192	151	96	133	337	172
Otu0068	1746	Bacteria;Myxococcota;Polyangia;Polyangiales;Sandaracinaceae;uncultured;	159	191	389	203	161	81
Otu0069	919	Bacteria;Proteobacteria;Gammaproteobacteria;Legionellales;Legionellaceae;Legionella;	87	114	241	80	96	29
Otu0070	2575	Bacteria;Bacteroidota;Bacteroidia;Cytophagales;Microscillaceae;uncultured;	191	340	366	532	334	64
Otu0071	588	Bacteria;Bdellovibrionota;Bdellovibrionia;Bdellovibrionales;Bdellovibrionaceae;Bdellovibrio;	68	55	119	69	50	31
Otu0072	1354	Bacteria;Gemmatimonadota;Gemmatimonadetes;Gemmatimonadales;Gemmatimonadaceae;uncultured;	122	153	247	126	136	245
Otu0073	924	Bacteria;Verrucomicrobiota;Chlamydiae;Chlamydiales;Parachlamydiaceae;Parachlamydiaceae_unclassified;	97	96	99	115	45	6
Otu0074	758	Bacteria;Chloroflexi;Ktedonobacteria;B12-WMSP1;B12-WMSP1_fa;B12-WMSP1;	89	96	49	56	91	74
Otu0075	571	Bacteria;Actinobacteriota;Thermoleophilia;Solirubrobacterales;Solirubrobacteraceae;Solirubrobacteraceae_unclassified;	48	66	47	47	59	23
Otu0076	1766	Bacteria;Myxococcota;Polyangia;Polyangiales;BIrii41;BIrii41;	164	308	250	271	169	127
Otu0077	1843	Bacteria;Chloroflexi;Anaerolineae;SBR1031;SBR1031_fa;SBR1031;	162	213	338	133	288	122
Otu0078	1679	Bacteria;Firmicutes;Bacilli;Bacillales;Bacillaceae;Bacillus;	287	193	90	95	254	30
Otu0079	1083	Bacteria;Actinobacteriota;Acidimicrobiia;IMCC26256;IMCC26256_fa;IMCC26256;	94	218	133	86	132	121
Otu0080	2783	Bacteria;Proteobacteria;Alphaproteobacteria;Rhizobiales;Xanthobacteraceae;uncultured;	325	444	250	252	333	366
Otu0081	975	Bacteria;Bacteroidota;Bacteroidia;Sphingobacteriales;Sphingobacteriaceae;Sphingobacteriaceae_unclassified;	82	52	162	171	45	9
Otu0082	919	Bacteria;Proteobacteria;Alphaproteobacteria;Elsterales;uncultured;uncultured;	83	96	70	83	164	139
Otu0083	649	Bacteria;Actinobacteriota;Actinobacteria;Streptomycetales;Streptomycetaceae;Streptomycetaceae_unclassified;	30	31	49	29	101	56
Otu0084	690	Bacteria;Gemmatimonadota;Gemmatimonadetes;Gemmatimonadales;Gemmatimonadaceae;Gemmatimonadaceae_unclassified;	74	99	59	36	52	65
Otu0085	1455	Bacteria;Planctomycetota;Planctomycetes;Planctomycetales;Rubinisphaeraceae;Planctomicrobium;	89	182	240	260	88	226
Otu0086	2064	Bacteria;Proteobacteria;Gammaproteobacteria;Gammaproteobacteria_Incertae_Sedis;Unknown_Family;Acidibacter;	177	373	328	240	257	127
Otu0087	2181	Bacteria;Bacteroidota;Bacteroidia;Bacteroidales;Bacteroidetes_vadinHA17;Bacteroidetes_vadinHA17;	49	36	809	296	302	7
Otu0088	1507	Bacteria;Actinobacteriota;Actinobacteria;Propionibacteriales;Nocardioidaceae;Marmoricola;	247	214	89	108	93	264
Otu0089	1305	Bacteria;Planctomycetota;Planctomycetes;Planctomycetales;Rubinisphaeraceae;SH-PL14;	75	190	171	263	61	141
Otu0090	549	Bacteria;Chloroflexi;Ktedonobacteria;Ktedonobacterales;Ktedonobacteraceae;FCPS473;	79	30	18	31	73	69
Otu0091	1028	Bacteria;Planctomycetota;Phycisphaerae;Phycisphaerales;Phycisphaeraceae;SM1A02;	62	108	122	186	54	114
Otu0092	779	Bacteria;Dependentiae;Babeliae;Babeliales;Babeliales_unclassified;Babeliales_unclassified;	106	128	88	90	112	18
Otu0093	637	Bacteria;Proteobacteria;Gammaproteobacteria;Diplorickettsiales;Diplorickettsiaceae;Aquicella;	93	89	95	71	63	68
Otu0094	710	Bacteria;Verrucomicrobiota;Verrucomicrobiae;Pedosphaerales;Pedosphaeraceae;Pedosphaeraceae;	123	95	72	79	73	26
Otu0095	526	Bacteria;Proteobacteria;Alphaproteobacteria;Acetobacterales;Acetobacteraceae;Acetobacteraceae_unclassified;	45	74	36	67	56	93
Otu0096	602	Bacteria;Actinobacteriota;Actinobacteria;Micrococcales;Microbacteriaceae;Microbacteriaceae_unclassified;	30	117	128	73	32	31
Otu0097	485	Bacteria;Actinobacteriota;Thermoleophilia;Gaiellales;Gaiellales_unclassified;Gaiellales_unclassified;	28	76	42	36	64	28
Otu0098	2086	Bacteria;Proteobacteria;Gammaproteobacteria;Pseudomonadales;Pseudomonadaceae;Pseudomonas;	118	100	214	143	169	79
Otu0099	315	Bacteria;Planctomycetota;Planctomycetes;Planctomycetes_unclassified;Planctomycetes_unclassified;Planctomycetes_unclassified;	5	18	12	43	0	6
Otu0100	817	Bacteria;Acidobacteriota;Thermoanaerobaculia;Thermoanaerobaculales;Thermoanaerobaculaceae;Subgroup_10;	145	104	105	76	89	83
Otu0101	762	Bacteria;Chloroflexi;AD3;AD3_or;AD3_fa;AD3;	74	56	29	63	65	170
Otu0102	500	Bacteria;Myxococcota;Polyangia;Polyangiales;Polyangiaceae;Pajaroellobacter;	48	68	85	49	81	25
Otu0103	899	Bacteria;WPS-2;WPS-2_cl;WPS-2_or;WPS-2_fa;WPS-2;	82	47	49	69	142	205
Otu0104	714	Bacteria;Chloroflexi;Ktedonobacteria;Ktedonobacterales;JG30-KF-AS9;JG30-KF-AS9;	72	91	56	57	90	109
Otu0105	1632	Bacteria;Actinobacteriota;Actinobacteria;Streptomycetales;Streptomycetaceae;Streptomyces;	191	142	147	87	135	99
Otu0106	1871	Bacteria;Proteobacteria;Gammaproteobacteria;Steroidobacterales;Steroidobacteraceae;Steroidobacter;	178	381	257	282	180	68
Otu0107	477	Bacteria;Armatimonadota;Chthonomonadetes;Chthonomonadales;Chthonomonadaceae;Chthonomonas;	85	56	26	32	105	33
Otu0108	2316	Bacteria;Bacteroidota;Bacteroidia;Cytophagales;Microscillaceae;Chryseolinea;	217	334	375	359	150	143
Otu0109	691	Bacteria;Proteobacteria;Alphaproteobacteria;Rhodobacterales;Rhodobacteraceae;Rhodobacteraceae_unclassified;	51	156	116	89	74	62
Otu0110	476	Bacteria;Actinobacteriota;Acidimicrobiia;Microtrichales;Microtrichales_unclassified;Microtrichales_unclassified;	33	93	131	50	21	29
Otu0111	1202	Bacteria;Proteobacteria;Gammaproteobacteria;R7C24;R7C24_fa;R7C24;	74	194	277	208	114	29
Otu0112	820	Bacteria;Bacteroidota;Bacteroidia;Chitinophagales;Chitinophagaceae;Edaphobaculum;	114	68	84	65	51	7
Otu0113	914	Bacteria;Firmicutes;Clostridia;Peptostreptococcales-Tissierellales;Peptostreptococcaceae;Peptostreptococcaceae_unclassified;	49	117	68	114	194	80
Otu0114	687	Bacteria;Actinobacteriota;Thermoleophilia;Solirubrobacterales;Solirubrobacteraceae;Solirubrobacter;	72	111	81	89	75	24
Otu0115	750	Bacteria;Proteobacteria;Gammaproteobacteria;Burkholderiales;SC-I-84;SC-I-84;	52	129	152	73	77	79
Otu0116	536	Bacteria;Chloroflexi;Ktedonobacteria;Ktedonobacterales;Ktedonobacteraceae;HSB_OF53-F07;	35	61	21	32	33	116
Otu0117	659	Bacteria;Planctomycetota;Planctomycetes;Isosphaerales;Isosphaeraceae;Aquisphaera;	40	98	84	64	79	51
Otu0118	1170	Bacteria;Proteobacteria;Alphaproteobacteria;Reyranellales;Reyranellaceae;Reyranella;	67	200	109	153	233	93
Otu0119	1068	Bacteria;Bacteroidota;Bacteroidia;Chitinophagales;Chitinophagaceae;Flavisolibacter;	377	125	43	93	62	17
Otu0120	714	Bacteria;Dependentiae;Babeliae;Babeliales;Vermiphilaceae;Vermiphilaceae;	87	111	223	85	43	7
Otu0121	1975	Bacteria;Proteobacteria;Gammaproteobacteria;Xanthomonadales;Xanthomonadaceae;Pseudoxanthomonas;	285	331	195	197	122	40
Otu0122	693	Bacteria;Proteobacteria;Alphaproteobacteria;Rickettsiales;Mitochondria;Mitochondria;	30	2	4	15	2	0
Otu0123	1414	Bacteria;Proteobacteria;Alphaproteobacteria;Rhizobiales;Hyphomicrobiaceae;Pedomicrobium;	176	244	159	120	140	211
Otu0124	1272	Bacteria;Actinobacteriota;Acidimicrobiia;Microtrichales;uncultured;uncultured;	148	322	225	126	99	108
Otu0125	289	Bacteria;Chloroflexi;Anaerolineae;Anaerolineae_unclassified;Anaerolineae_unclassified;Anaerolineae_unclassified;	22	19	20	37	10	21
Otu0126	371	Bacteria;Actinobacteriota;Actinobacteria;Micrococcales;Micrococcaceae;Micrococcaceae_unclassified;	31	60	18	23	33	21
Otu0127	1083	Bacteria;Proteobacteria;Alphaproteobacteria;Caulobacterales;Hyphomonadaceae;SWB02;	91	174	174	189	103	91
Otu0128	1510	Bacteria;Bacteroidota;Bacteroidia;Chitinophagales;Chitinophagaceae;Terrimonas;	197	240	218	229	135	27
Otu0129	614	Bacteria;Firmicutes;Bacilli;Bacillales;Bacillaceae;Bacillaceae_unclassified;	93	103	43	45	93	15
Otu0130	486	Bacteria;Chloroflexi;Ktedonobacteria;Ktedonobacterales;Ktedonobacteraceae;uncultured;	46	70	19	48	69	94
Otu0131	2060	Bacteria;Bacteroidota;Bacteroidia;Bacteroidales;Marinilabiliaceae;Ruminofilibacter;	16	26	225	85	1472	9
Otu0132	847	Bacteria;Chloroflexi;Chloroflexia;Thermomicrobiales;AKYG1722;AKYG1722;	95	191	87	80	44	150
Otu0133	265	Bacteria;Firmicutes;Clostridia;Clostridia_unclassified;Clostridia_unclassified;Clostridia_unclassified;	14	25	40	32	36	10
Otu0134	1355	Bacteria;Proteobacteria;Gammaproteobacteria;Xanthomonadales;Xanthomonadaceae;Luteimonas;	101	141	232	121	139	54
Otu0135	275	Bacteria;Firmicutes;Clostridia;Clostridiales;Clostridiaceae;Clostridiaceae_unclassified;	18	26	31	43	26	18
Otu0136	421	Bacteria;Myxococcota;Polyangia;Polyangiales;Polyangiaceae;Polyangiaceae_unclassified;	35	54	66	60	62	36
Otu0137	351	Bacteria;Cyanobacteria;Cyanobacteriia;Cyanobacteriia_unclassified;Cyanobacteriia_unclassified;Cyanobacteriia_unclassified;	27	3	2	76	9	4
Otu0138	554	Bacteria;Proteobacteria;Alphaproteobacteria;Rhizobiales;Hyphomicrobiaceae;Hyphomicrobiaceae_unclassified;	42	50	75	55	30	78
Otu0139	779	Bacteria;Bacteroidota;Bacteroidia;Sphingobacteriales;Sphingobacteriaceae;Mucilaginibacter;	116	109	32	89	40	30
Otu0140	256	Bacteria;Proteobacteria;Gammaproteobacteria;Steroidobacterales;Steroidobacteraceae;Steroidobacteraceae_unclassified;	6	38	34	56	14	10
Otu0141	572	Bacteria;Proteobacteria;Gammaproteobacteria;Burkholderiales;Nitrosomonadaceae;MND1;	44	86	121	27	81	79
Otu0142	247	Bacteria;Proteobacteria;Gammaproteobacteria;Pseudomonadales;Pseudomonadaceae;Pseudomonadaceae_unclassified;	4	11	23	14	4	7
Otu0143	472	Bacteria;Gemmatimonadota;Gemmatimonadetes;Gemmatimonadales;Gemmatimonadaceae;Gemmatimonas;	62	51	36	40	48	55
Otu0144	499	Bacteria;Proteobacteria;Gammaproteobacteria;Burkholderiales;Nitrosomonadaceae;Ellin6067;	57	81	56	46	70	28
Otu0145	577	Bacteria;Actinobacteriota;Acidimicrobiia;Microtrichales;Iamiaceae;Iamia;	50	114	88	78	40	51
Otu0146	656	Bacteria;Proteobacteria;Alphaproteobacteria;Caulobacterales;Caulobacteraceae;Caulobacteraceae_unclassified;	53	69	103	61	106	39
Otu0147	225	Bacteria;Actinobacteriota;Thermoleophilia;Thermoleophilia_unclassified;Thermoleophilia_unclassified;Thermoleophilia_unclassified;	6	18	19	33	7	15
Otu0148	971	Bacteria;Fibrobacterota;Fibrobacteria;Fibrobacterales;Fibrobacterales_fa;BBMC-4;	105	123	183	118	140	14
Otu0149	365	Bacteria;Proteobacteria;Alphaproteobacteria;Rhizobiales;Beijerinckiaceae;Beijerinckiaceae_unclassified;	26	35	56	44	28	39
Otu0150	393	Bacteria;Actinobacteriota;Thermoleophilia;Solirubrobacterales;Solirubrobacterales_unclassified;Solirubrobacterales_unclassified;	35	63	43	42	24	27
Otu0151	380	Bacteria;Planctomycetota;OM190;OM190_or;OM190_fa;OM190;	25	50	61	67	17	59
Otu0152	1664	Bacteria;Bacteroidota;Bacteroidia;Bacteroidales;SB-5;SB-5;	57	38	210	132	937	7
Otu0153	493	Bacteria;Proteobacteria;Gammaproteobacteria;Diplorickettsiales;Diplorickettsiaceae;uncultured;	44	78	77	69	50	42
Otu0154	282	Bacteria;Actinobacteriota;Acidimicrobiia;Acidimicrobiia_unclassified;Acidimicrobiia_unclassified;Acidimicrobiia_unclassified;	16	41	30	36	22	25
Otu0155	297	Bacteria;Bdellovibrionota;Oligoflexia;Oligoflexales;uncultured;uncultured;	20	39	72	29	39	4
Otu0156	242	Bacteria;Planctomycetota;Planctomycetes;Gemmatales;Gemmataceae;Gemmataceae;	11	6	5	16	14	22
Otu0157	246	Bacteria;Firmicutes;Clostridia;Clostridia_or;Hungateiclostridiaceae;Hungateiclostridiaceae_unclassified;	18	24	47	32	26	7
Otu0158	775	Bacteria;Proteobacteria;Gammaproteobacteria;CCD24;CCD24_fa;CCD24;	64	136	115	69	70	122
Otu0159	579	Bacteria;Actinobacteriota;Actinobacteria;Frankiales;Frankiaceae;Jatrophihabitans;	66	39	51	33	87	106
Otu0160	1249	Bacteria;Proteobacteria;Alphaproteobacteria;Rhizobiales;Hyphomicrobiaceae;Hyphomicrobium;	123	202	168	122	117	163
Otu0161	725	Bacteria;Proteobacteria;Alphaproteobacteria;Rhizobiales;Beijerinckiaceae;Microvirga;	76	89	86	72	87	106
Otu0162	591	Bacteria;Chloroflexi;Anaerolineae;Ardenticatenales;uncultured;uncultured;	83	79	65	52	61	85
Otu0163	584	Bacteria;Bacteroidota;Bacteroidia;Chitinophagales;Chitinophagaceae;Taibaiella;	45	43	68	62	43	3
Otu0164	313	Bacteria;Firmicutes;Clostridia;Christensenellales;Christensenellaceae;Christensenellaceae_R-7_group;	10	19	84	21	50	16
Otu0165	718	Bacteria;Chloroflexi;OLB14;OLB14_or;OLB14_fa;OLB14;	81	102	171	63	46	67
Otu0166	317	Bacteria;Chloroflexi;Ktedonobacteria;Ktedonobacterales;Ktedonobacteraceae;1921-3;	28	27	10	16	46	57
Otu0167	1256	Bacteria;Proteobacteria;Gammaproteobacteria;Xanthomonadales;Xanthomonadaceae;Thermomonas;	80	103	250	96	90	30
Otu0168	257	Bacteria;Firmicutes;Bacilli;Bacillales;Bacillales_unclassified;Bacillales_unclassified;	39	26	16	13	26	8
Otu0169	413	Bacteria;Chloroflexi;Dehalococcoidia;S085;S085_fa;S085;	43	80	55	37	35	48
Otu0170	680	Bacteria;Bacteroidota;Bacteroidia;Sphingobacteriales;env.OPS_17;env.OPS_17;	98	37	142	82	30	13
Otu0171	354	Bacteria;Verrucomicrobiota;Verrucomicrobiae;Pedosphaerales;Pedosphaeraceae;ADurb.Bin063-1;	38	36	31	76	55	14
Otu0172	393	Bacteria;Chloroflexi;JG30-KF-CM66;JG30-KF-CM66_or;JG30-KF-CM66_fa;JG30-KF-CM66;	29	67	67	26	31	52
Otu0173	531	Bacteria;Gemmatimonadota;S0134_terrestrial_group;S0134_terrestrial_group_or;S0134_terrestrial_group_fa;S0134_terrestrial_group;	74	87	107	27	38	50
Otu0174	313	Bacteria;Myxococcota;Myxococcia;Myxococcales;Anaeromyxobacteraceae;Anaeromyxobacter;	40	44	30	31	58	14
Otu0175	1384	Bacteria;Actinobacteriota;Acidimicrobiia;Actinomarinales;uncultured;uncultured;	181	425	255	74	121	115
Otu0176	500	Bacteria;Planctomycetota;Planctomycetes;Gemmatales;Gemmataceae;Fimbriiglobus;	44	73	40	101	42	84
Otu0177	397	Bacteria;Acidobacteriota;Blastocatellia;Blastocatellales;Blastocatellaceae;Blastocatellaceae_unclassified;	33	45	35	60	29	69
Otu0178	1070	Bacteria;Bacteroidota;Bacteroidia;Sphingobacteriales;Sphingobacteriaceae;Pedobacter;	84	76	101	226	105	5
Otu0179	352	Bacteria;Bacteroidota;Bacteroidia;Flavobacteriales;Flavobacteriaceae;Flavobacteriaceae_unclassified;	28	44	33	59	6	4
Otu0180	1327	Bacteria;Actinobacteriota;Acidimicrobiia;Microtrichales;Ilumatobacteraceae;Ilumatobacter;	67	324	302	204	76	100
Otu0181	289	Bacteria;Proteobacteria;Gammaproteobacteria;Xanthomonadales;Xanthomonadales_unclassified;Xanthomonadales_unclassified;	5	18	38	38	49	11
Otu0182	204	Bacteria;Planctomycetota;Planctomycetes;Planctomycetales;Planctomycetales_unclassified;Planctomycetales_unclassified;	15	24	18	26	8	15
Otu0183	804	Bacteria;Actinobacteriota;Acidimicrobiia;Microtrichales;Ilumatobacteraceae;uncultured;	80	254	95	91	44	59
Otu0184	1091	Bacteria;Bacteroidota;Bacteroidia;Cytophagales;Microscillaceae;Ohtaekwangia;	74	150	154	295	55	24
Otu0185	238	Bacteria;Verrucomicrobiota;Verrucomicrobiae;Pedosphaerales;Pedosphaeraceae;Pedosphaeraceae_unclassified;	19	27	39	34	26	7
Otu0186	986	Bacteria;Proteobacteria;Alphaproteobacteria;Dongiales;Dongiaceae;Dongia;	47	97	122	138	142	161
Otu0187	287	Bacteria;Myxococcota;Myxococcia;Myxococcales;Myxococcaceae;Myxococcaceae_unclassified;	42	36	20	47	58	8
Otu0188	450	Bacteria;Acidobacteriota;Vicinamibacteria;Vicinamibacterales;Vicinamibacteraceae;Luteitalea;	32	89	67	68	25	58
Otu0189	435	Bacteria;Desulfobacterota;uncultured;uncultured_or;uncultured_fa;uncultured;	32	83	74	45	72	36
Otu0190	304	Bacteria;Patescibacteria;Dojkabacteria;Dojkabacteria_or;Dojkabacteria_fa;Dojkabacteria;	22	41	77	39	14	2
Otu0191	933	Bacteria;Proteobacteria;Alphaproteobacteria;Caulobacterales;Caulobacteraceae;Phenylobacterium;	78	127	173	102	130	58
Otu0192	305	Bacteria;Myxococcota;Polyangia;Polyangiales;Polyangiales_unclassified;Polyangiales_unclassified;	19	84	27	34	18	15
Otu0193	597	Bacteria;Proteobacteria;Alphaproteobacteria;Rhizobiales;Rhizobiales_Incertae_Sedis;Bauldia;	62	101	88	61	49	84
Otu0194	482	Bacteria;Firmicutes;Clostridia;Lachnospirales;Lachnospiraceae;Cellulosilyticum;	64	40	51	41	89	30
Otu0195	364	Bacteria;Chloroflexi;Chloroflexia;Chloroflexales;Roseiflexaceae;uncultured;	28	61	18	25	52	48
Otu0196	1413	Bacteria;Firmicutes;Clostridia;Clostridiales;Clostridiaceae;Clostridium_sensu_stricto_1;	167	143	143	111	254	114
Otu0197	288	Bacteria;Planctomycetota;Phycisphaerae;Pla1_lineage;Pla1_lineage_fa;Pla1_lineage;	16	30	69	48	20	6
Otu0198	269	Bacteria;Acidobacteriota;Holophagae;Subgroup_7;Subgroup_7_fa;Subgroup_7;	26	24	27	32	47	16
Otu0199	303	Bacteria;Verrucomicrobiota;Verrucomicrobiae;Chthoniobacterales;Chthoniobacteraceae;Chthoniobacter;	56	39	27	40	17	5
Otu0200	404	Bacteria;Proteobacteria;Gammaproteobacteria;Burkholderiales;TRA3-20;TRA3-20;	57	89	63	27	45	17
Otu0201	267	Bacteria;Actinobacteriota;Acidimicrobiia;Microtrichales;Ilumatobacteraceae;Ilumatobacteraceae_unclassified;	12	34	58	32	5	21
Otu0202	162	Bacteria;Firmicutes;Firmicutes_unclassified;Firmicutes_unclassified;Firmicutes_unclassified;Firmicutes_unclassified;	13	16	26	26	3	8
Otu0203	1056	Bacteria;Bacteroidota;Bacteroidia;Flavobacteriales;Weeksellaceae;Chryseobacterium;	182	123	68	97	68	7
Otu0204	220	Bacteria;Actinobacteriota;Actinobacteria;Frankiales;Frankiales_unclassified;Frankiales_unclassified;	9	22	19	17	20	40
Otu0205	685	Bacteria;Chloroflexi;Anaerolineae;Anaerolineales;Anaerolineaceae;UTCFX1;	101	86	59	94	81	35
Otu0206	849	Bacteria;Proteobacteria;Gammaproteobacteria;Xanthomonadales;Xanthomonadaceae;Lysobacter;	124	147	51	105	59	24
Otu0207	1057	Bacteria;Proteobacteria;Alphaproteobacteria;Rhizobiales;Methyloligellaceae;uncultured;	192	145	67	69	135	115
Otu0208	217	Bacteria;Patescibacteria;Parcubacteria;Candidatus_Kaiserbacteria;Candidatus_Kaiserbacteria_fa;Candidatus_Kaiserbacteria;	22	22	40	20	16	5
Otu0209	313	Bacteria;Firmicutes;Clostridia;Clostridia_or;Hungateiclostridiaceae;Ruminiclostridium;	38	44	80	21	25	14
Otu0210	315	Bacteria;Patescibacteria;Microgenomatia;Candidatus_Pacebacteria;Candidatus_Pacebacteria_fa;Candidatus_Pacebacteria;	30	32	106	53	16	2
Otu0211	163	Bacteria;Acidobacteriota;Vicinamibacteria;Vicinamibacterales;Vicinamibacterales_unclassified;Vicinamibacterales_unclassified;	11	16	21	26	15	18
Otu0212	151	Bacteria;Actinobacteriota;Actinobacteria;Corynebacteriales;Corynebacteriales_unclassified;Corynebacteriales_unclassified;	2	12	8	21	6	8
Otu0213	939	Bacteria;Proteobacteria;Gammaproteobacteria;Xanthomonadales;Xanthomonadaceae;Stenotrophomonas;	170	153	87	87	70	9
Otu0214	401	Bacteria;Planctomycetota;Planctomycetes;Planctomycetales;Schlesneriaceae;Planctopirus;	25	68	73	52	28	43
Otu0215	611	Bacteria;Planctomycetota;Planctomycetes;Pirellulales;Pirellulaceae;Blastopirellula;	45	95	69	98	37	81
Otu0216	609	Bacteria;Proteobacteria;Alphaproteobacteria;uncultured;uncultured_fa;uncultured;	43	95	56	47	77	108
Otu0217	147	Bacteria;Actinobacteriota;Actinobacteria;Propionibacteriales;Propionibacteriales_unclassified;Propionibacteriales_unclassified;	3	6	7	20	3	6
Otu0218	423	Bacteria;Proteobacteria;Alphaproteobacteria;Micropepsales;Micropepsaceae;uncultured;	34	45	36	47	68	31
Otu0219	465	Bacteria;Proteobacteria;Gammaproteobacteria;Burkholderiales;Comamonadaceae;Ramlibacter;	76	69	55	45	60	60
Otu0220	523	Bacteria;Chloroflexi;Gitt-GS-136;Gitt-GS-136_or;Gitt-GS-136_fa;Gitt-GS-136;	79	110	60	36	44	67
Otu0221	448	Bacteria;Proteobacteria;Gammaproteobacteria;Burkholderiales;Burkholderiaceae;Burkholderia-Caballeronia-Paraburkholderia;	51	72	19	26	92	56
Otu0222	447	Bacteria;Proteobacteria;Gammaproteobacteria;Xanthomonadales;Rhodanobacteraceae;Rhodanobacteraceae_unclassified;	44	32	37	43	54	33
Otu0223	408	Bacteria;NB1-j;NB1-j_cl;NB1-j_or;NB1-j_fa;NB1-j;	37	75	67	48	35	61
Otu0224	884	Bacteria;Actinobacteriota;Actinobacteria;Streptosporangiales;Thermomonosporaceae;Actinomadura;	88	58	92	82	74	54
Otu0225	192	Bacteria;Firmicutes;Bacilli;Paenibacillales;Paenibacillaceae;Paenibacillus;	40	19	14	12	33	7
Otu0226	693	Bacteria;Nitrospirota;Nitrospiria;Nitrospirales;Nitrospiraceae;Nitrospira;	106	91	112	68	57	31
Otu0227	293	Bacteria;Proteobacteria;Alphaproteobacteria;Rhizobiales;Xanthobacteraceae;Rhodoplanes;	36	46	28	20	41	31
Otu0228	189	Bacteria;Firmicutes;Bacilli;Bacillales;Planococcaceae;Planococcaceae_unclassified;	19	37	28	29	13	3
Otu0229	800	Archaea;Euryarchaeota;Methanobacteria;Methanobacteriales;Methanobacteriaceae;Methanobacterium;	45	41	127	121	43	3
Otu0230	149	Bacteria;Firmicutes;Bacilli;Bacilli_unclassified;Bacilli_unclassified;Bacilli_unclassified;	15	10	9	14	9	4
Otu0231	274	Bacteria;Bacteroidota;Bacteroidia;Cytophagales;Microscillaceae;Microscillaceae_unclassified;	25	38	26	53	7	10
Otu0232	972	Bacteria;Proteobacteria;Alphaproteobacteria;Sphingomonadales;Sphingomonadaceae;Altererythrobacter;	67	143	149	115	135	98
Otu0233	166	Bacteria;Actinobacteriota;Actinobacteria;Streptosporangiales;Thermomonosporaceae;Thermomonosporaceae_unclassified;	5	12	20	25	7	17
Otu0234	503	Bacteria;Verrucomicrobiota;Verrucomicrobiae;Chthoniobacterales;Chthoniobacteraceae;Candidatus_Udaeobacter;	52	53	31	63	89	25
Otu0235	389	Bacteria;Acidobacteriota;Acidobacteriae;Acidobacteriales;Acidobacteriaceae_(Subgroup_1);Acidobacteriaceae_(Subgroup_1)_unclassified;	44	37	30	42	73	30
Otu0236	375	Bacteria;Actinobacteriota;Thermoleophilia;Gaiellales;Gaiellaceae;Gaiella;	51	82	48	41	49	22
Otu0237	1055	Bacteria;Actinobacteriota;Actinobacteria;Micrococcales;Intrasporangiaceae;Terrabacter;	95	159	50	54	131	291
Otu0238	1408	Bacteria;Proteobacteria;Alphaproteobacteria;Rhizobiales;Devosiaceae;Devosia;	93	269	212	186	133	127
Otu0239	393	Bacteria;Verrucomicrobiota;Chlamydiae;Chlamydiales;Parachlamydiaceae;Neochlamydia;	40	50	47	80	24	1
Otu0240	251	Bacteria;Firmicutes;Limnochordia;Limnochordia_or;Limnochordia_fa;Hydrogenispora;	31	26	53	13	33	29
Otu0241	1352	Bacteria;Proteobacteria;Gammaproteobacteria;Burkholderiales;Burkholderiaceae;Ralstonia;	23	154	77	72	877	54
Otu0242	794	Bacteria;Proteobacteria;Gammaproteobacteria;Methylococcales;Methylococcaceae;Methylocaldum;	63	87	98	36	53	130
Otu0243	929	Bacteria;Proteobacteria;Alphaproteobacteria;Rhizobiales;Amb-16S-1323;Amb-16S-1323;	83	137	197	62	48	93
Otu0244	611	Bacteria;Proteobacteria;Alphaproteobacteria;Caulobacterales;Hyphomonadaceae;Hirschia;	48	73	79	82	65	109
Otu0245	166	Bacteria;Patescibacteria;Parcubacteria;Parcubacteria_unclassified;Parcubacteria_unclassified;Parcubacteria_unclassified;	13	8	38	26	17	5
Otu0246	643	Bacteria;Actinobacteriota;Actinobacteria;Micrococcales;Cellulomonadaceae;Actinotalea;	42	95	127	62	27	115
Otu0247	901	Archaea;Halobacterota;Methanosarcinia;Methanosarciniales;Methanosarcinaceae;Methanosarcina;	83	152	90	193	58	14
Otu0248	313	Bacteria;Patescibacteria;Saccharimonadia;Saccharimonadales;Saccharimonadaceae;TM7a;	22	27	38	40	33	16
Otu0249	172	Bacteria;Planctomycetota;Phycisphaerae;Phycisphaerales;Phycisphaeraceae;uncultured;	11	15	41	26	5	19
Otu0250	183	Bacteria;Gemmatimonadota;Longimicrobia;Longimicrobiales;Longimicrobiaceae;Longimicrobiaceae;	22	35	24	24	11	15
Otu0251	146	Bacteria;Armatimonadota;uncultured;uncultured_or;uncultured_fa;uncultured;	12	25	24	8	31	7
Otu0252	304	Bacteria;Chloroflexi;Ktedonobacteria;C0119;C0119_fa;C0119;	55	34	20	37	40	21
Otu0253	291	Archaea;Crenarchaeota;Bathyarchaeia;Bathyarchaeia_or;Bathyarchaeia_fa;Bathyarchaeia;	19	14	48	42	10	33
Otu0254	146	Bacteria;Actinobacteriota;Actinobacteria;Pseudonocardiales;Pseudonocardiaceae;Pseudonocardiaceae_unclassified;	7	11	7	14	11	8
Otu0255	357	Bacteria;Planctomycetota;Planctomycetes;uncultured;uncultured_fa;uncultured;	21	51	61	65	11	58
Otu0256	160	Bacteria;Bdellovibrionota;Bdellovibrionia;Bacteriovoracales;Bacteriovoracaceae;Peredibacter;	26	9	30	11	14	0
Otu0257	522	Bacteria;Proteobacteria;Alphaproteobacteria;Sphingomonadales;Sphingomonadaceae;Novosphingobium;	19	40	128	60	71	10
Otu0258	630	Bacteria;Proteobacteria;Alphaproteobacteria;Caulobacterales;Caulobacteraceae;Brevundimonas;	158	143	27	35	95	33
Otu0259	336	Bacteria;Myxococcota;Polyangia;Nannocystales;Nannocystaceae;Nannocystis;	35	38	54	55	26	23
Otu0260	2036	Bacteria;Proteobacteria;Alphaproteobacteria;Rhizobiales;Rhizobiaceae;Allorhizobium-Neorhizobium-Pararhizobium-Rhizobium;	113	232	191	165	917	94
Otu0261	354	Bacteria;Proteobacteria;Gammaproteobacteria;Burkholderiales;Burkholderiaceae;Limnobacter;	28	38	122	28	18	31
Otu0262	540	Bacteria;Proteobacteria;Gammaproteobacteria;PLTA13;PLTA13_fa;PLTA13;	65	95	126	42	41	50
Otu0263	269	Bacteria;Firmicutes;Clostridia;Christensenellales;Christensenellaceae;uncultured;	7	10	81	11	75	12
Otu0264	157	Bacteria;Verrucomicrobiota;Verrucomicrobiae;Opitutales;Opitutaceae;Opitutaceae_unclassified;	11	15	18	27	4	2
Otu0265	616	Bacteria;Bacteroidota;Bacteroidia;Chitinophagales;Saprospiraceae;uncultured;	35	51	162	152	27	2
Otu0266	2269	Bacteria;Firmicutes;Clostridia;Peptostreptococcales-Tissierellales;Peptostreptococcaceae;Romboutsia;	221	329	231	220	392	216
Otu0267	260	Bacteria;Firmicutes;Clostridia;Lachnospirales;Lachnospiraceae;Lachnospiraceae_NK3A20_group;	8	24	146	13	19	17
Otu0268	906	Archaea;Halobacterota;Methanosarcinia;Methanosarciniales;Methanosaetaceae;Methanosaeta;	18	26	232	242	35	9
Otu0269	117	Bacteria;Planctomycetota;Planctomycetota_unclassified;Planctomycetota_unclassified;Planctomycetota_unclassified;Planctomycetota_unclassified;	4	7	18	15	9	5
Otu0270	361	Bacteria;Actinobacteriota;Actinobacteria;Frankiales;Geodermatophilaceae;Geodermatophilus;	31	33	35	30	60	66
Otu0271	180	Bacteria;Verrucomicrobiota;Verrucomicrobiae;Verrucomicrobiales;Rubritaleaceae;Luteolibacter;	25	29	29	33	5	3
Otu0272	446	Bacteria;Actinobacteriota;Actinobacteria;Micrococcales;Micrococcaceae;Sinomonas;	60	70	26	18	52	49
Otu0273	280	Bacteria;Chloroflexi;Anaerolineae;RBG-13-54-9;RBG-13-54-9_fa;RBG-13-54-9;	34	22	51	28	14	38
Otu0274	202	Bacteria;Chloroflexi;Anaerolineae;SJA-15;SJA-15_fa;SJA-15;	16	21	27	34	28	22
Otu0275	176	Bacteria;Hydrogenedentes;Hydrogenedentia;Hydrogenedentiales;Hydrogenedensaceae;Hydrogenedensaceae;	11	9	50	20	17	9
Otu0276	607	Bacteria;Actinobacteriota;Actinobacteria;Micrococcales;Microbacteriaceae;Agromyces;	78	136	90	60	58	66
Otu0277	257	Bacteria;Firmicutes;Bacilli;Alicyclobacillales;Alicyclobacillaceae;Tumebacillus;	63	26	11	10	40	8
Otu0278	394	Bacteria;Proteobacteria;Gammaproteobacteria;Pseudomonadales;Moraxellaceae;Acinetobacter;	31	26	18	53	134	7
Otu0279	300	Bacteria;Myxococcota;Polyangia;Polyangiales;Sandaracinaceae;Sandaracinus;	27	19	76	29	18	14
Otu0280	187	Bacteria;Actinobacteriota;Actinobacteria;Frankiales;Geodermatophilaceae;Geodermatophilaceae_unclassified;	14	25	13	13	35	24
Otu0281	170	Bacteria;Gemmatimonadota;BD2-11_terrestrial_group;BD2-11_terrestrial_group_or;BD2-11_terrestrial_group_fa;BD2-11_terrestrial_group;	24	26	44	16	12	10
Otu0282	244	Bacteria;Verrucomicrobiota;Chlamydiae;Chlamydiales;Parachlamydiaceae;Candidatus_Protochlamydia;	37	22	35	38	16	4
Otu0283	163	Bacteria;Cyanobacteria;Vampirivibrionia;Gastranaerophilales;Gastranaerophilales_fa;Gastranaerophilales;	11	18	36	23	13	10
Otu0284	258	Bacteria;Verrucomicrobiota;Chlamydiae;Chlamydiales;cvE6;cvE6;	13	16	115	25	17	5
Otu0285	411	Bacteria;Bacteroidota;Bacteroidia;Chitinophagales;Chitinophagaceae;Niastella;	92	56	45	23	55	12
Otu0286	226	Bacteria;Proteobacteria;Alphaproteobacteria;Caulobacterales;Caulobacteraceae;uncultured;	19	25	17	21	55	23
Otu0287	1082	Bacteria;Actinobacteriota;Actinobacteria;Micrococcales;Intrasporangiaceae;Lapillicoccus;	68	67	68	37	168	252
Otu0288	199	Bacteria;Proteobacteria;Gammaproteobacteria;Methylococcales;Methylococcaceae;Methylococcaceae_unclassified;	11	12	23	27	14	36
Otu0289	449	Bacteria;Bacteroidota;Bacteroidia;Chitinophagales;Chitinophagaceae;uncultured;	34	31	106	70	28	5
Otu0290	315	Bacteria;Actinobacteriota;Actinobacteria;Propionibacteriales;Nocardioidaceae;Aeromicrobium;	19	33	42	36	17	26
Otu0291	182	Bacteria;Planctomycetota;Planctomycetes;Pirellulales;Pirellulaceae;Rhodopirellula;	30	24	21	33	12	18
Otu0292	189	Bacteria;Bacteroidota;Bacteroidia;Bacteroidales;Bacteroidales_unclassified;Bacteroidales_unclassified;	9	3	67	16	9	1
Otu0293	136	Bacteria;Armatimonadota;Fimbriimonadia;Fimbriimonadales;Fimbriimonadaceae;Fimbriimonadaceae;	16	18	11	21	18	9
Otu0294	211	Bacteria;Proteobacteria;Gammaproteobacteria;Coxiellales;Coxiellaceae;Coxiella;	46	19	21	34	12	5
Otu0295	816	Bacteria;Firmicutes;Bacilli;Erysipelotrichales;Erysipelotrichaceae;Turicibacter;	90	115	87	114	125	11
Otu0296	255	Bacteria;Verrucomicrobiota;Verrucomicrobiae;Chthoniobacterales;Terrimicrobiaceae;Terrimicrobium;	16	47	31	62	14	11
Otu0297	217	Bacteria;Verrucomicrobiota;Verrucomicrobiae;Opitutales;Opitutaceae;Opitutus;	47	33	15	31	11	10
Otu0298	556	Bacteria;Proteobacteria;Gammaproteobacteria;Xanthomonadales;Rhodanobacteraceae;Dokdonella;	32	112	104	65	39	41
Otu0299	875	Bacteria;Proteobacteria;Alphaproteobacteria;Sphingomonadales;Sphingomonadaceae;Sphingopyxis;	86	113	121	72	64	35
Otu0300	308	Bacteria;Bacteroidota;Bacteroidia;Cytophagales;Spirosomaceae;Dyadobacter;	33	29	13	28	93	4
Otu0301	309	Bacteria;Proteobacteria;Gammaproteobacteria;Steroidobacterales;Steroidobacteraceae;uncultured;	36	43	75	52	19	16
Otu0302	131	Bacteria;Proteobacteria;Alphaproteobacteria;Micavibrionales;uncultured;uncultured;	13	18	31	15	9	6
Otu0303	386	Bacteria;Proteobacteria;Gammaproteobacteria;Xanthomonadales;Xanthomonadaceae;Arenimonas;	27	33	114	44	32	16
Otu0304	431	Bacteria;Proteobacteria;Alphaproteobacteria;Acetobacterales;Acetobacteraceae;Roseomonas;	22	73	71	83	31	50
Otu0305	202	Bacteria;Planctomycetota;Planctomycetes;Isosphaerales;Isosphaeraceae;Singulisphaera;	22	30	16	17	26	24
Otu0306	137	Bacteria;Proteobacteria;Alphaproteobacteria;Rhizobiales;Methyloligellaceae;Methyloligellaceae_unclassified;	24	15	6	7	9	7
Otu0307	360	Bacteria;Myxococcota;Polyangia;Polyangiales;Polyangiaceae;Polyangium;	31	56	30	43	54	62
Otu0308	117	Bacteria;Firmicutes;Clostridia;Peptostreptococcales-Tissierellales;Peptostreptococcales-Tissierellales_unclassified;Peptostreptococcales-Tissierellales_unclassified;	5	18	14	16	5	10
Otu0310	677	Bacteria;Proteobacteria;Alphaproteobacteria;Rhizobiales;Xanthobacteraceae;Pseudorhodoplanes;	48	140	88	78	78	50
Otu0311	432	Bacteria;Bacteroidota;Bacteroidia;Cytophagales;Hymenobacteraceae;Pontibacter;	144	157	10	37	19	2
Otu0312	161	Bacteria;Proteobacteria;Alphaproteobacteria;Rhodospirillales;uncultured;uncultured;	17	12	26	13	21	11
Otu0313	253	Bacteria;Bacteroidota;Bacteroidia;Flavobacteriales;NS9_marine_group;NS9_marine_group;	23	43	57	36	21	7
Otu0314	119	Bacteria;Firmicutes;Bacilli;Paenibacillales;Paenibacillaceae;Paenibacillaceae_unclassified;	22	21	11	3	15	3
Otu0315	143	Bacteria;Proteobacteria;Gammaproteobacteria;Methylococcales;Methylomonadaceae;Methylomonadaceae_unclassified;	18	5	52	17	8	2
Otu0316	117	Bacteria;Proteobacteria;Alphaproteobacteria;Elsterales;Elsterales_unclassified;Elsterales_unclassified;	11	4	9	8	17	12
Otu0317	446	Bacteria;Proteobacteria;Gammaproteobacteria;Burkholderiales;Comamonadaceae;Hydrogenophaga;	13	19	131	33	85	8
Otu0318	124	Bacteria;Firmicutes;Clostridia;Peptostreptococcales-Tissierellales;Anaerovoracaceae;Family_XIII_AD3011_group;	2	19	51	9	6	8
Otu0319	242	Bacteria;Myxococcota;Polyangia;Nannocystales;Nannocystaceae;Nannocystaceae_unclassified;	11	25	14	28	67	10
Otu0320	220	Bacteria;Actinobacteriota;Acidimicrobiia;Microtrichales;Microtrichaceae;IMCC26207;	11	55	52	17	15	10
Otu0321	189	Bacteria;Verrucomicrobiota;Verrucomicrobiae;Opitutales;Opitutaceae;Lacunisphaera;	30	26	19	28	15	1
Otu0322	186	Bacteria;Bacteroidota;Bacteroidia;Chitinophagales;Chitinophagaceae;Chitinophaga;	39	8	5	8	7	2
Otu0323	131	Bacteria;Actinobacteriota;Coriobacteriia;OPB41;OPB41_fa;OPB41;	13	6	23	18	6	7
Otu0324	761	Bacteria;Proteobacteria;Alphaproteobacteria;Rhizobiales;Rhizobiaceae;Aminobacter;	61	109	83	145	63	76
Otu0325	302	Bacteria;Proteobacteria;Alphaproteobacteria;Sphingomonadales;Sphingomonadaceae;Ellin6055;	43	56	30	37	31	21
Otu0326	211	Bacteria;Deinococcota;Deinococci;Deinococcales;Trueperaceae;Truepera;	20	14	42	19	10	53
Otu0327	285	Bacteria;Proteobacteria;Gammaproteobacteria;Burkholderiales;Nitrosomonadaceae;mle1-7;	23	84	43	19	15	46
Otu0328	156	Bacteria;Patescibacteria;Parcubacteria;Candidatus_Moranbacteria;Candidatus_Moranbacteria_fa;Candidatus_Moranbacteria;	8	11	21	63	8	4
Otu0329	105	Bacteria;Bacteroidota;Ignavibacteria;Ignavibacteriales;Ignavibacteriales_unclassified;Ignavibacteriales_unclassified;	8	8	19	27	12	2
Otu0330	114	Bacteria;Proteobacteria;Gammaproteobacteria;Burkholderiales;Rhodocyclaceae;Rhodocyclaceae_unclassified;	4	14	28	7	23	3
Otu0331	596	Bacteria;Proteobacteria;Alphaproteobacteria;Rhizobiales;Xanthobacteraceae;Pseudolabrys;	56	53	93	65	100	43
Otu0332	105	Bacteria;Cyanobacteria;Sericytochromatia;Sericytochromatia_or;Sericytochromatia_fa;Sericytochromatia;	14	12	6	12	10	4
Otu0333	288	Bacteria;Bacteroidota;Bacteroidia;Cytophagales;Hymenobacteraceae;Adhaeribacter;	111	59	9	15	7	8
Otu0334	121	Bacteria;Chloroflexi;Ktedonobacteria;Ktedonobacterales;Ktedonobacteraceae;Ktedonobacter;	19	14	15	11	5	10
Otu0335	123	Bacteria;Patescibacteria;Microgenomatia;Candidatus_Woesebacteria;Candidatus_Woesebacteria_fa;Candidatus_Woesebacteria;	21	14	23	14	14	1
Otu0336	99	Bacteria;Elusimicrobiota;Lineage_IIa;Lineage_IIa_or;Lineage_IIa_fa;Lineage_IIa;	12	15	8	12	21	3
Otu0337	157	Bacteria;Acidobacteriota;Acidobacteriae;Subgroup_2;Subgroup_2_fa;Subgroup_2;	5	15	13	23	42	26
Otu0338	143	Bacteria;Actinobacteriota;Actinobacteria;Streptosporangiales;Streptosporangiaceae;Streptosporangiaceae_unclassified;	3	10	16	21	9	2
Otu0339	113	Bacteria;Sumerlaeota;Sumerlaeia;Sumerlaeales;Sumerlaeaceae;Sumerlaea;	7	15	26	22	10	2
Otu0340	141	Bacteria;Firmicutes;Clostridia;Oscillospirales;Oscillospiraceae;Oscillospiraceae_unclassified;	11	8	33	12	19	8
Otu0341	221	Bacteria;Proteobacteria;Alphaproteobacteria;Rhizobiales;Beijerinckiaceae;Methylobacterium-Methylorubrum;	22	62	13	23	40	21
Otu0342	250	Bacteria;Proteobacteria;Gammaproteobacteria;CCM19a;CCM19a_fa;CCM19a;	21	62	58	26	14	41
Otu0343	337	Bacteria;Planctomycetota;Phycisphaerae;Phycisphaerales;Phycisphaeraceae;AKYG587;	23	39	28	40	20	92
Otu0344	182	Bacteria;Firmicutes;Syntrophomonadia;Syntrophomonadales;Syntrophomonadaceae;Syntrophomonas;	19	16	56	10	16	6
Otu0345	120	Bacteria;Cyanobacteria;Vampirivibrionia;Obscuribacterales;Obscuribacteraceae;Obscuribacteraceae;	15	13	7	12	13	18
Otu0346	583	Bacteria;Firmicutes;Bacilli;Bacillales;Planococcaceae;Lysinibacillus;	80	112	60	67	74	16
Otu0347	324	Bacteria;Chloroflexi;Chloroflexia;Chloroflexales;Chloroflexales_unclassified;Chloroflexales_unclassified;	22	48	21	105	33	17
Otu0348	90	Bacteria;Verrucomicrobiota;Verrucomicrobiae;Verrucomicrobiae_unclassified;Verrucomicrobiae_unclassified;Verrucomicrobiae_unclassified;	7	13	11	9	2	5
Otu0349	223	Bacteria;Desulfobacterota;Syntrophorhabdia;Syntrophorhabdales;Syntrophorhabdaceae;Syntrophorhabdus;	18	11	82	34	21	1
Otu0350	236	Bacteria;Spirochaetota;Spirochaetia;Spirochaetales;Spirochaetaceae;Treponema;	0	1	50	11	81	1
Otu0351	428	Bacteria;Bacteroidota;Bacteroidia;Flavobacteriales;Crocinitomicaceae;Fluviicola;	10	2	89	14	2	1
Otu0352	193	Bacteria;Acidobacteriota;Acidobacteriae;Acidobacteriales;Koribacteraceae;Candidatus_Koribacter;	23	13	24	13	44	19
Otu0353	96	Bacteria;Armatimonadota;Armatimonadia;Armatimonadales;Armatimonadales_fa;Armatimonadales;	13	11	7	5	24	10
Otu0354	153	Bacteria;Proteobacteria;Gammaproteobacteria;Burkholderiales;Burkholderiaceae;Lautropia;	10	24	27	4	20	15
Otu0355	182	Bacteria;Desulfobacterota;Syntrophia;Syntrophales;Smithellaceae;Smithella;	2	4	64	24	2	2
Otu0356	167	Bacteria;Desulfobacterota;Syntrophia;Syntrophales;Syntrophaceae;Syntrophus;	2	2	57	26	7	1
Otu0357	147	Bacteria;Actinobacteriota;Acidimicrobiia;Actinomarinales;Actinomarinales_unclassified;Actinomarinales_unclassified;	12	19	22	15	10	20
Otu0358	481	Bacteria;Chloroflexi;Anaerolineae;Anaerolineales;Anaerolineaceae;Leptolinea;	16	18	133	87	26	0
Otu0359	150	Bacteria;Proteobacteria;Alphaproteobacteria;Tistrellales;Geminicoccaceae;Candidatus_Alysiosphaera;	18	31	14	10	19	14
Otu0360	114	Bacteria;Actinobacteriota;Thermoleophilia;Solirubrobacterales;Solirubrobacteraceae;uncultured;	13	12	14	6	26	5
Otu0361	127	Bacteria;Bacteroidota;Bacteroidia;Sphingobacteriales;Sphingobacteriales_unclassified;Sphingobacteriales_unclassified;	11	6	19	16	8	0
Otu0362	306	Archaea;Euryarchaeota;Methanobacteria;Methanobacteriales;Methanobacteriaceae;Methanobrevibacter;	24	23	27	47	8	1
Otu0363	205	Bacteria;Patescibacteria;Saccharimonadia;Saccharimonadales;S32;TM7;	26	21	18	36	23	36
Otu0364	411	Bacteria;Proteobacteria;Gammaproteobacteria;Methylococcales;Methylomonadaceae;Methylobacter;	68	50	61	53	59	9
Otu0365	172	Bacteria;Chloroflexi;Ktedonobacteria;Ktedonobacterales;Ktedonobacteraceae;1921-2;	15	17	9	8	27	27
Otu0366	152	Bacteria;Planctomycetota;Planctomycetes;Planctomycetales;Rubinisphaeraceae;Rubinisphaeraceae_unclassified;	10	14	19	34	9	20
Otu0367	118	Bacteria;Acidobacteriota;Vicinamibacteria;Subgroup_17;Subgroup_17_fa;Subgroup_17;	5	28	10	25	14	9
Otu0368	79	Bacteria;Verrucomicrobiota;Kiritimatiellae;WCHB1-41;WCHB1-41_fa;WCHB1-41;	1	2	35	9	6	0
Otu0369	143	Bacteria;Firmicutes;Clostridia;Clostridia_or;Hungateiclostridiaceae;HN-HF0106;	11	11	33	10	28	10
Otu0370	116	Bacteria;Planctomycetota;Phycisphaerae;MSBL9;SG8-4;SG8-4;	4	8	26	32	5	2
Otu0371	102	Bacteria;Armatimonadota;Chthonomonadetes;Chthonomonadales;Chthonomonadales_fa;Chthonomonadales;	16	8	13	7	21	2
Otu0372	126	Bacteria;Firmicutes;Clostridia;Peptostreptococcales-Tissierellales;Sedimentibacteraceae;Sedimentibacter;	7	16	28	10	3	5
Otu0373	216	Bacteria;Proteobacteria;Gammaproteobacteria;Burkholderiales;Sutterellaceae;uncultured;	15	32	65	20	19	15
Otu0374	147	Bacteria;Acidobacteriota;Blastocatellia;11-24;11-24_fa;11-24;	39	27	8	11	19	10
Otu0375	283	Bacteria;Acidobacteriota;Blastocatellia;Blastocatellales;Blastocatellaceae;Stenotrophobacter;	25	31	47	39	21	21
Otu0376	81	Bacteria;Proteobacteria;Alphaproteobacteria;Rhodospirillales;Rhodospirillaceae;uncultured;	14	5	10	5	10	11
Otu0377	281	Bacteria;Actinobacteriota;Actinobacteria;Kineosporiales;Kineosporiaceae;Kineosporiaceae_unclassified;	25	50	38	40	26	27
Otu0378	156	Bacteria;Proteobacteria;Alphaproteobacteria;Sphingomonadales;Sphingomonadaceae;Sphingobium;	10	17	26	24	23	3
Otu0379	171	Bacteria;Proteobacteria;Gammaproteobacteria;Pseudomonadales;Moraxellaceae;uncultured;	4	23	56	16	26	10
Otu0380	265	Bacteria;Actinobacteriota;Actinobacteria;Propionibacteriales;Nocardioidaceae;Kribbella;	16	16	18	7	53	23
Otu0381	277	Bacteria;Latescibacterota;Latescibacterota_cl;Latescibacterota_or;Latescibacterota_fa;Latescibacterota;	9	12	177	25	16	12
Otu0382	107	Bacteria;Myxococcota;Polyangia;Polyangiales;Phaselicystidaceae;Phaselicystis;	8	18	11	15	11	8
Otu0383	101	Bacteria;Acidobacteriota;Subgroup_5;Subgroup_5_or;Subgroup_5_fa;Subgroup_5;	19	12	12	8	19	6
Otu0384	331	Bacteria;Actinobacteriota;Actinobacteria;Micrococcales;Microbacteriaceae;Microbacterium;	39	131	63	10	16	3
Otu0385	127	Bacteria;Proteobacteria;Gammaproteobacteria;Burkholderiales;Alcaligenaceae;Alcaligenaceae_unclassified;	11	18	17	7	7	3
Otu0386	242	Bacteria;Bacteroidota;Bacteroidia;Chitinophagales;Chitinophagaceae;Arachidicoccus;	11	2	9	11	36	1
Otu0387	112	Bacteria;Bacteroidota;Bacteroidia;Chitinophagales;Chitinophagaceae;Puia;	14	12	6	7	31	3
Otu0388	96	Bacteria;Acidobacteriota;Blastocatellia;Pyrinomonadales;Pyrinomonadaceae;RB41;	9	22	4	5	19	7
Otu0389	60	Bacteria;Gemmatimonadota;Gemmatimonadetes;Gemmatimonadales;Gemmatimonadaceae;Gemmatimonadaceae;	2	1	4	4	0	0
Otu0390	103	Bacteria;MBNT15;MBNT15_cl;MBNT15_or;MBNT15_fa;MBNT15;	13	24	13	9	6	11
Otu0391	62	Bacteria;Myxococcota;Polyangia;Polyangia_unclassified;Polyangia_unclassified;Polyangia_unclassified;	5	10	11	11	6	4
Otu0392	87	Bacteria;Actinobacteriota;Acidimicrobiia;uncultured;uncultured_fa;uncultured;	8	10	5	9	5	16
Otu0393	237	Bacteria;Proteobacteria;Alphaproteobacteria;Reyranellales;Reyranellaceae;uncultured;	16	38	49	23	18	34
Otu0394	118	Bacteria;Verrucomicrobiota;Verrucomicrobiae;Opitutales;Opitutaceae;Alterococcus;	8	19	22	15	6	7
Otu0395	110	Bacteria;Chloroflexi;Anaerolineae;SBR1031;SBR1031_unclassified;SBR1031_unclassified;	11	16	19	18	12	4
Otu0396	59	Bacteria;Bacteroidota;Bacteroidia;Cytophagales;Cytophagales_unclassified;Cytophagales_unclassified;	4	8	4	8	3	3
Otu0397	154	Bacteria;Proteobacteria;Alphaproteobacteria;Defluviicoccales;Defluviicoccaceae;Defluviicoccus;	22	48	7	5	16	40
Otu0398	145	Bacteria;Desulfobacterota;Syntrophobacteria;Syntrophobacterales;Syntrophobacteraceae;Syntrophobacteraceae_unclassified;	22	29	18	16	12	3
Otu0399	140	Bacteria;Firmicutes;Clostridia;Clostridia_or;Gracilibacteraceae;Gracilibacter;	18	8	41	7	20	5
Otu0400	746	Bacteria;Proteobacteria;Alphaproteobacteria;Rhizobiales;Rhizobiaceae;Mesorhizobium;	43	105	75	92	83	55
Otu0401	132	Bacteria;Actinobacteriota;Actinobacteria;Micromonosporales;Micromonosporaceae;Longispora;	8	40	9	3	7	5
Otu0402	427	Bacteria;Actinobacteriota;Actinobacteria;Pseudonocardiales;Pseudonocardiaceae;Saccharomonospora;	5	11	3	2	4	375
Otu0403	179	Bacteria;Acidobacteriota;Subgroup_18;Subgroup_18_or;Subgroup_18_fa;Subgroup_18;	8	9	67	15	37	7
Otu0404	200	Bacteria;Proteobacteria;Gammaproteobacteria;Xanthomonadales;Rhodanobacteraceae;Dyella;	7	6	24	8	14	16
Otu0405	208	Bacteria;Bacteroidota;Ignavibacteria;Ignavibacteriales;Ignavibacteriaceae;Ignavibacterium;	9	6	22	63	40	2
Otu0406	1371	Bacteria;Proteobacteria;Alphaproteobacteria;Rhizobiales;Xanthobacteraceae;Bradyrhizobium;	144	170	117	123	279	158
Otu0407	64	Bacteria;Proteobacteria;Alphaproteobacteria;Rickettsiales;SM2D12;SM2D12;	6	8	7	9	13	5
Otu0408	441	Bacteria;Proteobacteria;Alphaproteobacteria;Kiloniellales;Kiloniellaceae;Pelagibius;	31	43	242	33	13	46
Otu0409	59	Bacteria;Planctomycetota;Phycisphaerae;Tepidisphaerales;Tepidisphaerales_unclassified;Tepidisphaerales_unclassified;	3	2	3	1	0	0
Otu0410	67	Bacteria;Myxococcota;Polyangia;mle1-27;mle1-27_fa;mle1-27;	6	7	6	7	19	5
Otu0411	101	Bacteria;Proteobacteria;Alphaproteobacteria;Rhizobiales;Labraceae;Labrys;	7	15	9	8	11	17
Otu0412	118	Bacteria;Actinobacteriota;Actinobacteria;Micrococcales;Microbacteriaceae;Leucobacter;	4	24	24	15	7	7
Otu0413	55	Bacteria;Chloroflexi;Ktedonobacteria;Ktedonobacteria_unclassified;Ktedonobacteria_unclassified;Ktedonobacteria_unclassified;	1	3	1	2	2	2
Otu0414	166	Bacteria;Actinobacteriota;Acidimicrobiia;Microtrichales;Microtrichaceae;uncultured;	12	33	33	15	18	23
Otu0415	106	Bacteria;Planctomycetota;Phycisphaerae;Phycisphaerae_unclassified;Phycisphaerae_unclassified;Phycisphaerae_unclassified;	5	8	32	17	8	7
Otu0416	153	Bacteria;Verrucomicrobiota;Verrucomicrobiae;Pedosphaerales;Pedosphaeraceae;Oikopleura;	15	42	14	22	14	3
Otu0417	573	Bacteria;Proteobacteria;Gammaproteobacteria;Burkholderiales;Methylophilaceae;UBA6140;	21	22	191	45	167	6
Otu0418	93	Bacteria;Bdellovibrionota;Bdellovibrionia;Bdellovibrionales;Bdellovibrionaceae;OM27_clade;	8	12	14	15	5	8
Otu0419	69	Bacteria;Myxococcota;Polyangia;Blfdi19;Blfdi19_fa;Blfdi19;	9	6	10	6	4	10
Otu0420	65	Bacteria;Planctomycetota;Phycisphaerae;Tepidisphaerales;CPla-3_termite_group;CPla-3_termite_group;	6	7	7	16	8	3
Otu0421	80	Bacteria;Patescibacteria;WWE3;WWE3_or;WWE3_fa;WWE3;	12	8	6	14	4	12
Otu0422	252	Bacteria;Planctomycetota;Phycisphaerae;CCM11a;CCM11a_fa;CCM11a;	26	23	56	14	7	64
Otu0423	127	Bacteria;Planctomycetota;Phycisphaerae;Phycisphaerales;Phycisphaeraceae;Phycisphaeraceae_unclassified;	6	6	58	9	9	6
Otu0424	94	Bacteria;Actinobacteriota;Actinobacteria;Catenulisporales;Catenulisporaceae;Catenulispora;	5	3	3	9	10	18
Otu0425	304	Bacteria;Proteobacteria;Gammaproteobacteria;Methylococcales;Methylomonadaceae;Methylomicrobium;	7	11	165	24	16	5
Otu0426	123	Bacteria;Proteobacteria;Gammaproteobacteria;Cellvibrionales;Cellvibrionaceae;Cellvibrio;	2	6	9	30	8	2
Otu0427	187	Bacteria;Actinobacteriota;Actinobacteria;Frankiales;uncultured;uncultured;	14	20	14	5	24	36
Otu0428	204	Bacteria;Planctomycetota;Planctomycetes;Planctomycetales;Schlesneriaceae;Schlesneria;	8	18	31	25	9	20
Otu0429	67	Bacteria;Abditibacteriota;Abditibacteria;Abditibacteriales;Abditibacteriaceae;Abditibacterium;	4	9	5	12	4	2
Otu0430	190	Bacteria;Myxococcota;Polyangia;Polyangiales;Polyangiaceae;uncultured;	14	26	31	28	15	7
Otu0431	236	Bacteria;Chloroflexi;Anaerolineae;SBR1031;A4b;A4b_unclassified;	33	45	12	44	19	13
Otu0432	75	Bacteria;Bacteroidota;Bacteroidia;Flavobacteriales;Flavobacteriales_unclassified;Flavobacteriales_unclassified;	0	2	11	6	0	0
Otu0433	86	Bacteria;Patescibacteria;Saccharimonadia;Saccharimonadales;WWH38;WWH38;	9	11	7	12	11	9
Otu0434	82	Bacteria;Proteobacteria;Gammaproteobacteria;Gammaproteobacteria_Incertae_Sedis;Unknown_Family;Candidatus_Berkiella;	8	17	10	12	5	11
Otu0435	228	Bacteria;Verrucomicrobiota;Verrucomicrobiae;Chthoniobacterales;Xiphinematobacteraceae;Candidatus_Xiphinematobacter;	20	32	19	44	21	11
Otu0436	132	Bacteria;Acidobacteriota;Acidobacteriae;Acidobacteriales;Acidobacteriaceae_(Subgroup_1);uncultured;	18	13	3	9	36	14
Otu0437	122	Bacteria;Proteobacteria;Gammaproteobacteria;Burkholderiales;Nitrosomonadaceae;Nitrosomonas;	7	12	30	17	14	1
Otu0438	84	Bacteria;Verrucomicrobiota;Verrucomicrobiae;Chthoniobacterales;Chthoniobacteraceae;LD29;	6	19	13	18	5	3
Otu0439	90	Bacteria;Acidobacteriota;Vicinamibacteria;Vicinamibacterales;Vicinamibacteraceae;Vicinamibacteraceae_unclassified;	5	8	11	7	17	4
Otu0440	109	Bacteria;Proteobacteria;Gammaproteobacteria;Xanthomonadales;Rhodanobacteraceae;Rhodanobacter;	13	5	7	5	21	10
Otu0441	111	Bacteria;Proteobacteria;Alphaproteobacteria;Tistrellales;Geminicoccaceae;uncultured;	10	15	6	11	7	34
Otu0442	240	Bacteria;Chloroflexi;Chloroflexia;Chloroflexales;Herpetosiphonaceae;Herpetosiphon;	32	26	12	29	3	30
Otu0443	78	Bacteria;Gemmatimonadota;Gemmatimonadetes;Gemmatimonadales;Gemmatimonadaceae;Roseisolibacter;	8	11	3	6	14	16
Otu0444	73	Bacteria;Bacteroidota;Bacteroidia;Bacteroidales;Prevotellaceae;Prevotella;	14	3	1	2	3	1
Otu0445	50	Bacteria;Actinobacteriota;Acidimicrobiia;Microtrichales;Microtrichales_fa;Microtrichales;	2	7	7	8	3	1
Otu0446	151	Bacteria;Verrucomicrobiota;Verrucomicrobiae;Verrucomicrobiales;Verrucomicrobiaceae;Roseimicrobium;	13	22	26	20	6	4
Otu0447	192	Bacteria;Planctomycetota;Phycisphaerae;mle1-8;mle1-8_fa;mle1-8;	8	18	64	22	11	7
Otu0448	131	Bacteria;Bacteroidota;Bacteroidia;Sphingobacteriales;NS11-12_marine_group;NS11-12_marine_group;	8	5	38	11	1	2
Otu0449	119	Bacteria;Patescibacteria;Microgenomatia;Candidatus_Chisholmbacteria;Candidatus_Chisholmbacteria_fa;Candidatus_Chisholmbacteria;	10	7	59	8	7	2
Otu0450	114	Bacteria;Actinobacteriota;Actinobacteria;Pseudonocardiales;Pseudonocardiaceae;Pseudonocardia;	6	16	19	1	27	9
Otu0451	87	Bacteria;Proteobacteria;Alphaproteobacteria;Rhizobiales;uncultured;uncultured;	13	21	3	2	5	10
Otu0452	68	Bacteria;Myxococcota;Myxococcia;Myxococcales;Myxococcaceae;KD3-10;	10	10	7	6	7	0
Otu0453	68	Bacteria;Planctomycetota;Phycisphaerae;Phycisphaerales;AKAU3564_sediment_group;AKAU3564_sediment_group;	3	8	37	3	5	3
Otu0454	69	Bacteria;Planctomycetota;Planctomycetes;Isosphaerales;Isosphaeraceae;Tundrisphaera;	8	13	10	6	4	5
Otu0455	171	Bacteria;Myxococcota;Polyangia;Polyangiales;Polyangiaceae;Sorangium;	52	35	13	21	19	6
Otu0456	262	Bacteria;Actinobacteriota;Actinobacteria;Micrococcales;Micrococcaceae;Paenarthrobacter;	23	40	15	17	28	19
Otu0457	100	Archaea;Halobacterota;Methanomicrobia;Methanomicrobiales;Methanomicrobiaceae;Methanoculleus;	9	10	22	11	1	1
Otu0458	56	Bacteria;Planctomycetota;BD7-11;BD7-11_or;BD7-11_fa;BD7-11;	4	1	5	10	6	9
Otu0459	72	Bacteria;Myxococcota;Myxococcia;Myxococcales;Myxococcaceae;P3OB-42;	9	11	14	8	7	3
Otu0460	569	Bacteria;Firmicutes;Clostridia;Peptostreptococcales-Tissierellales;Peptostreptococcaceae;Paeniclostridium;	68	77	58	54	53	64
Otu0461	101	Bacteria;Bacteroidota;SJA-28;SJA-28_or;SJA-28_fa;SJA-28;	15	12	19	16	10	4
Otu0462	70	Bacteria;Patescibacteria;Parcubacteria;Parcubacteria_or;Parcubacteria_fa;Parcubacteria;	11	7	8	11	9	2
Otu0463	91	Bacteria;Actinobacteriota;Actinobacteria;Streptosporangiales;Streptosporangiales_unclassified;Streptosporangiales_unclassified;	3	10	13	8	2	2
Otu0464	46	Bacteria;Actinobacteriota;Thermoleophilia;Gaiellales;Gaiellales_fa;Gaiellales;	1	2	5	5	1	0
Otu0465	98	Bacteria;Chloroflexi;Ktedonobacteria;Ktedonobacterales;Ktedonobacterales_unclassified;Ktedonobacterales_unclassified;	6	3	5	9	5	18
Otu0466	121	Bacteria;Chloroflexi;Anaerolineae;Ardenticatenales;Ardenticatenaceae;uncultured;	26	13	11	29	0	9
Otu0467	110	Bacteria;Chloroflexi;Ktedonobacteria;Ktedonobacterales;Ktedonobacteraceae;G12-WMSP1;	19	5	4	15	5	14
Otu0468	78	Bacteria;Cyanobacteria;Cyanobacteriia;Cyanobacteriales;Nostocaceae;Nostocaceae_unclassified;	11	8	3	11	2	7
Otu0469	130	Bacteria;Verrucomicrobiota;Verrucomicrobiae;Pedosphaerales;Pedosphaeraceae;uncultured;	12	23	20	12	6	4
Otu0470	105	Bacteria;Verrucomicrobiota;Verrucomicrobiae;Verrucomicrobiales;Verrucomicrobiaceae;Prosthecobacter;	7	10	11	9	46	1
Otu0471	251	Bacteria;Planctomycetota;Phycisphaerae;Phycisphaerales;Phycisphaeraceae;CL500-3;	11	32	45	74	8	21
Otu0472	80	Bacteria;Bacteroidota;Rhodothermia;Rhodothermales;Rhodothermaceae;Rhodothermaceae_unclassified;	11	7	3	16	6	4
Otu0473	242	Bacteria;Proteobacteria;Alphaproteobacteria;Tistrellales;Geminicoccaceae;Geminicoccus;	20	84	22	20	13	47
Otu0474	91	Bacteria;Bacteroidota;Bacteroidia;Bacteroidales;Prolixibacteraceae;Prolixibacteraceae_unclassified;	9	8	23	22	6	2
Otu0475	175	Bacteria;Firmicutes;Clostridia;Clostridiales;Caloramatoraceae;Fonticella;	17	20	20	19	16	28
Otu0476	68	Bacteria;Chloroflexi;Chloroflexia;Chloroflexales;Roseiflexaceae;Roseiflexaceae_unclassified;	12	10	4	6	5	5
Otu0477	68	Bacteria;Chloroflexi;Dehalococcoidia;Dehalococcoidales;uncultured;uncultured;	7	3	18	7	6	0
Otu0478	123	Bacteria;Cyanobacteria;Cyanobacteriia;Cyanobacteriales;Cyanobacteriales_unclassified;Cyanobacteriales_unclassified;	24	2	2	48	8	2
Otu0479	292	Bacteria;Cyanobacteria;Cyanobacteriia;Cyanobacteriales;Coleofasciculaceae;Coleofasciculaceae_unclassified;	98	12	11	54	9	24
Otu0480	201	Bacteria;Chloroflexi;Anaerolineae;Caldilineales;Caldilineaceae;Litorilinea;	21	40	26	32	13	22
Otu0481	620	Bacteria;Actinobacteriota;Actinobacteria;Micrococcales;Micrococcaceae;Pseudarthrobacter;	86	176	23	31	67	96
Otu0482	105	Bacteria;Proteobacteria;Gammaproteobacteria;EPR3968-O8a-Bc78;EPR3968-O8a-Bc78_fa;EPR3968-O8a-Bc78;	14	13	19	11	11	7
Otu0483	97	Bacteria;Planctomycetota;Planctomycetes;Planctomycetales;Gimesiaceae;uncultured;	7	15	24	10	9	11
Otu0484	161	Bacteria;Chloroflexi;Chloroflexia;Thermomicrobiales;Thermomicrobiales_unclassified;Thermomicrobiales_unclassified;	20	27	9	11	14	53
Otu0485	51	Bacteria;Chloroflexi;Chloroflexia;Chloroflexales;Chloroflexaceae;Chloroflexaceae_unclassified;	7	6	12	4	1	3
Otu0486	165	Bacteria;Actinobacteriota;MB-A2-108;MB-A2-108_or;MB-A2-108_fa;MB-A2-108;	20	33	12	11	15	48
Otu0487	85	Bacteria;Spirochaetota;Spirochaetia;Spirochaetales;Spirochaetaceae;Spirochaeta;	21	13	16	9	2	2
Otu0488	67	Bacteria;Planctomycetota;Planctomycetes;Isosphaerales;Isosphaeraceae;Paludisphaera;	0	10	17	14	1	2
Otu0489	58	Bacteria;Verrucomicrobiota;Verrucomicrobiae;Pedosphaerales;Pedosphaeraceae;Pedosphaera;	6	7	5	5	18	2
Otu0490	99	Bacteria;Proteobacteria;Gammaproteobacteria;Burkholderiales;Oxalobacteraceae;Pseudoduganella;	34	9	0	5	2	6
Otu0491	112	Bacteria;Spirochaetota;Spirochaetia;Spirochaetales;Spirochaetaceae;Spirochaetaceae_unclassified;	17	15	21	8	13	6
Otu0492	79	Bacteria;Proteobacteria;Alphaproteobacteria;Kiloniellales;Fodinicurvataceae;uncultured;	5	20	5	9	2	10
Otu0493	193	Bacteria;Proteobacteria;Alphaproteobacteria;Rhizobiales;Methyloligellaceae;Methyloceanibacter;	49	42	13	8	13	34
Otu0494	73	Bacteria;Actinobacteriota;Acidimicrobiia;Microtrichales;Ilumatobacteraceae;CL500-29_marine_group;	6	9	16	11	5	4
Otu0495	162	Bacteria;Proteobacteria;Alphaproteobacteria;Rhodobacterales;Rhodobacteraceae;Amaricoccus;	9	32	30	22	14	22
Otu0496	252	Bacteria;Myxococcota;Polyangia;Nannocystales;Nannocystaceae;Nannocystaceae;	46	36	32	41	7	18
Otu0497	87	Bacteria;Actinobacteriota;Actinobacteria;Micromonosporales;Micromonosporaceae;Actinoplanes;	11	9	8	11	14	15
Otu0498	97	Bacteria;Bacteroidota;Bacteroidia;Bacteroidales;Prolixibacteraceae;uncultured;	0	1	34	18	3	0
Otu0499	68	Bacteria;Actinobacteriota;Actinobacteria;Corynebacteriales;Nocardiaceae;Nocardia;	6	14	2	6	7	9
Otu0500	104	Bacteria;Planctomycetota;Phycisphaerae;S-70;S-70_fa;S-70;	15	7	19	11	8	8
Otu0501	64	Bacteria;Actinobacteriota;Actinobacteria;Corynebacteriales;Nocardiaceae;Nocardiaceae_unclassified;	2	17	6	4	2	8
Otu0502	40	Bacteria;Proteobacteria;Alphaproteobacteria;Rhizobiales;Devosiaceae;Devosiaceae;	1	3	3	14	0	0
Otu0503	139	Bacteria;Proteobacteria;Alphaproteobacteria;Ferrovibrionales;Ferrovibrionaceae;Ferrovibrio;	15	16	15	27	6	17
Otu0504	48	Bacteria;Firmicutes;Clostridia;Oscillospirales;UCG-010;UCG-010;	1	9	9	3	4	5
Otu0505	64	Bacteria;Bdellovibrionota;Oligoflexia;Oligoflexales;Oligoflexales_fa;Oligoflexus;	12	7	7	12	4	1
Otu0506	179	Bacteria;Proteobacteria;Gammaproteobacteria;Burkholderiales;Nitrosomonadaceae;IS-44;	9	29	29	26	15	35
Otu0507	74	Bacteria;Proteobacteria;Gammaproteobacteria;211ds20;211ds20_fa;211ds20;	11	11	7	9	6	4
Otu0508	44	Bacteria;Firmicutes;Clostridia;Christensenellales;Christensenellaceae;Christensenellaceae_unclassified;	0	6	11	4	8	1
Otu0509	219	Bacteria;Proteobacteria;Gammaproteobacteria;Alteromonadales;Alteromonadaceae;Rheinheimera;	3	1	8	2	17	1
Otu0510	143	Bacteria;Bacteroidota;Bacteroidia;Bacteroidales;Dysgonomonadaceae;Fermentimonas;	11	6	29	23	14	0
Otu0511	93	Bacteria;Proteobacteria;Alphaproteobacteria;Rhizobiales;Beijerinckiaceae;Roseiarcus;	11	9	6	17	12	8
Otu0512	38	Bacteria;Proteobacteria;Alphaproteobacteria;Rhizobiales;Xanthobacteraceae;Nitrobacter;	2	2	3	6	2	2
Otu0513	133	Bacteria;Bacteroidota;Bacteroidia;Chitinophagales;Chitinophagaceae;Flavihumibacter;	13	25	20	21	7	1
Otu0514	73	Bacteria;Verrucomicrobiota;Chlamydiae;Chlamydiales;Simkaniaceae;Simkaniaceae_unclassified;	7	1	8	8	5	0
Otu0515	109	Bacteria;Bacteroidota;Bacteroidia;Sphingobacteriales;AKYH767;AKYH767;	8	8	17	17	12	3
Otu0516	87	Bacteria;Firmicutes;Clostridia;Oscillospirales;Ruminococcaceae;uncultured;	3	0	33	2	8	5
Otu0517	113	Bacteria;Chloroflexi;Chloroflexia;Thermomicrobiales;Thermomicrobiaceae;Sphaerobacter;	20	12	8	6	5	3
Otu0518	210	Bacteria;Proteobacteria;Alphaproteobacteria;Rhizobiales;Rhizobiaceae;Shinella;	9	52	28	19	7	4
Otu0519	55	Bacteria;Proteobacteria;Alphaproteobacteria;Micavibrionales;Micavibrionales_unclassified;Micavibrionales_unclassified;	4	8	5	12	1	7
Otu0520	58	Bacteria;Acidobacteriota;Blastocatellia;Blastocatellales;Blastocatellaceae;Tellurimicrobium;	3	8	5	6	1	6
Otu0521	296	Bacteria;Firmicutes;Clostridia;Clostridia_or;Hungateiclostridiaceae;uncultured;	0	2	205	12	13	2
Otu0522	107	Bacteria;Proteobacteria;Gammaproteobacteria;Cellvibrionales;Spongiibacteraceae;BD1-7_clade;	4	5	30	11	27	6
Otu0523	56	Bacteria;Planctomycetota;Planctomycetes;Pirellulales;Pirellulaceae;Pir2_lineage;	2	4	14	26	0	0
Otu0524	219	Bacteria;Firmicutes;Clostridia;Clostridia_or;Hungateiclostridiaceae;Acetivibrio;	38	25	21	13	23	10
Otu0525	66	Bacteria;Verrucomicrobiota;Verrucomicrobiae;Verrucomicrobiales;Verrucomicrobiaceae;uncultured;	12	4	6	13	3	5
Otu0526	51	Bacteria;Proteobacteria;Alphaproteobacteria;Rhizobiales;KF-JG30-B3;KF-JG30-B3;	5	9	3	8	3	7
Otu0527	165	Bacteria;Proteobacteria;Gammaproteobacteria;Methylococcales;Methylomonadaceae;Methylosarcina;	22	31	25	12	21	4
Otu0528	65	Bacteria;WS2;WS2_cl;WS2_or;WS2_fa;WS2;	4	6	21	12	0	5
Otu0529	125	Bacteria;Proteobacteria;Alphaproteobacteria;Rhizobiales;Rhodomicrobiaceae;Rhodomicrobium;	12	32	4	6	14	8
Otu0530	41	Bacteria;Elusimicrobiota;Lineage_IIb;Lineage_IIb_or;Lineage_IIb_fa;Lineage_IIb;	6	8	4	9	2	1
Otu0531	156	Bacteria;Proteobacteria;Alphaproteobacteria;Rhizobiales;Beijerinckiaceae;Bosea;	14	33	26	19	7	6
Otu0532	233	Bacteria;Proteobacteria;Alphaproteobacteria;Caulobacterales;Caulobacteraceae;Caulobacter;	11	23	17	20	82	8
Otu0533	377	Bacteria;Actinobacteriota;Actinobacteria;Micrococcales;Intrasporangiaceae;Phycicoccus;	58	77	15	26	31	91
Otu0534	113	Bacteria;Bacteroidota;Bacteroidia;Chitinophagales;Chitinophagaceae;Ferruginibacter;	7	6	16	23	2	0
Otu0535	190	Bacteria;Proteobacteria;Alphaproteobacteria;Rhizobiales;Rhizobiales_Incertae_Sedis;Nordella;	17	22	19	24	24	31
Otu0536	40	Bacteria;Firmicutes;Syntrophomonadia;Syntrophomonadales;Syntrophomonadaceae;Syntrophomonadaceae_unclassified;	3	7	5	2	2	3
Otu0537	140	Bacteria;Fibrobacterota;Fibrobacteria;Fibrobacterales;Fibrobacteraceae;possiblenus_04;	14	4	22	32	19	2
Otu0538	35	Bacteria;Acidobacteriota;Vicinamibacteria;Vicinamibacterales;Vicinamibacterales_fa;Vicinamibacterales;	0	0	2	2	0	2
Otu0539	36	Bacteria;Myxococcota;Myxococcia;Myxococcales;Myxococcales_unclassified;Myxococcales_unclassified;	2	11	5	1	2	2
Otu0540	118	Bacteria;Actinobacteriota;Actinobacteria;Micrococcales;Cellulomonadaceae;Cellulomonas;	7	22	25	15	5	14
Otu0541	41	Bacteria;Firmicutes;Clostridia;Oscillospirales;Oscillospirales_unclassified;Oscillospirales_unclassified;	1	2	9	5	6	3
Otu0542	123	Bacteria;Actinobacteriota;Actinobacteria;Corynebacteriales;Nocardiaceae;Rhodococcus;	17	30	18	9	9	13
Otu0543	35	Bacteria;Bacteroidota;Bacteroidia;Flavobacteriales;Weeksellaceae;Weeksellaceae;	0	0	0	7	0	0
Otu0544	103	Bacteria;Fibrobacterota;Fibrobacteria;Fibrobacterales;Fibrobacteraceae;uncultured;	4	9	18	30	7	1
Otu0545	50	Bacteria;Chloroflexi;Chloroflexia;Kallotenuales;AKIW781;AKIW781;	4	5	3	3	4	9
Otu0546	38	Bacteria;Planctomycetota;Phycisphaerae;MSBL9;MSBL9_unclassified;MSBL9_unclassified;	2	0	6	10	4	1
Otu0547	36	Bacteria;Firmicutes;Limnochordia;Limnochordales;Limnochordaceae;Limnochordaceae;	4	8	3	4	2	4
Otu0548	49	Bacteria;RCP2-54;RCP2-54_cl;RCP2-54_or;RCP2-54_fa;RCP2-54;	12	4	6	5	6	4
Otu0549	95	Bacteria;Acidobacteriota;Acidobacteriae;PAUC26f;PAUC26f_fa;PAUC26f;	7	14	24	14	4	9
Otu0550	410	Bacteria;Firmicutes;Bacilli;Bacillales;Bacillaceae;Fictibacillus;	84	50	16	3	19	3
Otu0551	83	Bacteria;Proteobacteria;Alphaproteobacteria;Rhizobiales;D05-2;D05-2;	11	20	12	12	2	6
Otu0552	44	Bacteria;Patescibacteria;Saccharimonadia;Saccharimonadales;Saccharimonadaceae;Candidatus_Saccharimonas;	2	4	15	3	7	0
Otu0553	73	Bacteria;Proteobacteria;Alphaproteobacteria;Rhizobiales;Hyphomicrobiaceae;uncultured;	14	6	5	12	5	8
Otu0554	69	Bacteria;Proteobacteria;Alphaproteobacteria;Acetobacterales;Acetobacteraceae;uncultured;	5	16	9	7	6	12
Otu0555	355	Bacteria;Proteobacteria;Alphaproteobacteria;Sneathiellales;Sneathiellaceae;Sneathiella;	12	20	228	33	33	11
Otu0556	79	Bacteria;Proteobacteria;Gammaproteobacteria;Burkholderiales;Oxalobacteraceae;Noviherbaspirillum;	17	17	5	4	15	7
Otu0557	37	Bacteria;Acidobacteriota;Acidobacteriota_unclassified;Acidobacteriota_unclassified;Acidobacteriota_unclassified;Acidobacteriota_unclassified;	1	6	1	4	1	0
Otu0558	61	Bacteria;Patescibacteria;Microgenomatia;Microgenomatia_or;Microgenomatia_fa;Microgenomatia;	10	11	15	5	4	2
Otu0559	60	Bacteria;Proteobacteria;Alphaproteobacteria;Rhizobiales;Xanthobacteraceae;Xanthobacteraceae;	4	6	9	7	1	9
Otu0560	33	Bacteria;Bacteroidota;Bacteroidia;Flavobacteriales;Weeksellaceae;Weeksellaceae_unclassified;	0	1	4	3	2	0
Otu0561	46	Bacteria;Actinobacteriota;Actinobacteria;Kineosporiales;Kineosporiaceae;Quadrisphaera;	1	3	6	5	3	15
Otu0562	52	Bacteria;Verrucomicrobiota;Verrucomicrobiae;Chthoniobacterales;Chthoniobacterales_unclassified;Chthoniobacterales_unclassified;	4	3	12	7	5	4
Otu0563	174	Bacteria;Acidobacteriota;Blastocatellia;Blastocatellales;Blastocatellaceae;JGI_0001001-H03;	17	16	28	12	14	24
Otu0564	123	Bacteria;Actinobacteriota;Actinobacteria;Micromonosporales;Micromonosporaceae;Luedemannella;	27	15	11	10	15	16
Otu0565	170	Bacteria;Actinobacteriota;Actinobacteria;Frankiales;Geodermatophilaceae;Blastococcus;	31	23	12	14	22	25
Otu0566	94	Bacteria;Bacteroidota;Bacteroidia;Chitinophagales;Chitinophagaceae;Flavitalea;	14	13	13	8	4	0
Otu0567	33	Bacteria;Acidobacteriota;Acidobacteriae;Acidobacteriales;Acidobacteriaceae_(Subgroup_1);Terracidiphilus;	1	3	3	3	3	3
Otu0568	63	Bacteria;Spirochaetota;Leptospirae;Leptospirales;Leptospiraceae;RBG-16-49-21;	0	0	21	9	7	0
Otu0569	107	Bacteria;Proteobacteria;Gammaproteobacteria;Burkholderiales;Rhodocyclaceae;Thauera;	4	24	20	10	6	1
Otu0570	309	Bacteria;Proteobacteria;Gammaproteobacteria;Burkholderiales;Rhodocyclaceae;Zoogloea;	5	32	16	19	206	15
Otu0571	95	Bacteria;Bacteroidota;Ignavibacteria;Ignavibacteriales;PHOS-HE36;PHOS-HE36;	23	5	17	19	9	2
Otu0572	87	Bacteria;Verrucomicrobiota;Verrucomicrobiae;Pedosphaerales;Pedosphaeraceae;Ellin516;	11	12	8	14	10	3
Otu0573	33	Bacteria;Acidobacteriota;Acidobacteriae;Acidobacteriales;Acidobacteriales_fa;Acidobacteriales;	2	1	0	4	2	1
Otu0574	42	Bacteria;Patescibacteria;Parcubacteria;Candidatus_Nomurabacteria;Candidatus_Nomurabacteria_fa;Candidatus_Nomurabacteria;	5	1	17	11	0	1
Otu0575	38	Bacteria;Firmicutes;Clostridia;Oscillospirales;Ruminococcaceae;Ruminococcaceae_unclassified;	3	4	12	4	3	0
Otu0576	59	Bacteria;Verrucomicrobiota;Chlamydiae;Chlamydiales;Criblamydiaceae;Estrella;	10	8	4	17	3	0
Otu0577	197	Bacteria;Firmicutes;Clostridia;Peptostreptococcales-Tissierellales;Peptostreptococcaceae;Terrisporobacter;	21	31	20	11	40	12
Otu0578	34	Bacteria;Firmicutes;Bacilli;Paenibacillales;Paenibacillaceae;Cohnella;	3	2	4	2	6	3
Otu0579	39	Bacteria;Verrucomicrobiota;Chlamydiae;Chlamydiales;Parachlamydiaceae;uncultured;	4	12	1	8	0	0
Otu0580	270	Bacteria;Bacteroidota;Rhodothermia;Rhodothermia_unclassified;Rhodothermia_unclassified;Rhodothermia_unclassified;	22	23	41	8	3	38
Otu0581	37	Bacteria;Firmicutes;Bacilli;Izemoplasmatales;Izemoplasmatales_fa;Izemoplasmatales;	6	8	2	1	4	0
Otu0582	46	Bacteria;Proteobacteria;Alphaproteobacteria;Micropepsales;Micropepsaceae;Micropepsaceae_unclassified;	3	3	6	5	8	2
Otu0583	45	Bacteria;Sva0485;Sva0485_cl;Sva0485_or;Sva0485_fa;Sva0485;	2	4	12	10	7	0
Otu0584	55	Bacteria;Proteobacteria;Alphaproteobacteria;Rhizobiales;A0839;A0839;	4	10	13	3	5	6
Otu0585	38	Bacteria;Chloroflexi;Dehalococcoidia;Dehalococcoidia_unclassified;Dehalococcoidia_unclassified;Dehalococcoidia_unclassified;	2	0	7	6	5	1
Otu0586	73	Bacteria;Myxococcota;Myxococcia;Myxococcales;Myxococcaceae;Archangium;	7	6	18	6	18	10
Otu0587	50	Bacteria;Actinobacteriota;Actinobacteria;Streptosporangiales;Thermomonosporaceae;Actinoallomurus;	9	2	4	7	13	6
Otu0588	49	Bacteria;Patescibacteria;ABY1;Candidatus_Falkowbacteria;Candidatus_Falkowbacteria_fa;Candidatus_Falkowbacteria;	1	2	8	25	2	0
Otu0589	131	Bacteria;Bacteroidota;Bacteroidia;Chitinophagales;Chitinophagaceae;Parafilimonas;	15	6	16	9	14	2
Otu0590	56	Bacteria;Proteobacteria;Alphaproteobacteria;Rhizobiales;Rhizobiales_Incertae_Sedis;uncultured;	1	5	14	3	9	6
Otu0591	57	Bacteria;Bacteroidota;Bacteroidia;Cytophagales;Hymenobacteraceae;Hymenobacter;	6	31	2	1	5	2
Otu0592	44	Bacteria;Acidobacteriota;Blastocatellia;DS-100;DS-100_fa;DS-100;	1	11	6	2	6	10
Otu0593	87	Bacteria;Bacteroidota;Bacteroidia;Cytophagales;Spirosomaceae;Persicitalea;	2	8	5	11	47	2
Otu0594	30	Bacteria;Bacteroidota;Bacteroidia;Sphingobacteriales;Sphingobacteriaceae;Sphingobacteriaceae;	0	2	1	8	0	1
Otu0595	48	Bacteria;Acidobacteriota;Blastocatellia;Blastocatellales;Blastocatellaceae;Blastocatella;	4	3	2	4	7	11
Otu0596	78	Bacteria;Chloroflexi;Chloroflexia;Chloroflexales;Chloroflexaceae;Candidatus_Chloroploca;	15	5	11	10	2	3
Otu0597	75	Bacteria;Chloroflexi;Anaerolineae;SBR1031;A4b;OLB13;	5	9	7	17	9	1
Otu0598	43	Bacteria;Verrucomicrobiota;Omnitrophia;Omnitrophales;Omnitrophaceae;Candidatus_Omnitrophus;	8	2	5	15	3	1
Otu0599	46	Bacteria;Firmicutes;Bacilli;Thermoactinomycetales;Thermoactinomycetaceae;Planifilum;	5	9	4	2	1	7
Otu0600	38	Bacteria;Planctomycetota;Planctomycetes;Pirellulales;Pirellulaceae;Roseimaritima;	3	1	2	7	0	2
Otu0601	50	Bacteria;Proteobacteria;Alphaproteobacteria;Holosporales;Holosporaceae;uncultured;	8	6	12	10	2	2
Otu0602	38	Bacteria;Myxococcota;bacteriap25;bacteriap25_or;bacteriap25_fa;bacteriap25;	4	6	6	6	7	1
Otu0603	61	Bacteria;Planctomycetota;Phycisphaerae;Tepidisphaerales;Tepidisphaeraceae;Tepidisphaera;	3	5	6	14	1	5
Otu0604	45	Bacteria;Actinobacteriota;Thermoleophilia;Solirubrobacterales;Solirubrobacteraceae;Parviterribacter;	4	5	12	4	4	1
Otu0605	49	Bacteria;Bacteroidota;Bacteroidia;Chitinophagales;37-13;37-13;	2	3	5	1	14	0
Otu0606	38	Bacteria;Actinobacteriota;Actinobacteria;Euzebyales;Euzebyaceae;uncultured;	6	8	2	3	2	3
Otu0607	31	Bacteria;Methylomirabilota;Methylomirabilia;Rokubacteriales;Rokubacteriales_fa;Rokubacteriales;	0	3	6	3	5	4
Otu0608	83	Bacteria;Firmicutes;Clostridia;Oscillospirales;Ruminococcaceae;Ruminococcus;	12	8	11	6	9	7
Otu0609	53	Bacteria;Firmicutes;Clostridia;Lachnospirales;Lachnospiraceae;Lachnospiraceae;	0	5	26	8	0	4
Otu0610	115	Bacteria;Proteobacteria;Alphaproteobacteria;Rhodobacterales;Rhodobacteraceae;Rhodobacter;	6	12	23	11	7	6
Otu0611	91	Bacteria;Proteobacteria;Alphaproteobacteria;Rhizobiales;Rhodobiaceae;Tepidamorphus;	6	10	23	2	17	5
Otu0612	51	Bacteria;Proteobacteria;Alphaproteobacteria;Acetobacterales;Acetobacteraceae;Acidiphilium;	9	5	3	12	5	9
Otu0613	43	Bacteria;Planctomycetota;Phycisphaerae;Tepidisphaerales;Tepidisphaeraceae;Tepidisphaeraceae;	3	4	4	7	2	2
Otu0614	168	Bacteria;Patescibacteria;ABY1;Candidatus_Magasanikbacteria;Candidatus_Magasanikbacteria_fa;Candidatus_Magasanikbacteria;	5	2	135	8	1	5
Otu0615	122	Bacteria;Actinobacteriota;Actinobacteria;Micromonosporales;Micromonosporaceae;Verrucosispora;	21	17	15	20	8	3
Otu0616	33	Bacteria;Proteobacteria;Gammaproteobacteria;Burkholderiales;Nitrosomonadaceae;uncultured;	4	6	4	2	0	2
Otu0617	42	Bacteria;Proteobacteria;Gammaproteobacteria;Burkholderiales;B1-7BS;B1-7BS;	7	4	8	2	7	3
Otu0618	48	Bacteria;Proteobacteria;Gammaproteobacteria;Ectothiorhodospirales;Thioalkalispiraceae;uncultured;	3	3	21	4	0	2
Otu0619	32	Bacteria;Myxococcota;Myxococcia;Myxococcales;Myxococcaceae;uncultured;	2	3	6	1	5	4
Otu0620	41	Bacteria;Patescibacteria;Parcubacteria;Candidatus_Adlerbacteria;Candidatus_Adlerbacteria_fa;Candidatus_Adlerbacteria;	4	3	16	5	1	2
Otu0621	90	Bacteria;Proteobacteria;Gammaproteobacteria;KI89A_clade;KI89A_clade_fa;KI89A_clade;	14	17	11	6	11	6
Otu0622	34	Bacteria;Verrucomicrobiota;Verrucomicrobiae;Chthoniobacterales;Chthoniobacteraceae;Chthoniobacteraceae_unclassified;	4	6	4	5	3	0
Otu0623	32	Bacteria;Planctomycetota;vadinHA49;vadinHA49_or;vadinHA49_fa;vadinHA49;	4	4	5	3	5	2
Otu0624	40	Bacteria;Myxococcota;Polyangia;Polyangiales;Polyangiaceae;Minicystis;	3	3	4	12	4	4
Otu0625	27	Bacteria;Firmicutes;Clostridia;Clostridia_UCG-014;Clostridia_UCG-014_fa;Clostridia_UCG-014;	6	2	1	2	6	1
Otu0626	89	Bacteria;Proteobacteria;Gammaproteobacteria;Methylococcales;Methylomonadaceae;Methylomonas;	3	0	32	4	6	1
Otu0627	219	Bacteria;Actinobacteriota;Actinobacteria;Micrococcales;Intrasporangiaceae;Intrasporangium;	53	22	11	13	35	22
Otu0628	60	Bacteria;Dadabacteria;Dadabacteriia;Dadabacteriales;Dadabacteriales_fa;Dadabacteriales;	4	4	13	5	9	8
Otu0629	53	Bacteria;Dependentiae;Babeliae;Babeliales;Babeliaceae;Babeliaceae;	12	12	11	3	1	0
Otu0630	25	Bacteria;Chloroflexi;Anaerolineae;Caldilineales;Caldilineaceae;Caldilineaceae_unclassified;	1	2	4	2	0	1
Otu0631	37	Bacteria;SAR324_clade(Marine_group_B);SAR324_clade(Marine_group_B)_cl;SAR324_clade(Marine_group_B)_or;SAR324_clade(Marine_group_B)_fa;SAR324_clade(Marine_group_B);	7	5	8	3	0	0
Otu0632	28	Bacteria;Firmicutes;Clostridia;Caldicoprobacterales;Caldicoprobacteraceae;Caldicoprobacter;	7	4	0	2	0	4
Otu0633	44	Bacteria;Actinobacteriota;Actinobacteria;Propionibacteriales;Propionibacteriaceae;Propionibacteriaceae_unclassified;	4	5	6	0	13	2
Otu0634	34	Bacteria;Bacteroidota;Bacteroidota_unclassified;Bacteroidota_unclassified;Bacteroidota_unclassified;Bacteroidota_unclassified;	1	2	3	8	1	0
Otu0635	176	Bacteria;Firmicutes;Bacilli;Bacillales;Planococcaceae;Paenisporosarcina;	42	111	0	0	1	1
Otu0636	67	Bacteria;Acidobacteriota;Acidobacteriae;Acidobacteriae_or;Acidobacteriae_fa;Paludibaculum;	11	2	8	6	7	5
Otu0637	120	Bacteria;Verrucomicrobiota;Chlamydiae;Chlamydiales;Simkaniaceae;uncultured;	9	7	14	14	55	0
Otu0638	27	Bacteria;Actinobacteriota;Actinobacteria;Corynebacteriales;Mycobacteriaceae;Mycobacteriaceae_unclassified;	2	2	1	2	1	5
Otu0639	48	Bacteria;Actinobacteriota;Actinobacteria;Pseudonocardiales;Pseudonocardiaceae;Amycolatopsis;	6	3	8	2	4	4
Otu0640	43	Bacteria;Actinobacteriota;Actinobacteria;Streptomycetales;Streptomycetaceae;Streptacidiphilus;	8	6	2	1	7	1
Otu0641	38	Bacteria;Proteobacteria;Gammaproteobacteria;Ga0077536;Ga0077536_fa;Ga0077536;	3	7	8	4	1	6
Otu0642	35	Bacteria;Verrucomicrobiota;Verrucomicrobiae;Verrucomicrobiales;DEV007;DEV007;	6	6	7	6	4	0
Otu0643	114	Bacteria;Planctomycetota;Planctomycetes;Planctomycetales;Schlesneriaceae;Schlesneriaceae_unclassified;	2	28	7	25	15	4
Otu0644	57	Bacteria;Firmicutes;Bacilli;Thermoactinomycetales;Thermoactinomycetaceae;Thermoactinomyces;	3	3	9	0	6	1
Otu0645	57	Bacteria;Proteobacteria;Gammaproteobacteria;Burkholderiales;Rhodocyclaceae;Azoarcus;	1	5	23	2	14	1
Otu0646	37	Bacteria;Firmicutes;uncultured;uncultured_or;uncultured_fa;uncultured;	5	4	3	4	4	3
Otu0647	97	Bacteria;Proteobacteria;Gammaproteobacteria;Cellvibrionales;Halieaceae;OM60(NOR5)_clade;	5	21	19	15	14	1
Otu0648	54	Bacteria;Firmicutes;Bacilli;Thermoactinomycetales;Thermoactinomycetaceae;Thermoactinomycetaceae_unclassified;	3	2	5	2	10	0
Otu0649	33	Bacteria;Cyanobacteria;Cyanobacteriia;Leptolyngbyales;Leptolyngbyaceae;Leptolyngbyaceae_unclassified;	6	1	1	16	0	0
Otu0650	37	Bacteria;Firmicutes;Clostridia;Peptostreptococcales-Tissierellales;Peptostreptococcales-Tissierellales_fa;Alkaliphilus;	7	7	2	0	0	8
Otu0651	37	Bacteria;Actinobacteriota;Actinobacteria;Micrococcales;Cellulomonadaceae;Cellulomonadaceae_unclassified;	1	0	3	3	6	11
Otu0652	38	Bacteria;Desulfobacterota;Syntrophia;Syntrophales;uncultured;uncultured;	2	2	3	11	7	0
Otu0653	53	Bacteria;Bacteroidota;Bacteroidia;Chitinophagales;Chitinophagaceae;Segetibacter;	11	4	3	7	2	0
Otu0654	25	Bacteria;Proteobacteria;Gammaproteobacteria;Burkholderiales;Nitrosomonadaceae;Nitrosomonadaceae_unclassified;	0	4	2	5	1	3
Otu0655	57	Bacteria;Actinobacteriota;Actinobacteria;Pseudonocardiales;Pseudonocardiaceae;Crossiella;	9	3	3	0	4	4
Otu0656	54	Bacteria;Bacteroidota;Bacteroidia;Chitinophagales;Chitinophagaceae;Niabella;	4	3	2	5	4	0
Otu0657	39	Bacteria;Desulfobacterota;Syntrophobacteria;Syntrophobacterales;Syntrophobacteraceae;Syntrophobacter;	3	4	2	5	7	0
Otu0658	28	Bacteria;Firmicutes;Clostridia;Oscillospirales;Ruminococcaceae;Caproiciproducens;	3	2	6	6	2	1
Otu0659	186	Bacteria;Proteobacteria;Alphaproteobacteria;Rhizobiales;Beijerinckiaceae;Methylocystis;	18	23	30	12	13	30
Otu0660	23	Bacteria;Proteobacteria;Gammaproteobacteria;Burkholderiales;Oxalobacteraceae;Rugamonas;	1	2	1	4	2	4
Otu0661	33	Bacteria;Chloroflexi;P2-11E;P2-11E_or;P2-11E_fa;P2-11E;	3	4	2	6	5	1
Otu0662	24	Bacteria;Proteobacteria;Alphaproteobacteria;Sphingomonadales;Sphingomonadaceae;Hephaestia;	0	0	3	2	2	0
Otu0663	35	Bacteria;Proteobacteria;Alphaproteobacteria;Rhizobiales;Devosiaceae;uncultured;	2	4	2	11	1	3
Otu0664	52	Bacteria;Firmicutes;Clostridia;Clostridia_or;Hungateiclostridiaceae;Ercella;	4	0	14	3	8	1
Otu0665	87	Bacteria;Acidobacteriota;Vicinamibacteria;Vicinamibacterales;Vicinamibacteraceae;uncultured;	2	34	9	4	0	24
Otu0666	72	Bacteria;Bacteroidota;Bacteroidia;Chitinophagales;Chitinophagaceae;Lacibacter;	7	2	0	7	40	0
Otu0667	27	Bacteria;Firmicutes;Clostridia;Clostridia_vadinBB60_group;Clostridia_vadinBB60_group_fa;Clostridia_vadinBB60_group;	5	5	3	3	1	2
Otu0668	45	Bacteria;Actinobacteriota;Actinobacteria;Streptosporangiales;Thermomonosporaceae;Actinocorallia;	9	9	0	11	2	7
Otu0669	95	Bacteria;Actinobacteriota;Actinobacteria;Micrococcales;Promicromonosporaceae;Cellulosimicrobium;	3	25	22	12	2	7
Otu0670	26	Bacteria;Bacteroidota;Bacteroidia;Cytophagales;Spirosomaceae;Spirosomaceae_unclassified;	2	2	4	2	1	0
Otu0671	24	Bacteria;Myxococcota;Myxococcota_unclassified;Myxococcota_unclassified;Myxococcota_unclassified;Myxococcota_unclassified;	0	3	2	4	2	3
Otu0672	48	Bacteria;Actinobacteriota;WCHB1-81;WCHB1-81_or;WCHB1-81_fa;WCHB1-81;	0	3	14	8	4	0
Otu0673	36	Bacteria;Proteobacteria;Gammaproteobacteria;Burkholderiales;Methylophilaceae;Methylophilaceae_unclassified;	0	1	10	4	6	0
Otu0674	38	Bacteria;Bacteroidota;Bacteroidia;Chitinophagales;Chitinophagaceae;Flaviaesturariibacter;	18	3	1	5	0	0
Otu0675	119	Bacteria;Cyanobacteria;Cyanobacteriia;Oxyphotobacteria_Incertae_Sedis;Unknown_Family;Unknown_Family_unclassified;	35	4	3	32	2	15
Otu0676	52	Archaea;Halobacterota;Methanocellia;Methanocellales;Methanocellaceae;Rice_Cluster_I;	1	3	2	13	5	1
Otu0677	53	Bacteria;Proteobacteria;Alphaproteobacteria;Rhizobiales;Hyphomicrobiaceae;Filomicrobium;	1	7	11	2	4	5
Otu0678	41	Bacteria;Actinobacteriota;Actinobacteria;Glycomycetales;Glycomycetaceae;Glycomyces;	2	2	5	3	7	1
Otu0679	23	Bacteria;Actinobacteriota;Actinobacteria;Micrococcales;Intrasporangiaceae;Oryzihumus;	0	1	2	5	0	0
Otu0680	57	Bacteria;Synergistota;Synergistia;Synergistales;Synergistaceae;uncultured;	0	2	19	3	4	0
Otu0681	110	Bacteria;Proteobacteria;Gammaproteobacteria;Steroidobacterales;Woeseiaceae;Woeseia;	19	14	10	6	37	5
Otu0682	34	Bacteria;Armatimonadota;Armatimonadota_unclassified;Armatimonadota_unclassified;Armatimonadota_unclassified;Armatimonadota_unclassified;	10	3	5	2	0	0
Otu0683	36	Archaea;Thermoplasmatota;Thermoplasmata;Methanomassiliicoccales;Methanomassiliicoccaceae;Methanomassiliicoccus;	7	4	3	4	1	0
Otu0684	58	Bacteria;Actinobacteriota;Actinobacteria;PeM15;PeM15_fa;PeM15;	2	8	21	7	3	5
Otu0685	88	Bacteria;Bacteroidota;Bacteroidia;Bacteroidales;Rikenellaceae;DMER64;	0	0	39	5	0	0
Otu0686	55	Bacteria;Proteobacteria;Gammaproteobacteria;Cellvibrionales;Cellvibrionaceae;uncultured;	2	10	8	7	1	1
Otu0687	47	Bacteria;Proteobacteria;Alphaproteobacteria;Rhodobacterales;Rhodobacteraceae;Paracoccus;	1	11	7	4	6	7
Otu0688	27	Bacteria;Patescibacteria;Parcubacteria;Candidatus_Campbellbacteria;Candidatus_Campbellbacteria_fa;Candidatus_Campbellbacteria;	0	2	5	5	6	1
Otu0689	79	Bacteria;Spirochaetota;Spirochaetia;Spirochaetales;Spirochaetaceae;uncultured;	0	1	23	7	10	0
Otu0690	40	Bacteria;Bacteroidota;Rhodothermia;Rhodothermales;Rhodothermaceae;uncultured;	5	8	11	6	4	1
Otu0691	27	Bacteria;Actinobacteriota;Actinobacteria;Corynebacteriales;Dietziaceae;Dietzia;	2	7	2	4	0	3
Otu0692	170	Bacteria;Actinobacteriota;Actinobacteria;Micromonosporales;Micromonosporaceae;Micromonospora;	45	26	23	13	3	8
Otu0693	47	Bacteria;Proteobacteria;Alphaproteobacteria;Azospirillales;Inquilinaceae;Inquilinus;	6	5	6	7	7	6
Otu0694	65	Bacteria;Patescibacteria;uncultured;uncultured_or;uncultured_fa;uncultured;	20	4	1	3	2	4
Otu0695	45	Bacteria;Proteobacteria;Alphaproteobacteria;Elsterales;Elsteraceae;uncultured;	3	4	1	4	13	6
Otu0696	47	Bacteria;Zixibacteria;Zixibacteria_cl;Zixibacteria_or;Zixibacteria_fa;Zixibacteria;	6	3	8	4	6	3
Otu0697	33	Bacteria;Chloroflexi;Anaerolineae;Anaerolineales;Anaerolineaceae;Pelolinea;	4	0	6	5	3	0
Otu0698	21	Bacteria;Patescibacteria;Saccharimonadia;Saccharimonadales;Saccharimonadaceae;Saccharimonadaceae_unclassified;	0	1	2	4	0	2
Otu0699	37	Bacteria;Actinobacteriota;Actinobacteria;Propionibacteriales;Nocardioidaceae;Actinopolymorpha;	1	4	4	0	5	6
Otu0700	70	Bacteria;Bacteroidota;Bacteroidia;Cytophagales;Cyclobacteriaceae;Imperialibacter;	14	16	16	0	0	10
Otu0701	31	Bacteria;Firmicutes;Clostridia;Clostridia_or;Gracilibacteraceae;Lutispora;	2	3	6	4	1	1
Otu0702	24	Bacteria;Proteobacteria;Alphaproteobacteria;Rickettsiales;Rickettsiales_unclassified;Rickettsiales_unclassified;	3	1	4	2	3	2
Otu0703	20	Bacteria;Desulfobacterota;Desulfobacterota_unclassified;Desulfobacterota_unclassified;Desulfobacterota_unclassified;Desulfobacterota_unclassified;	2	2	3	6	1	0
Otu0704	28	Bacteria;Firmicutes;Clostridia;Peptostreptococcales-Tissierellales;Anaerovoracaceae;Anaerovorax;	2	2	6	1	8	0
Otu0705	27	Bacteria;Proteobacteria;Gammaproteobacteria;Gammaproteobacteria_Incertae_Sedis;Unknown_Family;Candidatus_Ovatusbacter;	2	6	0	5	3	2
Otu0706	20	Bacteria;Bacteroidota;Bacteroidia;Chitinophagales;Chitinophagales_unclassified;Chitinophagales_unclassified;	3	1	4	2	1	0
Otu0707	23	Bacteria;Firmicutes;Clostridia;Clostridia_or;Gracilibacteraceae;Gracilibacteraceae_unclassified;	1	4	3	1	0	3
Otu0708	63	Bacteria;Proteobacteria;Gammaproteobacteria;Burkholderiales;Comamonadaceae;Curvibacter;	1	4	13	5	22	0
Otu0709	31	Bacteria;Proteobacteria;Alphaproteobacteria;Rhizobiales;Devosiaceae;Arsenicitalea;	2	6	2	4	0	5
Otu0710	58	Bacteria;Firmicutes;Bacilli;Brevibacillales;Brevibacillaceae;Brevibacillus;	1	7	3	3	5	1
Otu0711	32	Bacteria;Bacteroidota;Bacteroidia;Sphingobacteriales;Sphingobacteriaceae;Arcticibacter;	5	3	0	10	0	1
Otu0712	79	Bacteria;Proteobacteria;Alphaproteobacteria;Rhizobiales;Pleomorphomonadaceae;Chthonobacter;	4	11	16	16	3	13
Otu0713	27	Bacteria;GAL15;GAL15_cl;GAL15_or;GAL15_fa;GAL15;	0	2	3	2	1	7
Otu0714	20	Bacteria;Actinobacteriota;Acidimicrobiia;Microtrichales;Ilumatobacteraceae;Ilumatobacteraceae;	1	3	2	5	0	0
Otu0715	22	Bacteria;Dependentiae;Babeliae;Babeliales;UBA12409;UBA12409;	2	1	9	5	1	0
Otu0716	35	Bacteria;Actinobacteriota;Actinobacteria;Corynebacteriales;Nocardiaceae;Smaragdicoccus;	4	3	1	4	0	4
Otu0717	22	Bacteria;Cyanobacteria;Vampirivibrionia;Vampirovibrionales;Vampirovibrionales_fa;Vampirovibrionales;	3	2	4	1	5	3
Otu0718	24	Bacteria;Chloroflexi;Chloroflexia;Thermomicrobiales;Thermomicrobiaceae;Thermomicrobiaceae_unclassified;	0	7	5	1	4	1
Otu0719	113	Bacteria;Verrucomicrobiota;Chlamydiae;Chlamydiales;Waddliaceae;Waddlia;	6	32	11	22	8	0
Otu0720	23	Bacteria;Desulfobacterota;Desulfobacteria;Desulfatiglandales;Desulfatiglandaceae;Desulfatiglans;	2	2	0	9	2	0
Otu0721	32	Bacteria;Verrucomicrobiota;Verrucomicrobiae;Opitutales;Opitutaceae;Cephaloticoccus;	0	0	6	2	2	0
Otu0722	31	Bacteria;Acidobacteriota;Acidobacteriae;Acidobacteriales;Acidobacteriaceae_(Subgroup_1);Edaphobacter;	5	3	1	8	2	2
Otu0723	21	Bacteria;Actinobacteriota;Coriobacteriia;Coriobacteriales;Eggerthellaceae;DNF00809;	1	3	7	3	0	5
Otu0724	19	Bacteria;Proteobacteria;Alphaproteobacteria;Caulobacterales;Caulobacteraceae;Caulobacteraceae;	0	2	0	5	0	0
Otu0725	103	Bacteria;Proteobacteria;Gammaproteobacteria;Cellvibrionales;Halieaceae;Halieaceae_unclassified;	3	1	3	2	85	1
Otu0726	43	Bacteria;Firmicutes;Clostridia;Clostridiales;Clostridiaceae;Clostridium_sensu_stricto_12;	8	3	4	4	14	3
Otu0727	727	Bacteria;Actinobacteriota;Actinobacteria;Micrococcales;Intrasporangiaceae;Janibacter;	104	48	99	76	92	6
Otu0728	21	Bacteria;Proteobacteria;Gammaproteobacteria;Burkholderiales;Burkholderiaceae;Burkholderiaceae_unclassified;	0	1	1	4	3	2
Otu0729	35	Bacteria;Myxococcota;Myxococcia;Myxococcales;Vulgatibacteraceae;Vulgatibacter;	7	10	1	1	1	2
Otu0730	67	Bacteria;Bacteroidota;Bacteroidia;Chitinophagales;Chitinophagaceae;Parasegetibacter;	14	7	5	11	5	1
Otu0731	33	Archaea;Nanoarchaeota;Nanoarchaeia;Woesearchaeales;SCGC_AAA011-D5;SCGC_AAA011-D5;	0	0	9	13	3	0
Otu0732	19	Bacteria;Actinobacteriota;Acidimicrobiia;Actinomarinales;Actinomarinales_fa;Actinomarinales;	0	3	3	1	0	0
Otu0733	22	Bacteria;Actinobacteriota;Actinobacteria;Pseudonocardiales;Pseudonocardiaceae;Actinomycetospora;	3	3	1	1	5	2
Otu0734	42	Bacteria;Entotheonellaeota;Entotheonellia;Entotheonellales;Entotheonellaceae;Candidatus_Entotheonella;	6	15	1	1	6	4
Otu0735	38	Bacteria;Proteobacteria;Alphaproteobacteria;Rhizobiales;Rhizobiaceae;Chelativorans;	1	4	12	2	1	2
Otu0736	160	Bacteria;Firmicutes;Bacilli;Bacillales;Planococcaceae;Solibacillus;	22	18	14	12	12	9
Otu0737	76	Bacteria;Proteobacteria;Alphaproteobacteria;Parvibaculales;Parvibaculaceae;Parvibaculum;	5	7	17	2	19	1
Otu0738	163	Bacteria;Actinobacteriota;Actinobacteria;Streptosporangiales;Streptosporangiaceae;Nonomuraea;	7	15	17	16	31	6
Otu0739	26	Bacteria;Verrucomicrobiota;Verrucomicrobiae;UA11;UA11_fa;UA11;	3	3	4	5	1	0
Otu0740	37	Bacteria;Bacteroidota;Bacteroidia;Sphingobacteriales;Lentimicrobiaceae;Lentimicrobiaceae;	2	0	3	17	1	0
Otu0741	60	Bacteria;Bacteroidota;Bacteroidia;Flavobacteriales;Weeksellaceae;Moheibacter;	2	6	9	16	13	0
Otu0742	27	Bacteria;Firmicutes;Limnochordia;MBA03;MBA03_fa;MBA03;	6	7	1	0	0	5
Otu0743	41	Bacteria;Actinobacteriota;Actinobacteria;Corynebacteriales;Nocardiaceae;Gordonia;	2	7	5	3	1	2
Otu0744	58	Bacteria;Bacteroidota;Bacteroidia;Chitinophagales;Saprospiraceae;Saprospiraceae_unclassified;	7	3	16	5	1	0
Otu0745	41	Bacteria;Desulfobacterota;Desulfuromonadia;Desulfuromonadia_or;Desulfuromonadia_or_unclassified;Desulfuromonadia_or_unclassified;	5	5	5	3	3	0
Otu0746	34	Bacteria;Proteobacteria;Gammaproteobacteria;Gammaproteobacteria_Incertae_Sedis;Unknown_Family;Unknown_Family;	3	9	3	8	3	2
Otu0747	173	Bacteria;Firmicutes;Bacilli;Aneurinibacillales;Aneurinibacillaceae;Aneurinibacillus;	5	19	14	6	15	2
Otu0748	37	Bacteria;Proteobacteria;Gammaproteobacteria;Burkholderiales;Alcaligenaceae;Pusillimonas;	5	4	8	1	3	0
Otu0749	48	Bacteria;Bacteroidota;Kryptonia;Kryptoniales;BSV26;BSV26;	2	2	3	20	3	0
Otu0750	61	Bacteria;Proteobacteria;Alphaproteobacteria;Thalassobaculales;uncultured;uncultured;	5	3	26	3	8	10
Otu0751	19	Bacteria;Proteobacteria;Alphaproteobacteria;Acetobacterales;Acetobacteraceae;Rhodopila;	0	1	2	7	4	3
Otu0752	20	Bacteria;Proteobacteria;Gammaproteobacteria;Diplorickettsiales;Diplorickettsiaceae;Diplorickettsiaceae_unclassified;	0	0	2	7	1	3
Otu0753	22	Bacteria;Chloroflexi;Ktedonobacteria;Ktedonobacterales;Ktedonobacteraceae;1959-1;	3	3	0	1	6	2
Otu0754	79	Bacteria;Actinobacteriota;Actinobacteria;Micrococcales;Demequinaceae;Demequinaceae_unclassified;	5	10	18	6	7	8
Otu0755	23	Bacteria;Sumerlaeota;Sumerlaeia;uncultured;uncultured_fa;uncultured;	0	3	14	1	0	1
Otu0756	27	Bacteria;Proteobacteria;Alphaproteobacteria;Rhizobiales;Beijerinckiaceae;1174-901-12;	4	8	1	4	2	3
Otu0757	40	Archaea;Halobacterota;Methanomicrobia;Methanomicrobiales;Methanoregulaceae;Methanoregula;	0	1	3	13	4	0
Otu0758	17	Bacteria;Proteobacteria;Alphaproteobacteria;Elsterales;URHD0088;URHD0088;	0	1	1	0	1	2
Otu0759	137	Bacteria;Actinobacteriota;Actinobacteria;Micrococcales;Micrococcaceae;Glutamicibacter;	10	15	9	2	7	20
Otu0760	87	Bacteria;Patescibacteria;Gracilibacteria;Gracilibacteria_unclassified;Gracilibacteria_unclassified;Gracilibacteria_unclassified;	4	2	65	3	3	1
Otu0761	60	Archaea;Halobacterota;Methanomicrobia;Methanomicrobiales;Methanomicrobiales_fa;uncultured;	2	2	11	10	2	0
Otu0762	50	Bacteria;Firmicutes;Desulfotomaculia;Desulfotomaculales;Desulfotomaculales_fa;Pelotomaculum;	12	4	10	1	7	6
Otu0763	96	Bacteria;Chloroflexi;Anaerolineae;uncultured;uncultured_fa;uncultured;	6	28	17	5	0	10
Otu0764	27	Bacteria;Firmicutes;Desulfotomaculia;Desulfotomaculales;Desulfotomaculales_fa;Cryptanaerobacter;	4	3	9	2	1	5
Otu0765	35	Bacteria;Myxococcota;Polyangia;Nannocystales;Nannocystaceae;Pseudenhygromyxa;	7	4	5	6	3	3
Otu0766	17	Bacteria;Proteobacteria;Gammaproteobacteria;Steroidobacterales;Steroidobacteraceae;Steroidobacteraceae;	0	2	2	4	0	0
Otu0767	41	Bacteria;Proteobacteria;Alphaproteobacteria;Rhizobiales;Xanthobacteraceae;Pseudoxanthobacter;	3	7	7	3	3	7
Otu0768	65	Bacteria;Actinobacteriota;Actinobacteria;Streptosporangiales;Thermomonosporaceae;Thermomonospora;	2	6	19	0	4	0
Otu0769	43	Bacteria;Firmicutes;Clostridia;Clostridiales;Clostridiaceae;Clostridium_sensu_stricto_13;	4	6	8	3	8	3
Otu0770	22	Bacteria;Firmicutes;Clostridia;Lachnospirales;Lachnospiraceae;Herbinix;	3	3	0	4	3	2
Otu0771	66	Bacteria;Firmicutes;Clostridia;Clostridiales;Clostridiaceae;Clostridium_sensu_stricto_3;	10	5	3	6	17	7
Otu0772	50	Bacteria;Acidobacteriota;Blastocatellia;Blastocatellales;Blastocatellaceae;Aridibacter;	5	2	2	7	2	8
Otu0773	20	Bacteria;Bacteroidota;Bacteroidia;Bacteroidales;Bacteroidaceae;Bacteroides;	1	1	6	1	3	0
Otu0774	39	Bacteria;Proteobacteria;Gammaproteobacteria;Xanthomonadales;Rhodanobacteraceae;Pseudofulvimonas;	0	4	4	9	5	6
Otu0775	26	Bacteria;Proteobacteria;Alphaproteobacteria;Rhodobacterales;Rhodobacteraceae;Limibaculum;	1	8	1	3	3	3
Otu0776	88	Bacteria;Actinobacteriota;Actinobacteria;Micrococcales;Intrasporangiaceae;Ornithinimicrobium;	14	18	6	21	8	1
Otu0777	24	Bacteria;Firmicutes;Clostridia;Peptostreptococcales-Tissierellales;Anaerovoracaceae;Anaerovoracaceae_unclassified;	1	0	4	4	6	2
Otu0778	115	Bacteria;Actinobacteriota;Actinobacteria;Pseudonocardiales;Pseudonocardiaceae;Actinophytocola;	9	6	11	4	21	21
Otu0779	20	Bacteria;Bacteroidota;Kapabacteria;Kapabacteriales;Kapabacteriales_fa;Kapabacteriales;	2	0	2	4	1	1
Otu0780	30	Bacteria;Proteobacteria;Gammaproteobacteria;Burkholderiales;Burkholderiaceae;Cupriavidus;	1	4	4	1	5	2
Otu0781	20	Bacteria;Chloroflexi;Chloroflexia;Chloroflexales;Chloroflexaceae;Chloronema;	1	6	2	1	0	3
Otu0782	46	Bacteria;Patescibacteria;ABY1;ABY1_unclassified;ABY1_unclassified;ABY1_unclassified;	0	1	14	20	0	1
Otu0783	109	Bacteria;Cyanobacteria;Cyanobacteriia;Leptolyngbyales;Leptolyngbyaceae;MIZ36;	54	6	0	26	2	2
Otu0784	22	Bacteria;Bacteroidota;Bacteroidia;Bacteroidales;Paludibacteraceae;uncultured;	0	2	6	4	0	0
Otu0785	26	Bacteria;Firmicutes;Clostridia;Lachnospirales;Lachnospiraceae;Anaerosporobacter;	4	2	1	2	6	2
Otu0786	39	Bacteria;Firmicutes;Negativicutes;Acidaminococcales;Acidaminococcaceae;uncultured;	1	0	23	4	0	0
Otu0787	111	Bacteria;Proteobacteria;Alphaproteobacteria;Rhizobiales;Rhizobiaceae;Ochrobactrum;	5	6	22	27	11	13
Otu0788	20	Bacteria;Actinobacteriota;Actinobacteria;Frankiales;Sporichthyaceae;Longivirga;	1	3	7	1	1	2
Otu0789	21	Bacteria;Proteobacteria;Gammaproteobacteria;Burkholderiales;Comamonadaceae;Comamonas;	0	3	5	7	0	1
Otu0790	29	Bacteria;Proteobacteria;Alphaproteobacteria;Caulobacterales;Caulobacteraceae;Asticcacaulis;	1	1	0	5	7	5
Otu0791	124	Bacteria;Cyanobacteria;Cyanobacteriia;Cyanobacteriales;Nostocaceae;Nostoc_PCC-7107;	13	5	5	18	0	16
Otu0792	30	Bacteria;Patescibacteria;ABY1;Candidatus_Kerfeldbacteria;Candidatus_Kerfeldbacteria_fa;Candidatus_Kerfeldbacteria;	1	0	12	5	1	1
Otu0793	33	Bacteria;Firmicutes;Clostridia;Peptostreptococcales-Tissierellales;Anaerovoracaceae;Anaerovoracaceae;	0	0	7	16	5	0
Otu0794	33	Bacteria;Actinobacteriota;Actinobacteria;Frankiales;Sporichthyaceae;Sporichthya;	5	6	2	6	1	4
Otu0795	23	Bacteria;Firmicutes;Bacilli;Entomoplasmatales;type_III;type_III;	3	1	0	4	1	1
Otu0796	27	Bacteria;Firmicutes;Bacilli;Paenibacillales;Paenibacillaceae;Thermobacillus;	7	2	4	0	2	2
Otu0797	25	Bacteria;Planctomycetota;Phycisphaerae;MSBL9;GWC2-45-44;GWC2-45-44;	2	3	4	10	1	0
Otu0798	16	Bacteria;Actinobacteriota;Actinobacteria;Micrococcales;Promicromonosporaceae;Promicromonosporaceae_unclassified;	0	2	0	3	2	2
Otu0799	17	Bacteria;Patescibacteria;Berkelbacteria;Berkelbacteria_or;Berkelbacteria_fa;Berkelbacteria;	0	3	3	4	4	0
Otu0800	15	Bacteria;Acidobacteriota;Blastocatellia;Blastocatellales;Blastocatellaceae;Blastocatellaceae;	0	0	1	4	0	0
Otu0801	17	Bacteria;Firmicutes;Bacilli;Lactobacillales;Lactobacillaceae;Lactobacillus;	3	5	0	0	2	1
Otu0802	44	Bacteria;Actinobacteriota;Actinobacteria;Frankiales;Geodermatophilaceae;Modestobacter;	7	4	2	0	10	14
Otu0803	28	Bacteria;Actinobacteriota;Actinobacteria;Pseudonocardiales;Pseudonocardiaceae;Lechevalieria;	5	2	2	1	9	5
Otu0804	38	Bacteria;Proteobacteria;Alphaproteobacteria;Sphingomonadales;Sphingomonadaceae;Sphingosinicella;	2	10	10	5	4	1
Otu0805	21	Bacteria;Planctomycetota;Phycisphaerae;MSBL9;KCLunmb-38-53;KCLunmb-38-53;	1	1	4	10	2	0
Otu0806	17	Bacteria;Bdellovibrionota;Oligoflexia;Oligoflexales;Oligoflexales_unclassified;Oligoflexales_unclassified;	2	2	5	0	4	0
Otu0807	42	Bacteria;Proteobacteria;Alphaproteobacteria;Rhizobiales;Rhizobiaceae;Pseudaminobacter;	0	2	7	7	1	3
Otu0808	61	Bacteria;Cloacimonadota;Cloacimonadia;Cloacimonadales;Cloacimonadaceae;LNR_A2-18;	0	0	22	0	1	0
Otu0809	43	Bacteria;Proteobacteria;Gammaproteobacteria;Oceanospirillales;Pseudohongiellaceae;BIyi10;	4	7	3	4	16	0
Otu0810	18	Bacteria;Acidobacteriota;Subgroup_21;Subgroup_21_or;Subgroup_21_fa;Subgroup_21;	2	1	2	1	2	3
Otu0811	45	Archaea;Halobacterota;Methanomicrobia;Methanomicrobiales;Methanospirillaceae;Methanospirillum;	0	0	6	10	20	0
Otu0812	20	Bacteria;Verrucomicrobiota;Verrucomicrobiae;Opitutales;Puniceicoccaceae;Puniceicoccaceae_unclassified;	0	2	4	5	5	0
Otu0813	71	Bacteria;Firmicutes;Symbiobacteriia;Symbiobacteriales;Symbiobacteraceae;Symbiobacterium;	2	0	6	1	1	0
Otu0814	32	Bacteria;Acidobacteriota;Acidobacteriae;Elev-16S-1166;Elev-16S-1166_fa;Elev-16S-1166;	1	8	5	1	1	5
Otu0815	17	Bacteria;Acidobacteriota;Vicinamibacteria;Vicinamibacterales;Vicinamibacteraceae;Vicinamibacter;	3	4	1	2	4	0
Otu0816	16	Bacteria;Verrucomicrobiota;Verrucomicrobiae;Methylacidiphilales;Methylacidiphilaceae;uncultured;	1	1	2	5	3	0
Otu0817	20	Bacteria;Firmicutes;Desulfotomaculia;Desulfotomaculales;Desulfallas-Sporotomaculum;Desulfallas-Sporotomaculum;	6	4	0	1	1	4
Otu0818	46	Bacteria;Proteobacteria;Gammaproteobacteria;Enterobacterales;Enterobacteriaceae;Enterobacteriaceae_unclassified;	7	7	3	0	3	0
Otu0819	28	Bacteria;Dependentiae;Babeliae;Babeliales;Babeliaceae;Babeliaceae_unclassified;	4	6	1	3	2	0
Otu0820	17	Archaea;Nanoarchaeota;Nanoarchaeia;Woesearchaeales;GW2011_GWC1_47_15;GW2011_GWC1_47_15;	2	1	1	2	3	1
Otu0821	21	Bacteria;Halanaerobiaeota;Halanaerobiia;Halanaerobiales;Halobacteroidaceae;uncultured;	4	5	7	0	0	3
Otu0822	16	Bacteria;Firmicutes;Bacilli;RF39;RF39_fa;RF39;	2	1	5	0	3	0
Otu0823	88	Bacteria;Proteobacteria;Gammaproteobacteria;Burkholderiales;Comamonadaceae;Acidovorax;	2	7	4	4	57	4
Otu0824	32	Bacteria;Planctomycetota;Planctomycetes;Planctomycetales;Rubinisphaeraceae;uncultured;	1	2	5	5	2	2
Otu0825	52	Bacteria;Proteobacteria;Gammaproteobacteria;Burkholderiales;Comamonadaceae;Rubrivivax;	4	8	18	6	1	2
Otu0826	77	Bacteria;Proteobacteria;Gammaproteobacteria;Burkholderiales;Rhodocyclaceae;Sterolibacterium;	0	2	48	1	1	0
Otu0827	15	Bacteria;Bacteroidota;Bacteroidia;Flavobacteriales;Flavobacteriaceae;Citreitalea;	0	1	0	3	0	1
Otu0828	46	Bacteria;Proteobacteria;Gammaproteobacteria;Xanthomonadales;Rhodanobacteraceae;Luteibacter;	19	0	2	0	8	2
Otu0829	22	Bacteria;Chloroflexi;SHA-26;SHA-26_or;SHA-26_fa;SHA-26;	1	6	2	1	5	2
Otu0830	39	Bacteria;Proteobacteria;Alphaproteobacteria;Rhizobiales;Rhizobiales_Incertae_Sedis;Phreatobacter;	4	8	5	3	5	3
Otu0831	26	Bacteria;Bacteroidota;Bacteroidia;Chitinophagales;uncultured;uncultured;	1	0	4	1	5	0
Otu0832	37	Bacteria;Proteobacteria;Gammaproteobacteria;1013-28-CG33;1013-28-CG33_fa;1013-28-CG33;	3	0	7	5	6	2
Otu0833	16	Bacteria;Firmicutes;Desulfitobacteriia;Desulfitobacteriales;Desulfitobacteriaceae;Desulfitobacterium;	2	2	0	1	1	1
Otu0834	40	Bacteria;Bacteroidota;Bacteroidia;Sphingobacteriales;Sphingobacteriaceae;Parapedobacter;	0	0	0	1	1	0
Otu0835	30	Bacteria;Verrucomicrobiota;Verrucomicrobiae;Verrucomicrobiales;Rubritaleaceae;Rubritaleaceae_unclassified;	2	1	3	9	1	0
Otu0836	15	Bacteria;Elusimicrobiota;Elusimicrobia;Lineage_IV;Lineage_IV_fa;Lineage_IV;	1	5	1	1	2	1
Otu0837	23	Bacteria;Firmicutes;Clostridia;Peptostreptococcales-Tissierellales;Peptostreptococcales-Tissierellales_fa;Tissierella;	5	4	0	3	1	1
Otu0838	15	Bacteria;Proteobacteria;Gammaproteobacteria;Enterobacterales;Enterobacterales_unclassified;Enterobacterales_unclassified;	1	1	3	2	1	0
Otu0839	58	Bacteria;Proteobacteria;Alphaproteobacteria;Defluviicoccales;uncultured;uncultured;	4	8	7	9	9	8
Otu0840	19	Bacteria;Proteobacteria;Alphaproteobacteria;Rickettsiales;Rickettsiaceae;Rickettsiaceae_unclassified;	3	2	3	0	6	0
Otu0841	19	Bacteria;Desulfobacterota;Syntrophia;Syntrophales;Syntrophales_unclassified;Syntrophales_unclassified;	0	3	6	3	1	0
Otu0842	15	Archaea;Nanoarchaeota;Nanoarchaeia;Woesearchaeales;Woesearchaeales_fa;Woesearchaeales;	0	1	2	6	1	0
Otu0843	28	Bacteria;Verrucomicrobiota;Verrucomicrobiae;Opitutales;Puniceicoccaceae;Verruc-01;	2	5	1	6	3	0
Otu0844	16	Bacteria;Bacteroidota;Bacteroidia;Sphingobacteriales;Sphingobacteriaceae;Nubsella;	3	0	0	4	0	0
Otu0845	23	Bacteria;Patescibacteria;Patescibacteria_unclassified;Patescibacteria_unclassified;Patescibacteria_unclassified;Patescibacteria_unclassified;	2	2	4	4	2	2
Otu0846	18	Bacteria;Firmicutes;Clostridia;Oscillospirales;Oscillospiraceae;NK4A214_group;	3	3	3	1	1	1
Otu0847	41	Bacteria;Bacteroidota;Bacteroidia;Sphingobacteriales;KD3-93;KD3-93;	1	2	7	0	0	0
Otu0848	34	Bacteria;Bacteroidota;Bacteroidia;Bacteroidales;Dysgonomonadaceae;Proteiniphilum;	0	0	10	1	0	0
Otu0849	30	Bacteria;Bacteroidota;Bacteroidia;Cytophagales;Spirosomaceae;Leadbetterella;	4	1	5	1	11	0
Otu0850	14	Bacteria;Actinobacteriota;Thermoleophilia;Solirubrobacterales;Solirubrobacteraceae;JCM_18997;	0	3	1	2	0	0
Otu0851	27	Bacteria;Proteobacteria;Alphaproteobacteria;Rhodospirillales;Magnetospiraceae;uncultured;	3	4	3	1	2	3
Otu0852	20	Bacteria;Acidobacteriota;Acidobacteriae;Subgroup_13;Subgroup_13_fa;Subgroup_13;	2	3	2	2	2	1
Otu0853	17	Bacteria;Firmicutes;Limnochordia;M55-D21;M55-D21_fa;M55-D21;	6	1	2	1	1	4
Otu0854	17	Bacteria;Firmicutes;Syntrophomonadia;Syntrophomonadales;Syntrophomonadaceae;uncultured;	2	3	2	1	1	1
Otu0855	84	Bacteria;Actinobacteriota;Actinobacteria;Streptomycetales;Streptomycetaceae;Kitasatospora;	15	2	6	7	9	22
Otu0856	54	Bacteria;Bacteroidota;Bacteroidia;Bacteroidales;Marinilabiliaceae;Marinilabiliaceae;	0	0	0	1	49	1
Otu0857	28	Bacteria;Actinobacteriota;Actinobacteria;Pseudonocardiales;Pseudonocardiaceae;Saccharopolyspora;	0	2	5	2	5	3
Otu0858	21	Bacteria;Proteobacteria;Gammaproteobacteria;Burkholderiales;Oxalobacteraceae;Duganella;	3	1	1	0	6	0
Otu0859	15	Bacteria;Patescibacteria;Microgenomatia;Candidatus_Collierbacteria;Candidatus_Collierbacteria_fa;Candidatus_Collierbacteria;	3	1	4	1	0	0
Otu0860	38	Bacteria;Proteobacteria;Alphaproteobacteria;Rhizobiales;Rhizobiales_Incertae_Sedis;Alsobacter;	10	2	3	3	6	4
Otu0861	37	Bacteria;Actinobacteriota;Actinobacteria;Pseudonocardiales;Pseudonocardiaceae;Kutzneria;	4	2	2	2	6	5
Otu0862	21	Bacteria;Bacteroidota;Bacteroidia;Bacteroidales;Prolixibacteraceae;BSV13;	1	2	3	5	5	0
Otu0863	23	Bacteria;Bacteroidota;Ignavibacteria;Ignavibacteriales;UA-50;UA-50;	1	2	0	9	1	0
Otu0864	17	Bacteria;Elusimicrobiota;Endomicrobia;Endomicrobiales;Endomicrobiaceae;Endomicrobium;	1	0	2	5	4	1
Otu0865	27	Bacteria;Proteobacteria;Gammaproteobacteria;JG36-GS-52;JG36-GS-52_fa;JG36-GS-52;	2	7	5	3	4	2
Otu0866	14	Bacteria;Proteobacteria;Gammaproteobacteria;Burkholderiales;Hydrogenophilaceae;Thiobacillus;	0	0	5	1	1	0
Otu0867	17	Bacteria;Firmicutes;Moorellia;Desulfitibacterales;Desulfitibacteraceae;Desulfitibacter;	2	3	2	0	3	1
Otu0868	34	Bacteria;Proteobacteria;Alphaproteobacteria;Rhodobacterales;Rhodobacteraceae;Gemmobacter;	4	1	8	5	11	0
Otu0869	75	Bacteria;Acidobacteriota;Blastocatellia;Blastocatellales;Blastocatellaceae;uncultured;	14	12	7	12	6	0
Otu0870	13	Bacteria;Proteobacteria;Alphaproteobacteria;Rhizobiales;Beijerinckiaceae;Methylosinus;	0	3	3	1	1	1
Otu0871	27	Bacteria;Proteobacteria;Alphaproteobacteria;Rhizobiales;Beijerinckiaceae;alphaI_cluster;	4	2	2	6	5	2
Otu0872	14	Bacteria;Firmicutes;Clostridia;Clostridiales;Caloramatoraceae;Caloramatoraceae_unclassified;	0	1	1	2	0	1
Otu0873	13	Bacteria;Proteobacteria;Alphaproteobacteria;Sphingomonadales;Sphingomonadaceae;Parablastomonas;	0	0	3	3	0	0
Otu0874	34	Bacteria;Desulfobacterota;Desulfovibrionia;Desulfovibrionales;Desulfovibrionaceae;Desulfovibrio;	2	4	8	0	15	3
Otu0875	16	Bacteria;Bacteroidota;Bacteroidia;Chitinophagales;Chitinophagaceae;Pseudoflavitalea;	1	1	4	3	0	0
Otu0876	20	Bacteria;Myxococcota;Polyangia;Polyangiales;Eel-36e1D6;Eel-36e1D6;	3	2	3	1	3	2
Otu0877	13	Bacteria;Firmicutes;Bacilli;Lactobacillales;Streptococcaceae;Streptococcus;	1	2	0	2	3	0
Otu0878	69	Bacteria;Desulfobacterota;Desulfovibrionia;Desulfovibrionales;Desulfomicrobiaceae;Desulfomicrobium;	0	5	8	6	43	1
Otu0879	18	Bacteria;Actinobacteriota;Actinobacteria;Propionibacteriales;Propionibacteriaceae;Haloactinopolyspora;	1	4	0	1	2	1
Otu0880	16	Bacteria;Firmicutes;Clostridia;Oscillospirales;Oscillospirales_fa;Oscillospirales;	1	2	1	0	2	5
Otu0881	29	Bacteria;Patescibacteria;Gracilibacteria;Gracilibacteria_or;Gracilibacteria_fa;Gracilibacteria;	1	1	13	1	6	0
Otu0882	24	Bacteria;Chloroflexi;Ktedonobacteria;Ktedonobacterales;Ktedonobacteraceae;BacC-u-018;	3	3	1	0	1	2
Otu0883	25	Bacteria;Verrucomicrobiota;Verrucomicrobiae;Chthoniobacterales;Chthoniobacteraceae;Chthoniobacteraceae;	0	5	4	3	3	0
Otu0884	45	Bacteria;Actinobacteriota;Actinobacteria;Micromonosporales;Micromonosporaceae;Dactylosporangium;	9	3	1	2	8	9
Otu0885	24	Bacteria;Desulfobacterota;Desulfuromonadia;PB19;PB19_fa;PB19;	0	3	17	1	1	1
Otu0886	78	Bacteria;Bacteroidota;Bacteroidia;Bacteroidales;Dysgonomonadaceae;Dysgonomonadaceae_unclassified;	5	5	21	7	20	1
Otu0887	13	Bacteria;Proteobacteria;Alphaproteobacteria;Caulobacterales;Caulobacterales_unclassified;Caulobacterales_unclassified;	1	3	3	0	0	0
Otu0888	36	Bacteria;Myxococcota;Myxococcia;Myxococcales;Myxococcaceae;Myxococcus;	4	1	0	3	5	5
Otu0889	93	Bacteria;Acidobacteriota;Acidobacteriae;Acidobacteriales;Acidobacteriaceae_(Subgroup_1);Granulicella;	12	8	9	10	13	10
Otu0890	25	Bacteria;Firmicutes;Clostridia;Peptostreptococcales-Tissierellales;Anaerovoracaceae;Mogibacterium;	1	2	10	2	4	1
Otu0891	20	Bacteria;Bacteroidota;Bacteroidia;Flavobacteriales;Crocinitomicaceae;Crocinitomix;	0	1	5	4	1	0
Otu0892	48	Bacteria;Actinobacteriota;Actinobacteria;Micromonosporales;Micromonosporaceae;Virgisporangium;	4	10	3	1	23	5
Otu0893	37	Bacteria;Proteobacteria;Alphaproteobacteria;Rhizobiales;Beijerinckiaceae;Chelatococcus;	2	7	10	1	1	3
Otu0894	12	Bacteria;Proteobacteria;Alphaproteobacteria;Rickettsiales;Rickettsiaceae;Candidatus_Megaira;	0	0	2	1	2	0
Otu0895	18	Bacteria;Proteobacteria;Alphaproteobacteria;Micavibrionales;Micavibrionaceae;uncultured;	1	2	7	2	3	1
Otu0896	86	Bacteria;Firmicutes;Bacilli;Exiguobacterales;Exiguobacteraceae;Exiguobacterium;	17	21	8	1	1	3
Otu0897	12	Bacteria;Actinobacteriota;Actinobacteria;Streptosporangiales;Thermomonosporaceae;uncultured;	0	0	0	0	0	1
Otu0898	28	Bacteria;Actinobacteriota;Actinobacteria;Frankiales;Frankiales_fa;Frankiales;	1	5	4	4	0	5
Otu0899	21	Bacteria;Proteobacteria;Gammaproteobacteria;Salinisphaerales;Solimonadaceae;Solimonadaceae_unclassified;	3	0	1	1	0	1
Otu0900	19	Bacteria;Chloroflexi;Dehalococcoidia;vadinBA26;vadinBA26_fa;vadinBA26;	1	0	4	0	1	0
Otu0901	22	Bacteria;Planctomycetota;Pla3_lineage;Pla3_lineage_or;Pla3_lineage_fa;Pla3_lineage;	7	2	2	3	2	2
Otu0902	55	Bacteria;Bacteroidota;Bacteroidia;Sphingobacteriales;Lentimicrobiaceae;Lentimicrobium;	6	0	15	8	2	0
Otu0903	56	Bacteria;Cyanobacteria;Cyanobacteriia;Oxyphotobacteria_Incertae_Sedis;Unknown_Family;Phormidium_SAG_37.90;	15	0	0	31	0	1
Otu0904	49	Bacteria;Bacteroidota;Bacteroidia;Chitinophagales;Chitinophagaceae;Dinghuibacter;	3	4	8	6	3	0
Otu0905	18	Bacteria;Bacteroidota;Bacteroidia;Sphingobacteriales;Sphingobacteriaceae;Solitalea;	2	0	7	0	0	0
Otu0906	53	Bacteria;Proteobacteria;Gammaproteobacteria;Oceanospirillales;Alcanivoracaceae;Ketobacter;	4	1	13	2	14	2
Otu0907	13	Bacteria;Actinobacteriota;Actinobacteria;Micromonosporales;Micromonosporaceae;Planosporangium;	1	0	0	3	5	0
Otu0908	16	Bacteria;Bacteroidota;Bacteroidia;Cytophagales;Cyclobacteriaceae;uncultured;	4	0	4	3	3	0
Otu0909	29	Bacteria;Proteobacteria;Alphaproteobacteria;Rhizobiales;Rhizobiaceae;Aquamicrobium;	0	4	11	4	3	1
Otu0910	23	Bacteria;Planctomycetota;Phycisphaerae;MSBL9;4572-13;4572-13;	1	1	12	6	2	0
Otu0911	20	Bacteria;Proteobacteria;Alphaproteobacteria;Caulobacterales;Hyphomonadaceae;Hyphomonas;	1	2	4	2	4	0
Otu0912	17	Bacteria;Firmicutes;Bacilli;Acholeplasmatales;Acholeplasmataceae;Acholeplasma;	0	0	6	0	2	0
Otu0913	32	Bacteria;Bacteroidota;Ignavibacteria;Ignavibacteriales;BSV40;BSV40;	2	1	4	1	19	0
Otu0914	52	Bacteria;Actinobacteriota;Actinobacteria;Propionibacteriales;Nocardioidaceae;Tenggerimyces;	1	1	0	0	0	3
Otu0915	12	Bacteria;Firmicutes;Clostridia;Clostridiales;Clostridiales_unclassified;Clostridiales_unclassified;	0	0	1	1	3	0
Otu0916	12	Bacteria;Acidobacteriota;Acidobacteriae;TSBb06;TSBb06_fa;TSBb06;	0	0	1	3	0	0
Otu0917	118	Bacteria;Proteobacteria;Gammaproteobacteria;Burkholderiales;Rhodocyclaceae;Denitratisoma;	1	0	53	12	0	0
Otu0918	44	Bacteria;Proteobacteria;Gammaproteobacteria;Burkholderiales;Rhodocyclaceae;Azospira;	0	0	20	0	1	0
Otu0919	110	Bacteria;Patescibacteria;ABY1;Candidatus_Komeilibacteria;Candidatus_Komeilibacteria_fa;Candidatus_Komeilibacteria;	1	0	98	5	0	0
Otu0920	15	Bacteria;Proteobacteria;Alphaproteobacteria;Paracaedibacterales;Paracaedibacteraceae;Candidatus_Paracaedibacter;	2	1	3	2	5	0
Otu0921	51	Bacteria;Bacteroidota;Bacteroidia;Cytophagales;Cyclobacteriaceae;Algoriphagus;	13	9	4	6	2	1
Otu0922	17	Bacteria;Patescibacteria;Microgenomatia;Microgenomatia_unclassified;Microgenomatia_unclassified;Microgenomatia_unclassified;	6	3	2	2	0	0
Otu0923	45	Bacteria;Proteobacteria;Gammaproteobacteria;Burkholderiales;Alcaligenaceae;Bordetella;	3	1	1	2	0	1
Otu0924	15	Bacteria;Patescibacteria;Parcubacteria;Candidatus_Zambryskibacteria;Candidatus_Zambryskibacteria_fa;Candidatus_Zambryskibacteria;	2	0	6	0	0	2
Otu0925	19	Bacteria;Myxococcota;Polyangia;Polyangiales;Sandaracinaceae;Sandaracinaceae_unclassified;	2	0	1	0	3	1
Otu0926	23	Bacteria;Firmicutes;Clostridia;Peptococcales;Peptococcaceae;Peptococcaceae_unclassified;	5	3	4	0	0	0
Otu0927	22	Bacteria;Proteobacteria;Alphaproteobacteria;Rhizobiales;Devosiaceae;Pelagibacterium;	1	4	3	3	0	0
Otu0928	19	Bacteria;Proteobacteria;Alphaproteobacteria;Rhizobiales;Beijerinckiaceae;Psychroglaciecola;	3	2	2	1	1	2
Otu0929	17	Bacteria;Verrucomicrobiota;Verrucomicrobiae;LD1-PB3;LD1-PB3_fa;LD1-PB3;	0	0	11	3	0	0
Otu0930	11	Bacteria;Firmicutes;Clostridia;Thermincolales;Thermincolaceae;Thermincola;	1	1	2	0	0	2
Otu0931	13	Bacteria;Firmicutes;Bacilli;Bacillales;Bacillaceae;Oceanobacillus;	2	2	0	1	2	0
Otu0932	28	Bacteria;Proteobacteria;Alphaproteobacteria;Rhizobiales;Xanthobacteraceae;Blastochloris;	1	0	13	2	2	2
Otu0933	11	Bacteria;Actinobacteriota;Actinobacteria;Streptomycetales;Streptomycetaceae;Streptomycetaceae;	0	0	0	0	1	0
Otu0934	12	Bacteria;Firmicutes;Clostridia;Clostridiales;Oxobacteraceae;Oxobacter;	0	1	4	0	4	0
Otu0935	54	Bacteria;Bacteroidota;Bacteroidia;Sphingobacteriales;Sphingobacteriaceae;Anseongella;	0	0	0	0	26	0
Otu0936	15	Bacteria;Proteobacteria;Gammaproteobacteria;Burkholderiales;A21b;A21b;	1	5	0	0	3	1
Otu0937	48	Bacteria;Bacteroidota;Bacteroidia;Flavobacteriales;Flavobacteriaceae;Muricauda;	0	2	28	0	1	3
Otu0938	12	Bacteria;Gemmatimonadota;AKAU4049;AKAU4049_or;AKAU4049_fa;AKAU4049;	0	0	0	3	3	0
Otu0939	16	Bacteria;Patescibacteria;Microgenomatia;Candidatus_Levybacteria;Candidatus_Levybacteria_fa;Candidatus_Levybacteria;	2	2	4	3	3	0
Otu0940	15	Bacteria;Verrucomicrobiota;Verrucomicrobiae;Opitutales;Opitutaceae;uncultured;	1	2	2	3	1	0
Otu0941	19	Bacteria;Proteobacteria;Alphaproteobacteria;Caulobacterales;Parvularculaceae;Amphiplicatus;	2	0	0	1	2	3
Otu0942	28	Bacteria;Firmicutes;Bacilli;Thermoactinomycetales;Thermoactinomycetaceae;Novibacillus;	1	3	0	0	2	19
Otu0943	36	Bacteria;Proteobacteria;Alphaproteobacteria;Acetobacterales;Elioraeaceae;Elioraea;	0	5	3	4	3	2
Otu0944	48	Bacteria;Proteobacteria;Gammaproteobacteria;Aeromonadales;Aeromonadaceae;Aeromonas;	0	2	3	0	1	2
Otu0945	73	Bacteria;Actinobacteriota;Actinobacteria;Micrococcales;Microbacteriaceae;Leifsonia;	12	16	8	6	4	15
Otu0946	11	Bacteria;Chloroflexi;Chloroflexia;Chloroflexia_unclassified;Chloroflexia_unclassified;Chloroflexia_unclassified;	0	0	0	1	0	1
Otu0947	67	Bacteria;Bacteroidota;Bacteroidia;Flavobacteriales;Flavobacteriaceae;Planktosalinus;	11	6	10	19	3	1
Otu0948	47	Bacteria;Proteobacteria;Alphaproteobacteria;Rhizobiales;Rhizobiaceae;Aureimonas;	1	29	0	5	9	1
Otu0949	26	Bacteria;Actinobacteriota;Actinobacteria;Micrococcales;Micrococcaceae;Arthrobacter;	1	4	2	3	3	1
Otu0950	12	Bacteria;Desulfobacterota;Desulfuromonadia;Geobacterales;Geobacteraceae;Geobacteraceae_unclassified;	1	0	1	0	4	0
Otu0951	12	Bacteria;Firmicutes;Clostridia;Peptococcales;Peptococcaceae;uncultured;	0	0	6	1	2	0
Otu0952	35	Bacteria;Bacteroidota;Bacteroidia;Chitinophagales;Chitinophagaceae;Sediminibacterium;	7	5	2	3	10	1
Otu0953	32	Bacteria;Bacteroidota;Bacteroidia;Chitinophagales;Chitinophagaceae;Rurimicrobium;	0	1	10	2	0	0
Otu0954	17	Bacteria;Bacteroidota;Bacteroidia;Sphingobacteriales;Sphingobacteriaceae;Olivibacter;	1	0	0	1	0	3
Otu0955	12	Bacteria;Proteobacteria;Alphaproteobacteria;Rhizobiales;Rhizobiales_Incertae_Sedis;Rhizobiales_Incertae_Sedis_unclassified;	0	1	1	2	0	1
Otu0956	63	Bacteria;Hydrogenedentes;Hydrogenedentia;Hydrogenedentiales;Hydrogenedensaceae;YC-ZSS-LKJ63;	0	5	23	13	13	2
Otu0957	14	Bacteria;Actinobacteriota;Actinobacteria;Bifidobacteriales;Bifidobacteriaceae;Bifidobacterium;	2	3	0	0	1	0
Otu0958	16	Bacteria;Proteobacteria;Alphaproteobacteria;Azospirillales;Azospirillaceae;uncultured;	1	1	4	2	3	1
Otu0959	12	Bacteria;Patescibacteria;Gracilibacteria;Candidatus_Peribacteria;Candidatus_Peribacteria_fa;Candidatus_Peribacteria;	0	1	5	2	0	1
Otu0960	45	Bacteria;Firmicutes;Bacilli;Thermoactinomycetales;Thermoactinomycetaceae;Thermoflavimicrobium;	2	0	36	2	0	1
Otu0961	15	Bacteria;Patescibacteria;Microgenomatia;Candidatus_Amesbacteria;Candidatus_Amesbacteria_fa;Candidatus_Amesbacteria;	1	0	1	3	4	0
Otu0962	19	Bacteria;Proteobacteria;Gammaproteobacteria;Acidiferrobacterales;Acidiferrobacteraceae;Sulfurifustis;	2	3	3	2	4	1
Otu0963	18	Bacteria;Acidobacteriota;FFCH5909;FFCH5909_or;FFCH5909_fa;FFCH5909;	2	0	3	4	2	5
Otu0964	29	Bacteria;Firmicutes;Clostridia;Clostridiales;Clostridiaceae;Proteiniclasticum;	1	3	5	0	0	1
Otu0965	16	Bacteria;Firmicutes;Clostridia;Lachnospirales;Lachnospirales_unclassified;Lachnospirales_unclassified;	1	0	0	1	4	0
Otu0966	47	Bacteria;Cyanobacteria;Cyanobacteriia;Cyanobacteriales;Phormidiaceae;uncultured;	30	2	1	9	0	0
Otu0967	15	Bacteria;Verrucomicrobiota;Verrucomicrobiae;Verrucomicrobiales;Verrucomicrobiaceae;Verrucomicrobiaceae_unclassified;	1	1	1	3	2	0
Otu0968	30	Archaea;Halobacterota;Methanomicrobia;Methanomicrobiales;Methanomicrobiaceae;Methanofollis;	0	2	4	4	2	1
Otu0969	33	Bacteria;Patescibacteria;Kazania;Kazania_or;Kazania_fa;Kazania;	4	1	0	13	3	2
Otu0970	11	Bacteria;Fibrobacterota;Fibrobacteria;Fibrobacterales;Fibrobacterales_unclassified;Fibrobacterales_unclassified;	0	0	1	2	0	0
Otu0971	12	Bacteria;Bacteroidota;Bacteroidia;Sphingobacteriales;Sphingobacteriaceae;Pelobium;	0	1	2	0	1	0
Otu0972	169	Bacteria;Proteobacteria;Alphaproteobacteria;Rhizobiales;Rhizobiaceae;Brucella;	21	19	4	15	2	17
Otu0973	21	Bacteria;Proteobacteria;Alphaproteobacteria;Rhizobiales;Xanthobacteraceae;Rhodopseudomonas;	1	8	0	3	3	0
Otu0974	14	Bacteria;Patescibacteria;Parcubacteria;Candidatus_Vogelbacteria;Candidatus_Vogelbacteria_fa;Candidatus_Vogelbacteria;	0	0	4	3	1	0
Otu0975	19	Bacteria;Proteobacteria;Gammaproteobacteria;Xanthomonadales;Rhodanobacteraceae;Tahibacter;	5	1	1	2	1	2
Otu0976	16	Bacteria;Firmicutes;Clostridia;Oscillospirales;Ethanoligenenaceae;Incertae_Sedis;	0	0	1	2	2	0
Otu0977	20	Bacteria;Firmicutes;Bacilli;Thermoactinomycetales;Thermoactinomycetaceae;Shimazuella;	2	0	3	3	1	1
Otu0978	115	Bacteria;Bacteroidota;Bacteroidia;Bacteroidales;Marinilabiliaceae;Marinilabiliaceae_unclassified;	0	0	1	0	111	0
Otu0979	11	Bacteria;Cyanobacteria;Cyanobacteriia;Leptolyngbyales;Leptolyngbyaceae;Leptolyngbya_Es-Yyy1000;	2	0	0	3	2	1
Otu0980	15	Bacteria;FCPU426;FCPU426_cl;FCPU426_or;FCPU426_fa;FCPU426;	1	1	2	2	1	0
Otu0981	26	Bacteria;Proteobacteria;Gammaproteobacteria;Burkholderiales;Gallionellaceae;Gallionellaceae_unclassified;	1	0	1	3	1	0
Otu0982	43	Bacteria;Actinobacteriota;Acidimicrobiia;Acidimicrobiales;Acidimicrobiaceae;uncultured;	1	2	0	4	8	4
Otu0983	12	Bacteria;Acidobacteriota;Acidobacteriae;Acidobacteriales;Acidobacteriaceae_(Subgroup_1);Occallatibacter;	1	1	0	1	1	1
Otu0984	13	Bacteria;Proteobacteria;Alphaproteobacteria;Rickettsiales;AB1;AB1;	0	1	2	2	1	4
Otu0985	20	Bacteria;Proteobacteria;Gammaproteobacteria;Methylococcales;Methylococcaceae;Methyloparacoccus;	1	0	6	4	1	0
Otu0986	66	Bacteria;Planctomycetota;Phycisphaerae;Phycisphaerales;Phycisphaeraceae;Urania-1B-19_marine_sediment_group;	2	0	17	1	1	0
Otu0987	15	Bacteria;Acidobacteriota;Acidobacteriae;AKIW659;AKIW659_fa;AKIW659;	1	3	4	1	0	0
Otu0988	12	Bacteria;Actinobacteriota;Actinobacteria;Micrococcales;Micrococcaceae;Kocuria;	1	1	1	1	2	1
Otu0989	37	Bacteria;Proteobacteria;Alphaproteobacteria;Azospirillales;Azospirillales_Incertae_Sedis;Stella;	6	2	13	1	3	3
Otu0990	14	Bacteria;Proteobacteria;Gammaproteobacteria;Burkholderiales;Comamonadaceae;Rhizobacter;	0	4	1	2	0	0
Otu0991	13	Bacteria;Halanaerobiaeota;Halanaerobiia;Halanaerobiales;Halanaerobiaceae;Halocella;	2	5	1	3	0	1
Otu0992	25	Bacteria;Firmicutes;Bacilli;Paenibacillales;Paenibacillaceae;Ammoniphilus;	3	3	2	1	7	0
Otu0993	12	Bacteria;Planctomycetota;Pla4_lineage;Pla4_lineage_or;Pla4_lineage_fa;Pla4_lineage;	1	1	4	3	0	0
Otu0994	15	Bacteria;Latescibacterota;Latescibacteria;Latescibacterales;Latescibacteraceae;Candidatus_Latescibacter;	1	0	5	0	3	0
Otu0995	11	Bacteria;Bacteroidota;Bacteroidia;Bacteroidales;Muribaculaceae;Muribaculaceae;	0	4	2	0	3	0
Otu0996	11	Bacteria;Proteobacteria;Alphaproteobacteria;Micropepsales;Micropepsaceae;Micropepsis;	2	0	3	0	0	4
Otu0997	22	Archaea;Halobacterota;Methanocellia;Methanocellales;Methanocellaceae;Methanocella;	1	0	0	3	1	0
Otu0998	12	Bacteria;Proteobacteria;Gammaproteobacteria;Salinisphaerales;Solimonadaceae;Panacagrimonas;	3	0	0	2	0	1
Otu0999	13	Bacteria;Actinobacteriota;Actinobacteria;Micrococcales;Bogoriellaceae;Georgenia;	0	4	1	2	2	1
Otu1000	10	Bacteria;Planctomycetota;Planctomycetes;Isosphaerales;Isosphaeraceae;Candidatus_Nostocoida;	0	0	1	1	0	1
Otu1001	13	Bacteria;Bdellovibrionota;Bdellovibrionia;Bacteriovoracales;Bacteriovoracaceae;Bacteriovorax;	1	0	3	1	1	0
Otu1002	12	Bacteria;Firmicutes;Clostridia;Clostridiales;Clostridiaceae;Clostridium_sensu_stricto_8;	3	4	0	1	1	0
Otu1003	14	Bacteria;Dependentiae;Babeliae;Babeliales;Babeliales_fa;Babeliales;	0	2	0	5	1	0
Otu1004	31	Bacteria;Spirochaetota;Spirochaetia;Spirochaetales;Spirochaetaceae;Salinispira;	0	1	12	7	0	0
Otu1005	35	Bacteria;Firmicutes;Bacilli;Erysipelotrichales;Erysipelatoclostridiaceae;UCG-004;	0	0	8	2	4	0
Otu1006	12	Bacteria;Elusimicrobiota;Elusimicrobia;MVP-88;MVP-88_fa;MVP-88;	1	1	2	1	4	0
Otu1007	10	Bacteria;Bacteroidota;Bacteroidia;Cytophagales;Cyclobacteriaceae;Cyclobacteriaceae_unclassified;	1	1	0	1	0	1
Otu1008	17	Bacteria;Bacteroidota;Bacteroidia;Cytophagales;Cytophagaceae;Sporocytophaga;	2	7	5	0	0	0
Otu1009	11	Bacteria;Verrucomicrobiota;Verrucomicrobiae;Pedosphaerales;Pedosphaeraceae;DEV008;	0	0	1	1	2	0
Otu1010	19	Archaea;Crenarchaeota;Nitrososphaeria;Nitrososphaerales;Nitrososphaeraceae;Nitrososphaeraceae;	2	3	0	3	1	0
Otu1011	17	Bacteria;Bacteroidota;Bacteroidia;Cytophagales;Spirosomaceae;Larkinella;	1	1	1	3	0	0
Otu1012	15	Bacteria;Firmicutes;Clostridia;Clostridiales;Clostridiaceae;Clostridium_sensu_stricto_18;	1	4	0	0	1	0
Otu1013	12	Bacteria;Firmicutes;Clostridia;Oscillospirales;Ruminococcaceae;CAG-352;	1	0	1	2	4	1
Otu1014	16	Bacteria;Proteobacteria;Alphaproteobacteria;Rickettsiales;Rickettsiaceae;uncultured;	0	1	7	2	1	1
Otu1015	23	Bacteria;Acidobacteriota;Aminicenantia;Aminicenantales;Aminicenantales_fa;Aminicenantales;	0	2	0	11	3	0
Otu1016	39	Bacteria;Proteobacteria;Gammaproteobacteria;Gammaproteobacteria_Incertae_Sedis;Unknown_Family;uncultured;	1	2	14	1	4	0
Otu1017	20	Bacteria;Cyanobacteria;Cyanobacteriia;Leptolyngbyales;Leptolyngbyaceae;YB-42;	8	1	0	3	0	1
Otu1018	9	Bacteria;Bdellovibrionota;Oligoflexia;Silvanigrellales;Silvanigrellaceae;Silvanigrella;	1	2	3	1	0	0
Otu1019	9	Bacteria;Actinobacteriota;Actinobacteria;Streptomycetales;Streptomycetaceae;Allostreptomyces;	2	1	1	0	1	0
Otu1020	9	Bacteria;WS4;WS4_cl;WS4_or;WS4_fa;WS4;	2	2	1	0	1	3
Otu1021	22	Bacteria;Proteobacteria;Alphaproteobacteria;Puniceispirillales;Puniceispirillales_Incertae_Sedis;Constrictibacter;	3	8	1	1	1	3
Otu1022	10	Bacteria;Proteobacteria;Gammaproteobacteria;Gammaproteobacteria_Incertae_Sedis;Unknown_Family;Unknown_Family_unclassified;	1	2	2	1	0	1
Otu1023	17	Bacteria;Acidobacteriota;Acidobacteriae;Acidobacteriales;Acidobacteriaceae_(Subgroup_1);Acidipila;	0	0	4	4	2	2
Otu1024	39	Bacteria;Bacteroidota;Bacteroidia;Cytophagales;Microscillaceae;OLB12;	1	1	6	14	1	0
Otu1025	11	Bacteria;Firmicutes;Symbiobacteriia;Symbiobacteriales;Symbiobacteraceae;Symbiobacteraceae_unclassified;	3	0	2	0	1	1
Otu1026	10	Bacteria;Proteobacteria;Gammaproteobacteria;Burkholderiales;Comamonadaceae;Ideonella;	0	0	3	0	1	0
Otu1027	14	Bacteria;Actinobacteriota;Actinobacteria;Micrococcales;Promicromonosporaceae;Promicromonospora;	2	3	2	0	1	1
Otu1028	31	Bacteria;Proteobacteria;Gammaproteobacteria;Burkholderiales;Comamonadaceae;Aquabacterium;	0	1	13	2	8	1
Otu1029	9	Archaea;Euryarchaeota;Thermococci;Methanofastidiosales;Methanofastidiosaceae;Candidatus_Methanofastidiosum;	0	0	3	0	0	0
Otu1030	25	Bacteria;Chloroflexi;Anaerolineae;ADurb.Bin180;ADurb.Bin180_fa;ADurb.Bin180;	1	1	7	4	0	1
Otu1031	10	Bacteria;Proteobacteria;Alphaproteobacteria;Paracaedibacterales;Paracaedibacteraceae;Candidatus_Captivus;	1	4	1	1	0	0
Otu1032	11	Bacteria;Cyanobacteria;Vampirivibrionia;Vampirovibrionales;Vampirovibrionaceae;Vampirovibrio;	1	2	3	2	2	1
Otu1033	15	Bacteria;Bacteroidota;Bacteroidia;Bacteroidales;M2PB4-65_termite_group;M2PB4-65_termite_group;	0	0	9	0	0	0
Otu1034	9	Bacteria;Firmicutes;Clostridia;Clostridia_or;Hungateiclostridiaceae;UCG-012;	2	1	1	0	0	0
Otu1035	36	Bacteria;Actinobacteriota;Actinobacteria;Streptosporangiales;Streptosporangiaceae;Sphaerisporangium;	7	0	4	4	3	1
Otu1036	9	Bacteria;Firmicutes;D8A-2;D8A-2_or;D8A-2_fa;D8A-2;	3	1	2	0	0	1
Otu1037	14	Bacteria;Proteobacteria;Alphaproteobacteria;Kiloniellales;Kiloniellaceae;Tagaea;	2	4	4	2	0	1
Otu1038	12	Bacteria;Chloroflexi;Dehalococcoidia;GIF9;GIF9_fa;GIF9;	0	0	3	4	0	0
Otu1039	9	Bacteria;Actinobacteriota;Thermoleophilia;Solirubrobacterales;Solirubrobacteraceae;Solirubrobacteraceae;	1	2	0	1	0	0
Otu1040	9	Bacteria;Firmicutes;Clostridia;Oscillospirales;Oscillospiraceae;UCG-005;	1	2	2	2	0	0
Otu1041	21	Bacteria;Actinobacteriota;Actinobacteria;Euzebyales;Euzebyaceae;Euzebya;	1	2	7	2	1	5
Otu1042	9	Archaea;Nanoarchaeota;Nanoarchaeia;Woesearchaeales;Woesearchaeales_unclassified;Woesearchaeales_unclassified;	1	0	2	2	0	0
Otu1043	9	Bacteria;Bacteroidota;Bacteroidia;Flavobacteriales;Crocinitomicaceae;Crocinitomicaceae_unclassified;	0	0	2	0	0	0
Otu1044	10	Bacteria;Armatimonadota;Fimbriimonadia;Fimbriimonadales;Fimbriimonadaceae;Fimbriimonadaceae_unclassified;	1	1	0	3	1	1
Otu1045	12	Bacteria;Firmicutes;Desulfitobacteriia;Desulfitobacteriales;Desulfitobacteriaceae;Desulfosporosinus;	4	4	1	0	0	0
Otu1046	25	Bacteria;Actinobacteriota;Actinobacteria;Kineosporiales;Kineosporiaceae;Kineosporia;	0	22	0	0	0	0
Otu1047	15	Bacteria;Firmicutes;Incertae_Sedis;DTU014;DTU014_fa;DTU014;	0	0	3	3	1	5
Otu1048	9	Bacteria;Firmicutes;Negativicutes;Veillonellales-Selenomonadales;Sporomusaceae;uncultured;	1	0	0	3	2	0
Otu1049	55	Bacteria;Actinobacteriota;Actinobacteria;Micrococcales;Demequinaceae;Demequina;	6	16	6	4	3	9
Otu1050	9	Bacteria;Entotheonellaeota;Entotheonellia;Entotheonellales;Entotheonellaceae;Entotheonellaceae;	0	0	1	4	1	0
Otu1051	9	Bacteria;Actinobacteriota;Rubrobacteria;Rubrobacterales;Rubrobacteriaceae;Rubrobacter;	2	2	1	0	1	2
Otu1052	14	Bacteria;Actinobacteriota;Thermoleophilia;uncultured;uncultured_fa;uncultured;	0	1	2	2	0	2
Otu1053	10	Bacteria;Firmicutes;Desulfotomaculia;Desulfotomaculales;Desulfotomaculales_fa;Desulfotomaculum;	3	1	1	1	3	0
Otu1054	11	Bacteria;Proteobacteria;Gammaproteobacteria;Burkholderiales;Comamonadaceae;Pelomonas;	0	0	3	2	3	0
Otu1055	9	Bacteria;Actinobacteriota;Actinobacteria;Corynebacteriales;Nocardiaceae;Nocardiaceae;	0	1	0	1	0	0
Otu1056	10	Bacteria;Proteobacteria;Gammaproteobacteria;Burkholderiales;Alcaligenaceae;Alcaligenaceae;	0	1	1	0	1	1
Otu1057	11	Bacteria;Acidobacteriota;Subgroup_22;Subgroup_22_or;Subgroup_22_fa;Subgroup_22;	1	0	1	3	3	0
Otu1058	15	Bacteria;Proteobacteria;Gammaproteobacteria;Salinisphaerales;Solimonadaceae;uncultured;	0	2	1	0	11	0
Otu1059	29	Bacteria;Proteobacteria;Gammaproteobacteria;Burkholderiales;Comamonadaceae;Variovorax;	6	3	0	1	14	1
Otu1060	11	Bacteria;Chloroflexi;Dehalococcoidia;SAR202_clade;SAR202_clade_fa;SAR202_clade;	1	0	1	1	1	0
Otu1061	11	Bacteria;Firmicutes;Bacilli;Erysipelotrichales;Erysipelotrichales_unclassified;Erysipelotrichales_unclassified;	1	2	3	1	0	0
Otu1062	11	Bacteria;Cyanobacteria;Vampirivibrionia;Vampirovibrionales;Vampirovibrionaceae;Vampirovibrionaceae;	3	0	1	3	0	1
Otu1063	30	Bacteria;Proteobacteria;Alphaproteobacteria;Rhodospirillales;Magnetospirillaceae;Magnetospirillaceae;	2	2	13	0	3	2
Otu1064	8	Bacteria;Myxococcota;Myxococcia;Myxococcales;Myxococcaceae;Myxococcaceae;	2	1	0	0	0	0
Otu1065	31	Bacteria;Firmicutes;Bacilli;Thermoactinomycetales;Thermoactinomycetaceae;Seinonella;	5	0	6	3	1	0
Otu1066	9	Bacteria;Verrucomicrobiota;Verrucomicrobiae;Pedosphaerales;Pedosphaeraceae;Ellin517;	5	0	0	0	1	0
Otu1067	22	Bacteria;Desulfobacterota;Desulfobacteria;Desulfobacterales;Desulfosarcinaceae;Desulfosarcinaceae_unclassified;	2	1	12	1	2	0
Otu1068	31	Bacteria;Proteobacteria;Alphaproteobacteria;Rhizobiales;Beijerinckiaceae;Camelimonas;	1	1	3	7	5	2
Otu1069	8	Bacteria;Actinobacteriota;Actinobacteria;Kineosporiales;Kineosporiaceae;Kineosporiaceae;	0	1	2	4	0	0
Otu1070	10	Bacteria;Actinobacteriota;Coriobacteriia;Coriobacteriales;Eggerthellaceae;Eggerthellaceae_unclassified;	0	1	7	1	0	0
Otu1071	10	Bacteria;Firmicutes;Negativicutes;uncultured;uncultured_fa;uncultured;	1	1	1	2	1	0
Otu1072	9	Bacteria;Proteobacteria;Gammaproteobacteria;Burkholderiales;Hydrogenophilaceae;uncultured;	0	1	1	2	1	0
Otu1073	18	Bacteria;Proteobacteria;Alphaproteobacteria;Sphingomonadales;Sphingomonadaceae;Qipengyuania;	2	4	3	4	1	3
Otu1074	21	Bacteria;Spirochaetota;Leptospirae;Leptospirales;Leptospiraceae;Leptospira;	0	4	0	0	12	1
Otu1075	13	Bacteria;Proteobacteria;Alphaproteobacteria;AT-s3-44;AT-s3-44_fa;AT-s3-44;	0	1	1	0	5	1
Otu1076	8	Bacteria;Cyanobacteria;Vampirivibrionia;Obscuribacterales;Obscuribacteraceae;Obscuribacteraceae_unclassified;	1	0	1	2	1	1
Otu1077	13	Bacteria;Proteobacteria;Alphaproteobacteria;Rhizobiales;Stappiaceae;Stappiaceae_unclassified;	1	1	1	2	0	4
Otu1078	18	Bacteria;Planctomycetota;Planctomycetes;Pirellulales;Pirellulaceae;Candidatus_Anammoximicrobium;	0	0	9	2	0	0
Otu1079	8	Bacteria;Proteobacteria;Alphaproteobacteria;Rhizobiales;Rhizobiales_fa;Rhizobiales;	1	0	1	2	0	1
Otu1080	25	Bacteria;Proteobacteria;Gammaproteobacteria;Cellvibrionales;Porticoccaceae;Porticoccaceae_unclassified;	0	2	3	1	13	0
Otu1081	17	Bacteria;Actinobacteriota;Actinobacteria;Streptosporangiales;Streptosporangiaceae;Streptosporangium;	1	1	1	1	0	1
Otu1082	8	Bacteria;Proteobacteria;Alphaproteobacteria;Tistrellales;Geminicoccaceae;Geminicoccaceae_unclassified;	0	2	2	0	0	0
Otu1083	10	Bacteria;Proteobacteria;Alphaproteobacteria;Acetobacterales;Acetobacteraceae;Craurococcus-Caldovatus;	1	2	0	3	0	3
Otu1084	28	Bacteria;Proteobacteria;Gammaproteobacteria;Cellvibrionales;Cellvibrionaceae;Cellvibrionaceae_unclassified;	1	2	7	8	9	0
Otu1085	9	Bacteria;Acidobacteriota;Acidobacteriae;Acidobacteriales;Acidobacteriaceae_(Subgroup_1);Terriglobus;	2	1	0	3	1	1
Otu1086	17	Bacteria;Firmicutes;Clostridia;Oscillospirales;Ruminococcaceae;Faecalibacterium;	2	4	0	4	0	1
Otu1087	8	Bacteria;Patescibacteria;Parcubacteria;Candidatus_Staskawiczbacteria;Candidatus_Staskawiczbacteria_fa;Candidatus_Staskawiczbacteria;	0	0	2	0	0	0
Otu1088	9	Bacteria;Actinobacteriota;Actinobacteria;Micromonosporales;Micromonosporaceae;Plantactinospora;	2	0	1	1	0	2
Otu1089	13	Bacteria;Proteobacteria;Alphaproteobacteria;Azospirillales;Azospirillaceae;Azospirillum;	4	1	3	0	2	1
Otu1090	18	Bacteria;Firmicutes;Clostridia;Clostridiales;Clostridiaceae;Clostridium_sensu_stricto_6;	2	1	1	2	2	2
Otu1091	52	Bacteria;Actinobacteriota;Actinobacteria;Micrococcales;Microbacteriaceae;Galbitalea;	5	20	9	4	1	1
Otu1092	11	Bacteria;Firmicutes;Clostridia;Oscillospirales;Oscillospiraceae;Sporobacter;	0	0	1	2	3	2
Otu1093	13	Bacteria;Proteobacteria;Gammaproteobacteria;Cellvibrionales;Porticoccaceae;C1-B045;	0	0	4	1	5	1
Otu1094	8	Bacteria;Proteobacteria;Alphaproteobacteria;Sphingomonadales;Sphingomonadaceae;Plot4-2H12;	0	0	0	2	0	0
Otu1095	11	Bacteria;Firmicutes;Bacilli;Staphylococcales;Staphylococcaceae;Staphylococcus;	0	2	2	2	3	0
Otu1096	22	Bacteria;Proteobacteria;Gammaproteobacteria;KF-JG30-C25;KF-JG30-C25_fa;KF-JG30-C25;	1	1	1	2	3	3
Otu1097	8	Bacteria;Actinobacteriota;Actinobacteria;Micrococcales;Micrococcaceae;Micrococcaceae;	1	1	0	1	0	1
Otu1098	10	Bacteria;Firmicutes;Clostridia;Lachnospirales;Lachnospiraceae;Acetitomaculum;	0	1	7	0	0	0
Otu1099	12	Bacteria;Bacteroidota;Bacteroidia;Cytophagales;MWH-CFBk5;MWH-CFBk5;	1	0	4	0	0	0
Otu1100	16	Bacteria;Proteobacteria;Alphaproteobacteria;Caulobacterales;Hyphomonadaceae;Hyphomonadaceae_unclassified;	1	0	6	0	2	0
Otu1101	17	Bacteria;Proteobacteria;Alphaproteobacteria;Rhodobacterales;Rhodobacteraceae;Defluviimonas;	0	2	8	0	1	2
Otu1102	32	Bacteria;Bacteroidota;Bacteroidia;Cytophagales;Spirosomaceae;Spirosoma;	0	25	1	3	0	0
Otu1103	13	Bacteria;Proteobacteria;Alphaproteobacteria;Rhizobiales;Kaistiaceae;Kaistia;	0	1	0	5	1	2
Otu1104	23	Bacteria;Proteobacteria;Gammaproteobacteria;Legionellales;Legionellaceae;Legionellaceae_unclassified;	0	2	1	9	2	4
Otu1105	8	Bacteria;Verrucomicrobiota;Verrucomicrobiae;Verrucomicrobiales;Verrucomicrobiales_unclassified;Verrucomicrobiales_unclassified;	0	2	0	0	1	2
Otu1106	30	Bacteria;Proteobacteria;Gammaproteobacteria;Enterobacterales;Enterobacteriaceae;Escherichia-Shigella;	6	0	1	0	9	2
Otu1107	10	Bacteria;Actinobacteriota;Actinobacteria;Micromonosporales;Micromonosporaceae;Catellatospora;	1	0	1	1	1	1
Otu1108	9	Bacteria;Firmicutes;Negativicutes;Veillonellales-Selenomonadales;Sporomusaceae;Sporomusa;	1	3	1	1	0	0
Otu1109	25	Bacteria;Cyanobacteria;Vampirivibrionia;Vampirovibrionales;Vampirovibrionaceae;Vampirovibrionaceae_unclassified;	1	18	1	0	0	1
Otu1110	8	Bacteria;Actinobacteriota;Actinobacteria;Frankiales;Geodermatophilaceae;Geodermatophilaceae;	1	2	0	0	0	0
Otu1111	10	Bacteria;Proteobacteria;Alphaproteobacteria;Paracaedibacterales;Paracaedibacteraceae;Paracaedibacteraceae_unclassified;	0	3	1	2	0	1
Otu1112	11	Bacteria;Nitrospirota;Thermodesulfovibrionia;uncultured;uncultured_fa;uncultured;	0	0	0	3	5	0
Otu1113	23	Bacteria;Myxococcota;Polyangia;Nannocystales;Nannocystaceae;uncultured;	5	4	1	4	1	0
Otu1114	13	Bacteria;Proteobacteria;Gammaproteobacteria;Burkholderiales;Comamonadaceae;Leptothrix;	2	0	4	2	1	3
Otu1115	10	Bacteria;Planctomycetota;Planctomycetes;Isosphaerales;Isosphaeraceae;Isosphaera;	0	0	0	2	1	1
Otu1116	10	Bacteria;Actinobacteriota;Actinobacteria;Kineosporiales;Kineosporiaceae;Angustibacter;	0	1	0	0	1	0
Otu1117	9	Bacteria;Proteobacteria;Alphaproteobacteria;Rhizobiales;Methyloligellaceae;Methyloligellaceae;	0	0	0	0	2	0
Otu1118	39	Bacteria;Proteobacteria;Gammaproteobacteria;Gammaproteobacteria_or;Gammaproteobacteria_fa;Gammaproteobacteria;	8	10	0	3	4	7
Otu1119	9	Bacteria;Actinobacteriota;Actinobacteria;Corynebacteriales;Corynebacteriaceae;Corynebacterium;	1	2	3	1	1	0
Otu1120	11	Bacteria;Bacteroidota;Bacteroidia;Cytophagales;Amoebophilaceae;Candidatus_Amoebophilus;	1	1	2	0	0	0
Otu1121	24	Bacteria;Actinobacteriota;Actinobacteria;Micromonosporales;Micromonosporaceae;uncultured;	12	3	0	3	0	0
Otu1122	16	Bacteria;Proteobacteria;Gammaproteobacteria;Enterobacterales;Yersiniaceae;Serratia;	3	0	1	0	1	0
Otu1123	8	Bacteria;Actinobacteriota;Actinobacteria;Micrococcales;Intrasporangiaceae;uncultured;	0	0	1	0	1	0
Otu1124	9	Bacteria;Actinobacteriota;Actinobacteria;Propionibacteriales;Propionibacteriaceae;Microlunatus;	1	3	2	0	1	0
Otu1125	32	Bacteria;Firmicutes;Clostridia;Clostridia_or;Hungateiclostridiaceae;Hungateiclostridium;	6	2	6	1	8	1
Otu1126	50	Bacteria;Bacteroidota;Bacteroidia;Cytophagales;Spirosomaceae;Taeseokella;	0	1	0	2	41	1
Otu1127	18	Bacteria;Proteobacteria;Gammaproteobacteria;Methylococcales;Methylococcaceae;Methyloterricola;	0	0	7	2	0	4
Otu1128	9	Bacteria;Deinococcota;Deinococci;Deinococcales;Deinococcaceae;Deinococcus;	3	1	0	1	1	1
Otu1129	18	Bacteria;Actinobacteriota;Actinobacteria;Streptosporangiales;Streptosporangiaceae;Microbispora;	2	0	4	3	0	2
Otu1130	61	Bacteria;Cyanobacteria;Cyanobacteriia;Cyanobacteriales;uncultured;uncultured;	21	8	3	11	3	1
Otu1131	84	Bacteria;Actinobacteriota;Actinobacteria;Micrococcales;Micrococcaceae;Citricoccus;	10	21	7	7	2	9
Otu1132	20	Bacteria;Bacteroidota;Kryptonia;Kryptoniales;MSB-3C8;MSB-3C8;	0	0	8	0	0	0
Otu1133	7	Bacteria;Firmicutes;Bacilli;Bacillales;Planococcaceae;Domibacillus;	3	0	0	1	0	0
Otu1134	7	Bacteria;Proteobacteria;Gammaproteobacteria;Pseudomonadales;Moraxellaceae;Moraxellaceae_unclassified;	0	0	2	1	1	0
Otu1135	9	Bacteria;Gemmatimonadota;Gemmatimonadota_unclassified;Gemmatimonadota_unclassified;Gemmatimonadota_unclassified;Gemmatimonadota_unclassified;	1	0	0	0	1	2
Otu1136	8	Bacteria;Firmicutes;Clostridia;Clostridia_or;Hungateiclostridiaceae;Pseudobacteroides;	1	1	0	0	0	0
Otu1137	14	Bacteria;Desulfobacterota;Desulfobulbia;Desulfobulbales;Desulfobulbaceae;Desulfobulbus;	0	0	5	3	1	0
Otu1138	19	Bacteria;Bacteroidota;Rhodothermia;Rhodothermales;Rhodothermaceae;Rhodothermaceae;	7	3	0	1	3	0
Otu1139	7	Bacteria;Actinobacteriota;Coriobacteriia;Coriobacteriales;Atopobiaceae;Olsenella;	0	0	4	1	0	0
Otu1140	13	Bacteria;Latescibacterota;Latescibacteria;Latescibacterales;Latescibacteraceae;Latescibacteraceae;	1	0	1	1	7	1
Otu1141	13	Bacteria;Proteobacteria;Gammaproteobacteria;Xanthomonadales;Xanthomonadaceae;uncultured;	0	1	2	2	0	2
Otu1142	7	Bacteria;Proteobacteria;Gammaproteobacteria;Pseudomonadales;Pseudomonadaceae;Azomonas;	0	0	0	0	0	0
Otu1143	22	Bacteria;Proteobacteria;Gammaproteobacteria;Burkholderiales;Comamonadaceae;Piscinibacter;	0	3	6	3	2	1
Otu1144	9	Bacteria;Planctomycetota;Phycisphaerae;Tepidisphaerales;Tepidisphaeraceae;Tepidisphaeraceae_unclassified;	0	0	1	1	0	0
Otu1145	8	Archaea;Euryarchaeota;Methanobacteria;Methanobacteriales;Methanobacteriaceae;Methanosphaera;	1	1	0	0	0	0
Otu1146	7	Archaea;Archaea_unclassified;Archaea_unclassified;Archaea_unclassified;Archaea_unclassified;Archaea_unclassified;	0	0	1	2	0	0
Otu1147	8	Bacteria;Bacteroidota;Bacteroidia;Chitinophagales;Saprospiraceae;Membranicola;	0	0	2	1	0	0
Otu1148	8	Bacteria;Firmicutes;Clostridia;Monoglobales;Monoglobaceae;Monoglobus;	0	2	2	1	1	0
Otu1149	7	Bacteria;Proteobacteria;Gammaproteobacteria;Xanthomonadales;Rhodanobacteraceae;Rudaea;	1	2	0	0	3	1
Otu1150	9	Bacteria;Actinobacteriota;Coriobacteriia;Coriobacteriales;Atopobiaceae;Atopobium;	1	2	4	0	1	0
Otu1151	13	Bacteria;Firmicutes;Desulfitobacteriia;Desulfitobacteriales;Heliobacteriaceae;uncultured;	2	0	0	2	7	0
Otu1152	10	Bacteria;Firmicutes;Bacilli;Haloplasmatales;Haloplasmataceae;Haloplasma;	1	2	0	0	5	1
Otu1153	17	Bacteria;Proteobacteria;Gammaproteobacteria;Granulosicoccales;uncultured;uncultured;	3	0	1	0	1	0
Otu1154	11	Bacteria;Firmicutes;Clostridia;Lachnospirales;Lachnospiraceae;Anaerocolumna;	2	2	3	0	2	0
Otu1155	26	Bacteria;Proteobacteria;Alphaproteobacteria;Parvibaculales;Parvibaculaceae;Rhodoligotrophos;	2	0	2	4	3	6
Otu1156	17	Bacteria;Proteobacteria;Gammaproteobacteria;Burkholderiales;Oxalobacteraceae;Oxalicibacterium;	0	2	4	0	0	1
Otu1157	27	Bacteria;Actinobacteriota;Actinobacteria;Frankiales;Sporichthyaceae;Sporichthyaceae_unclassified;	0	15	4	0	2	5
Otu1158	8	Bacteria;Cyanobacteria;Cyanobacteria_unclassified;Cyanobacteria_unclassified;Cyanobacteria_unclassified;Cyanobacteria_unclassified;	0	2	1	1	0	1
Otu1159	19	Bacteria;Bacteroidota;Bacteroidia;Sphingobacteriales;Sphingobacteriaceae;uncultured;	4	1	2	4	1	0
Otu1160	9	Bacteria;Firmicutes;Dethiobacteria;Dethiobacterales;Dethiobacteraceae;Dethiobacter;	3	2	2	0	0	0
Otu1161	10	Bacteria;Firmicutes;Clostridia;Lachnospirales;Lachnospiraceae;Agathobacter;	3	1	0	0	2	1
Otu1162	30	Bacteria;Proteobacteria;Alphaproteobacteria;Rhizobiales;Rhizobiaceae;Ensifer;	0	2	1	0	2	0
Otu1163	11	Bacteria;Firmicutes;Clostridia;Oscillospirales;Ruminococcaceae;Candidatus_Soleaferrea;	0	2	3	0	0	0
Otu1164	14	Bacteria;Proteobacteria;Gammaproteobacteria;Burkholderiales;Methylophilaceae;MM2;	1	0	2	1	2	0
Otu1165	7	Bacteria;Actinobacteriota;Acidimicrobiia;Microtrichales;Microtrichaceae;Microtrichaceae_unclassified;	1	1	0	0	0	3
Otu1166	8	Bacteria;Verrucomicrobiota;Chlamydiae;Chlamydiales;Chlamydiaceae;Chlamydiaceae;	1	2	1	1	2	0
Otu1167	18	Bacteria;Bacteroidota;Bacteroidia;Bacteroidales;Prolixibacteraceae;Roseimarinus;	0	0	4	0	3	0
Otu1168	13	Bacteria;Verrucomicrobiota;Verrucomicrobiae;Opitutales;Puniceicoccaceae;Cerasicoccus;	0	5	2	1	0	0
Otu1169	8	Bacteria;Cloacimonadota;Cloacimonadia;Cloacimonadales;Cloacimonadales_unclassified;Cloacimonadales_unclassified;	0	0	0	4	0	0
Otu1170	18	Bacteria;Synergistota;Synergistia;Synergistales;Synergistaceae;Syner-01;	0	0	9	0	5	0
Otu1171	9	Bacteria;Bacteroidota;Bacteroidia;Bacteroidales;Dysgonomonadaceae;uncultured;	0	0	3	1	1	0
Otu1172	10	Bacteria;Spirochaetota;Leptospirae;Leptospirales;Leptospiraceae;Turneriella;	0	1	2	0	7	0
Otu1173	7	Bacteria;Proteobacteria;Alphaproteobacteria;Micropepsales;Micropepsaceae;Rhizomicrobium;	0	0	0	5	0	0
Otu1174	11	Archaea;Crenarchaeota;Nitrososphaeria;Nitrosotaleales;Nitrosotaleaceae;Nitrosotaleaceae;	0	1	0	2	0	1
Otu1175	10	Bacteria;Cyanobacteria;Cyanobacteriia;Cyanobacteriales;Nostocaceae;Nostoc_PCC-7524;	2	0	0	0	0	0
Otu1176	7	Bacteria;Firmicutes;Bacilli;Bacillales;Planococcaceae;Caryophanon;	0	2	0	2	0	0
Otu1177	24	Bacteria;Actinobacteriota;Actinobacteria;Micromonosporales;Micromonosporaceae;Krasilnikovia;	1	3	1	14	0	2
Otu1178	10	Bacteria;Bacteroidota;Bacteroidia;Cytophagales;Hymenobacteraceae;Hymenobacteraceae_unclassified;	5	2	0	1	0	0
Otu1179	23	Bacteria;Firmicutes;Bacilli;Bacillales;Planococcaceae;Planomicrobium;	8	11	1	0	0	0
Otu1180	17	Bacteria;Chloroflexi;Anaerolineae;Anaerolineales;Anaerolineaceae;Longilinea;	0	0	7	3	0	0
Otu1181	7	Bacteria;Firmicutes;Negativicutes;Veillonellales-Selenomonadales;Sporomusaceae;Sporomusaceae_unclassified;	1	0	0	3	2	0
Otu1182	12	Bacteria;Actinobacteriota;Actinobacteria;Micrococcales;Microbacteriaceae;Curtobacterium;	0	3	1	0	4	0
Otu1183	8	Bacteria;Bacteroidota;Bacteroidia;Bacteroidales;Prolixibacteraceae;Meniscus;	0	1	3	2	0	0
Otu1184	12	Bacteria;Firmicutes;Desulfotomaculia;Desulfotomaculales;Desulfotomaculales_fa;Desulfotomaculales_fa_unclassified;	1	1	2	0	4	0
Otu1185	10	Bacteria;Planctomycetota;Planctomycetes;Pirellulales;Pirellulaceae;p-1088-a5_gut_group;	0	1	2	2	2	0
Otu1186	6	Bacteria;Verrucomicrobiota;Verrucomicrobiota_unclassified;Verrucomicrobiota_unclassified;Verrucomicrobiota_unclassified;Verrucomicrobiota_unclassified;	0	0	1	2	0	0
Otu1187	7	Bacteria;Caldatribacteriota;JS1;JS1_or;JS1_fa;JS1;	0	0	4	0	0	0
Otu1188	6	Bacteria;Proteobacteria;Alphaproteobacteria;Acetobacterales;Acetobacterales_unclassified;Acetobacterales_unclassified;	0	0	1	2	0	1
Otu1189	6	Bacteria;Firmicutes;Negativicutes;Veillonellales-Selenomonadales;Veillonellales-Selenomonadales_unclassified;Veillonellales-Selenomonadales_unclassified;	0	0	1	3	0	0
Otu1190	17	Bacteria;Proteobacteria;Gammaproteobacteria;Salinisphaerales;Solimonadaceae;Fontimonas;	0	0	4	0	0	0
Otu1191	36	Bacteria;Bacteroidota;Bacteroidia;Bacteroidales;Dysgonomonadaceae;Petrimonas;	0	0	13	3	8	0
Otu1192	6	Bacteria;Bacteroidota;Bacteroidia;Bacteroidales;Rikenellaceae;Rikenellaceae_RC9_gut_group;	0	1	0	0	1	0
Otu1193	7	Bacteria;Patescibacteria;ABY1;Candidatus_Uhrbacteria;Candidatus_Uhrbacteria_fa;Candidatus_Uhrbacteria;	0	0	2	2	0	1
Otu1194	16	Bacteria;Proteobacteria;Gammaproteobacteria;Burkholderiales;Alcaligenaceae;Castellaniella;	1	0	4	0	0	2
Otu1195	6	Bacteria;Bacteroidota;Bacteroidia;Flavobacteriales;Weeksellaceae;Empedobacter;	0	0	0	3	3	0
Otu1196	7	Bacteria;Firmicutes;Bacilli;Staphylococcales;Staphylococcaceae;Salinicoccus;	0	1	5	0	0	0
Otu1197	9	Bacteria;Acidobacteriota;Holophagae;Holophagales;Holophagaceae;Holophagaceae_unclassified;	0	0	1	0	8	0
Otu1198	6	Bacteria;Myxococcota;Polyangia;Polyangiales;Polyangiaceae;Jahnella;	0	1	0	2	0	0
Otu1199	7	Bacteria;Bacteroidota;Bacteroidia;Cytophagales;Cytophagaceae;Cytophagaceae_unclassified;	0	1	1	2	1	0
Otu1200	11	Bacteria;Proteobacteria;Alphaproteobacteria;Rhodospirillales;Magnetospirillaceae;Magnetospirillaceae_unclassified;	0	3	1	1	3	0
Otu1201	23	Archaea;Crenarchaeota;Nitrososphaeria;Nitrososphaerales;Nitrososphaeraceae;Nitrososphaeraceae_unclassified;	1	2	1	1	1	3
Otu1202	7	Bacteria;Proteobacteria;Gammaproteobacteria;Oceanospirillales;Halomonadaceae;Halomonas;	2	0	1	2	0	0
Otu1203	34	Bacteria;Proteobacteria;Gammaproteobacteria;Xanthomonadales;Rhodanobacteraceae;Ahniella;	1	1	18	5	0	1
Otu1204	6	Bacteria;Bacteroidota;Bacteroidia;Bacteroidetes_VC2.1_Bac22;Bacteroidetes_VC2.1_Bac22_fa;Bacteroidetes_VC2.1_Bac22;	0	0	1	1	0	0
Otu1205	6	Bacteria;Firmicutes;Clostridia;Oscillospirales;Oscillospiraceae;UCG-007;	1	0	1	1	0	0
Otu1206	6	Bacteria;Proteobacteria;Alphaproteobacteria;Caedibacterales;Caedibacteraceae;Candidatus_Nucleicultrix;	0	1	1	0	3	0
Otu1207	9	Bacteria;Verrucomicrobiota;Verrucomicrobiae;Opitutales;Opitutaceae;IMCC26134;	0	0	0	2	0	0
Otu1208	9	Bacteria;Planctomycetota;Planctomycetes;Planctomycetales;Rubinisphaeraceae;Rubinisphaera;	0	2	0	1	1	1
Otu1209	7	Bacteria;Patescibacteria;Gracilibacteria;Candidatus_Peregrinibacteria;Candidatus_Peregrinibacteria_fa;Candidatus_Peregrinibacteria;	0	1	0	0	3	0
Otu1210	38	Bacteria;Proteobacteria;Gammaproteobacteria;Diplorickettsiales;Diplorickettsiaceae;Rickettsiella;	9	1	21	5	1	0
Otu1211	6	Bacteria;Planctomycetota;Planctomycetes;Gemmatales;Gemmataceae;Zavarzinella;	1	0	0	1	0	0
Otu1212	6	Bacteria;Cyanobacteria;Vampirivibrionia;Vampirovibrionales;Vampirovibrionales_unclassified;Vampirovibrionales_unclassified;	0	1	2	0	1	1
Otu1213	6	Bacteria;Proteobacteria;Gammaproteobacteria;Xanthomonadales;Xanthomonadaceae;Vulcaniibacterium;	0	1	1	1	0	0
Otu1214	6	Bacteria;Firmicutes;Clostridia;Lachnospirales;Defluviitaleaceae;Defluviitalea;	1	0	0	0	0	1
Otu1215	9	Bacteria;Firmicutes;Negativicutes;Veillonellales-Selenomonadales;Veillonellaceae;Dialister;	2	0	0	0	0	0
Otu1216	16	Bacteria;Actinobacteriota;Actinobacteria;Propionibacteriales;Propionibacteriaceae;Phytoactinopolyspora;	0	0	0	0	1	0
Otu1217	9	Bacteria;Proteobacteria;Alphaproteobacteria;Ferrovibrionales;Ferrovibrionales_fa;Ferrovibrionales_fa_unclassified;	1	2	2	0	1	0
Otu1218	8	Bacteria;Proteobacteria;Gammaproteobacteria;Burkholderiales;Nitrosomonadaceae;Nitrosospira;	2	1	1	0	0	1
Otu1219	10	Bacteria;Patescibacteria;Parcubacteria;Candidatus_Azambacteria;Candidatus_Azambacteria_fa;Candidatus_Azambacteria;	0	0	6	1	1	0
Otu1220	14	Bacteria;Bacteroidota;Bacteroidia;Flavobacteriales;Weeksellaceae;Elizabethkingia;	4	0	1	3	0	1
Otu1221	6	Bacteria;Chloroflexi;Dehalococcoidia;Sh765B-TzT-20;Sh765B-TzT-20_fa;Sh765B-TzT-20;	1	1	0	3	1	0
Otu1222	7	Bacteria;Firmicutes;Clostridia;Lachnospirales;Lachnospiraceae;Blautia;	1	0	0	0	1	0
Otu1223	7	Bacteria;Actinobacteriota;Actinobacteria;Micromonosporales;Micromonosporaceae;Micromonosporaceae;	1	0	0	0	0	1
Otu1224	6	Bacteria;Proteobacteria;Alphaproteobacteria;Rhizobiales;Rhizobiaceae;Paramesorhizobium;	0	0	3	1	0	0
Otu1225	12	Bacteria;Proteobacteria;Alphaproteobacteria;Thalassobaculales;Thalassobaculaceae;Thalassobaculum;	1	2	1	0	1	0
Otu1226	8	Bacteria;Proteobacteria;Alphaproteobacteria;Zavarziniales;uncultured;uncultured;	1	0	0	0	0	1
Otu1227	32	Bacteria;Firmicutes;Bacilli;Bacillales;Planococcaceae;Chryseomicrobium;	11	15	0	0	0	0
Otu1228	9	Bacteria;Bacteroidota;Bacteroidia;Bacteroidales;Bacteroidetes_BD2-2;Bacteroidetes_BD2-2;	2	0	1	0	0	0
Otu1229	28	Bacteria;Actinobacteriota;Actinobacteria;Streptosporangiales;Nocardiopsaceae;Thermobifida;	4	6	1	0	0	1
Otu1230	26	Bacteria;Actinobacteriota;Coriobacteriia;Coriobacteriales;Coriobacteriales_Incertae_Sedis;uncultured;	4	2	9	3	1	0
Otu1231	6	Bacteria;Firmicutes;Negativicutes;Veillonellales-Selenomonadales;Sporomusaceae;Anaerosporomusa;	0	2	1	0	1	0
Otu1232	6	Archaea;Euryarchaeota;Methanobacteria;Methanobacteriales;Methanobacteriaceae;Methanobacteriaceae_unclassified;	0	0	1	2	0	0
Otu1233	7	Bacteria;Firmicutes;Clostridia;Clostridia_or;Hungateiclostridiaceae;Fastidiosipila;	0	0	1	0	2	2
Otu1234	13	Bacteria;Caldatribacteriota;Caldatribacteriia;Caldatribacteriales;Caldatribacteriaceae;Candidatus_Caldatribacterium;	0	0	2	3	0	0
Otu1235	22	Bacteria;Chloroflexi;Anaerolineae;Anaerolineales;Anaerolineaceae;Levilinea;	0	0	3	9	3	0
Otu1236	6	Bacteria;Planctomycetota;Planctomycetes;Pirellulales;Pirellulaceae;Bythopirellula;	1	3	0	1	0	0
Otu1237	6	Bacteria;Chloroflexi;Dehalococcoidia;GIF3;GIF3_fa;GIF3;	0	0	2	2	0	0
Otu1238	15	Bacteria;Proteobacteria;Alphaproteobacteria;Sphingomonadales;Sphingomonadaceae;DSSF69;	0	2	0	2	4	4
Otu1239	27	Bacteria;Cloacimonadota;Cloacimonadia;Cloacimonadales;Cloacimonadaceae;Candidatus_Cloacimonas;	0	0	24	0	0	0
Otu1240	6	Bacteria;Planctomycetota;Planctomycetes;Planctomycetales;Planctomycetales_fa;Planctomycetales;	2	0	0	0	1	0
Otu1241	9	Bacteria;Bacteroidota;Bacteroidia;Cytophagales;Spirosomaceae;Emticicia;	0	0	2	1	4	0
Otu1242	42	Bacteria;Firmicutes;Clostridia;Peptostreptococcales-Tissierellales;Anaerovoracaceae;uncultured;	0	2	15	3	3	0
Otu1243	23	Bacteria;Spirochaetota;Leptospirae;Leptospirales;Leptospiraceae;Leptonema;	0	1	3	1	11	0
Otu1244	7	Bacteria;Myxococcota;Polyangia;Polyangiales;Polyangiaceae;Aetherobacter;	0	1	0	1	4	0
Otu1245	21	Bacteria;Bacteroidota;Bacteroidia;Flavobacteriales;Cryomorphaceae;Vicingus;	0	0	14	0	0	0
Otu1246	6	Bacteria;Desulfobacterota;Syntrophobacteria;Syntrophobacterales;Syntrophobacteraceae;Desulfovirga;	1	1	0	0	0	1
Otu1247	10	Bacteria;Actinobacteriota;Actinobacteria;Frankiales;Sporichthyaceae;uncultured;	0	3	2	2	1	1
Otu1248	30	Bacteria;Cyanobacteria;Cyanobacteriia;Cyanobacteriales;Nostocaceae;uncultured;	4	0	0	17	1	2
Otu1249	5	Bacteria;Gemmatimonadota;Longimicrobia;Longimicrobiales;Longimicrobiaceae;YC-ZSS-LKJ147;	1	1	0	0	2	0
Otu1250	5	Bacteria;Acidobacteriota;Subgroup_25;Subgroup_25_or;Subgroup_25_fa;Subgroup_25;	0	3	0	1	0	0
Otu1251	11	Bacteria;Proteobacteria;Gammaproteobacteria;Burkholderiales;Rhodocyclaceae;uncultured;	0	0	4	2	0	0
Otu1252	8	Bacteria;Proteobacteria;Alphaproteobacteria;Rhizobiales;Beijerinckiaceae;Beijerinckia;	1	1	0	0	0	1
Otu1253	9	Bacteria;Proteobacteria;Gammaproteobacteria;Xanthomonadales;Rhodanobacteraceae;uncultured;	1	0	2	0	0	0
Otu1254	5	Bacteria;Armatimonadota;Armatimonadia;Armatimonadales;Armatimonadales_unclassified;Armatimonadales_unclassified;	0	3	0	0	0	2
Otu1255	5	Bacteria;Firmicutes;Clostridia;Peptostreptococcales-Tissierellales;Thermotaleaceae;Thermotaleaceae_unclassified;	0	0	2	0	0	2
Otu1256	10	Bacteria;Proteobacteria;Gammaproteobacteria;Methylococcales;Methylococcaceae;Methylococcus;	0	0	1	1	0	0
Otu1257	13	Bacteria;Actinobacteriota;Coriobacteriia;Coriobacteriales;uncultured;uncultured;	0	1	2	0	1	0
Otu1258	5	Bacteria;Firmicutes;Bacilli;Bacillales;Bacillaceae;Ureibacillus;	0	1	1	0	0	0
Otu1259	23	Bacteria;Bacteroidota;Bacteroidia;Chitinophagales;Chitinophagaceae;Cnuella;	6	10	1	2	0	0
Otu1260	6	Bacteria;Bacteroidota;Bacteroidia;Chitinophagales;Saprospiraceae;Phaeodactylibacter;	1	1	0	2	0	0
Otu1261	6	Bacteria;Proteobacteria;Gammaproteobacteria;Burkholderiales;Oxalobacteraceae;uncultured;	2	0	1	0	1	0
Otu1262	6	Bacteria;Proteobacteria;Alphaproteobacteria;Sphingomonadales;Sphingomonadaceae;Sphingoaurantiacus;	0	0	3	2	0	1
Otu1263	10	Bacteria;Myxococcota;Myxococcia;Myxococcales;27F-1492R;27F-1492R;	2	0	4	3	0	0
Otu1264	5	Bacteria;Chloroflexi;Anaerolineae;Anaerolineales;Anaerolineaceae;Ornatilinea;	0	0	0	1	0	0
Otu1265	8	Bacteria;Proteobacteria;Alphaproteobacteria;Rhizobiales;Beijerinckiaceae;Methylocella;	0	3	1	1	1	1
Otu1266	5	Bacteria;Proteobacteria;Alphaproteobacteria;Azospirillales;Azospirillaceae;Azospirillaceae_unclassified;	0	0	0	0	1	2
Otu1267	6	Bacteria;Verrucomicrobiota;Verrucomicrobiae;Pedosphaerales;Pedosphaeraceae;SH3-11;	0	0	2	0	2	0
Otu1268	18	Bacteria;Actinobacteriota;Actinobacteria;Micrococcales;Promicromonosporaceae;Isoptericola;	5	4	1	2	1	1
Otu1269	5	Bacteria;Proteobacteria;Alphaproteobacteria;Rhizobiales;Rhizobiaceae;Mycoplana;	0	0	0	0	0	0
Otu1270	8	Bacteria;Desulfobacterota;Desulfobulbia;Desulfobulbales;Desulfocapsaceae;Desulfofustis;	0	0	8	0	0	0
Otu1271	14	Bacteria;Proteobacteria;Gammaproteobacteria;Oceanospirillales;Pseudohongiellaceae;Pseudohongiella;	2	1	1	3	2	1
Otu1272	11	Bacteria;Firmicutes;Bacilli;Thermoactinomycetales;Thermoactinomycetaceae;Risungbinella;	1	1	4	0	0	0
Otu1273	7	Bacteria;Proteobacteria;Gammaproteobacteria;B108;B108_fa;B108;	0	0	1	0	1	1
Otu1274	19	Bacteria;Actinobacteriota;Actinobacteria;Streptosporangiales;Thermomonosporaceae;Thermostaphylospora;	2	0	1	0	4	2
Otu1275	21	Bacteria;Proteobacteria;Alphaproteobacteria;Thalassobaculales;Oceanibaculaceae;Oceanibaculum;	2	0	2	0	16	1
Otu1276	7	Bacteria;Bdellovibrionota;Bdellovibrionia;Bacteriovoracales;Bacteriovoracaceae;uncultured;	0	1	0	2	0	0
Otu1277	5	Bacteria;Patescibacteria;Parcubacteria;GWA2-38-13b;GWA2-38-13b_fa;GWA2-38-13b;	0	0	0	1	0	0
Otu1278	6	Bacteria;Desulfobacterota;Desulfuromonadia;Geobacterales;Geobacteraceae;uncultured;	0	0	3	0	0	0
Otu1279	7	Bacteria;Planctomycetota;Phycisphaerae;MSBL9;SM23-30;SM23-30;	0	0	3	3	1	0
Otu1280	6	Bacteria;Patescibacteria;Gracilibacteria;Absconditabacteriales_(SR1);Absconditabacteriales_(SR1)_fa;Absconditabacteriales_(SR1);	1	0	1	3	0	0
Otu1281	5	Bacteria;Proteobacteria;Alphaproteobacteria;Rhodobacterales;Rhodobacteraceae;Rubellimicrobium;	0	1	1	0	0	0
Otu1282	18	Bacteria;Actinobacteriota;Actinobacteria;Micromonosporales;Micromonosporaceae;Salinispora;	0	2	3	0	1	0
Otu1283	5	Bacteria;Firmicutes;Clostridia;Peptostreptococcales-Tissierellales;Peptostreptococcales-Tissierellales_fa;Soehngenia;	0	0	3	0	0	0
Otu1284	15	Bacteria;Bacteroidota;Bacteroidia;Bacteroidales;Prevotellaceae;Alloprevotella;	6	0	1	0	0	0
Otu1285	5	Bacteria;Proteobacteria;Alphaproteobacteria;Rhodospirillales;Rhodospirillales_unclassified;Rhodospirillales_unclassified;	0	0	2	1	1	0
Otu1286	5	Bacteria;Desulfobacterota;Desulfuromonadia;Geobacterales;Geobacteraceae;Citrifermentans;	0	0	0	1	1	0
Otu1287	10	Bacteria;Proteobacteria;Gammaproteobacteria;Burkholderiales;Alcaligenaceae;Advenella;	1	2	3	1	0	0
Otu1288	29	Archaea;Halobacterota;Methanomicrobia;Methanomicrobiales;Methanoregulaceae;Methanolinea;	0	0	0	14	0	0
Otu1289	7	Bacteria;Proteobacteria;Gammaproteobacteria;JTB23;JTB23_fa;JTB23;	0	1	3	1	2	0
Otu1290	5	Bacteria;Firmicutes;Bacilli;Lactobacillales;Lactobacillales_unclassified;Lactobacillales_unclassified;	1	1	0	0	1	0
Otu1291	5	Bacteria;Verrucomicrobiota;Verrucomicrobiae;Verrucomicrobiales;Verrucomicrobiaceae;Verrucomicrobium;	0	0	1	0	0	0
Otu1292	10	Bacteria;Bacteroidota;Bacteroidia;Chitinophagales;Saprospiraceae;OLB8;	0	1	3	3	0	0
Otu1293	5	Bacteria;Actinobacteriota;Actinobacteria;Micrococcales;Dermabacteraceae;Brachybacterium;	1	0	1	1	0	0
Otu1294	10	Bacteria;Proteobacteria;Gammaproteobacteria;Burkholderiales;Chromobacteriaceae;Chromobacteriaceae_unclassified;	1	0	0	0	5	1
Otu1295	5	Bacteria;Bdellovibrionota;Oligoflexia;Oligoflexia_unclassified;Oligoflexia_unclassified;Oligoflexia_unclassified;	0	1	2	1	0	1
Otu1296	7	Bacteria;Firmicutes;Bacilli;Thermoactinomycetales;Thermoactinomycetaceae;uncultured;	1	0	1	1	0	0
Otu1297	5	Bacteria;Proteobacteria;Gammaproteobacteria;Burkholderiales;Alcaligenaceae;Verticiella;	1	1	0	0	0	0
Otu1298	6	Bacteria;Chloroflexi;Ktedonobacteria;B10-SB3A;B10-SB3A_fa;B10-SB3A;	1	1	0	1	0	0
Otu1299	5	Bacteria;Cyanobacteria;Cyanobacteriia;Cyanobacteriales;Coleofasciculaceae;Microcoleus_PCC-7113;	0	0	0	2	0	0
Otu1300	9	Bacteria;Desulfobacterota;Desulfuromonadia;Geobacterales;Geobacteraceae;Geobacter;	1	0	1	0	0	0
Otu1301	5	Bacteria;Proteobacteria;Gammaproteobacteria;Methylococcales;Methylomonadaceae;uncultured;	0	0	0	4	0	0
Otu1302	7	Bacteria;Proteobacteria;Gammaproteobacteria;Burkholderiales;Comamonadaceae;Pseudorhodoferax;	2	2	1	0	0	0
Otu1303	5	Bacteria;Cloacimonadota;Cloacimonadia;Cloacimonadales;Cloacimonadaceae;Cloacimonadaceae_unclassified;	0	0	3	1	0	0
Otu1304	37	Bacteria;Proteobacteria;Gammaproteobacteria;Enterobacterales;Enterobacteriaceae;Enterobacter;	3	10	2	1	1	0
Otu1305	9	Bacteria;Firmicutes;Clostridia;Peptostreptococcales-Tissierellales;Peptostreptococcaceae;Sporacetigenium;	0	0	1	0	1	3
Otu1306	8	Bacteria;Cyanobacteria;Cyanobacteriia;Cyanobacteriales;Coleofasciculaceae;Microcoleus_SAG_1449-1a;	3	0	1	3	0	1
Otu1307	5	Bacteria;Firmicutes;Clostridia;Lachnospirales;Lachnospiraceae;Lachnospira;	0	0	0	0	0	0
Otu1308	5	Bacteria;Firmicutes;Bacilli;Bacillales;Bacillaceae;Paucisalibacillus;	3	0	1	0	0	0
Otu1309	7	Bacteria;Proteobacteria;Alphaproteobacteria;Sphingomonadales;Sphingomonadaceae;Sandaracinobacter;	0	0	2	3	2	0
Otu1310	5	Bacteria;Bacteroidota;Bacteroidia;Bacteroidales;Prevotellaceae;Prevotellaceae_unclassified;	1	1	1	0	0	0
Otu1311	5	Bacteria;Desulfobacterota;Desulfovibrionia;Desulfovibrionales;Desulfovibrionaceae;Desulfovibrionaceae_unclassified;	0	0	1	0	1	0
Otu1312	7	Bacteria;Bacteroidota;Ignavibacteria;Ignavibacteriales;SR-FBR-L83;SR-FBR-L83;	0	0	1	2	0	0
Otu1313	7	Bacteria;Chloroflexi;Dehalococcoidia;661239;661239_fa;661239;	2	1	3	0	0	1
Otu1314	5	Bacteria;Proteobacteria;Gammaproteobacteria;Burkholderiales;uncultured;uncultured;	2	0	0	1	1	0
Otu1315	5	Bacteria;Chloroflexi;N9D0;N9D0_or;N9D0_fa;N9D0;	0	0	1	0	1	0
Otu1316	5	Bacteria;Firmicutes;Clostridia;Clostridiales;Clostridiaceae;Clostridium_sensu_stricto_10;	0	0	1	3	0	0
Otu1317	5	Bacteria;Chloroflexi;Anaerolineae;Anaerolineales;Anaerolineaceae;Anaerolineaceae_UCG-001;	0	0	0	3	0	0
Otu1318	4	Bacteria;Actinobacteriota;Actinobacteria;FFCH16263;FFCH16263_fa;FFCH16263;	0	0	0	2	0	0
Otu1319	8	Bacteria;Proteobacteria;Gammaproteobacteria;Pseudomonadales;Moraxellaceae;Perlucidibaca;	0	0	1	0	6	0
Otu1320	6	Bacteria;Firmicutes;Bacilli;Lactobacillales;Listeriaceae;Listeria;	0	0	0	0	0	0
Otu1321	4	Bacteria;Actinobacteriota;Coriobacteriia;Coriobacteriales;Coriobacteriales_unclassified;Coriobacteriales_unclassified;	0	0	2	0	1	1
Otu1322	4	Bacteria;Proteobacteria;Gammaproteobacteria;Burkholderiales;Rhodocyclaceae;Georgfuchsia;	0	0	0	1	0	0
Otu1323	4	Bacteria;Proteobacteria;Alphaproteobacteria;Rhizobiales;Rhizobiaceae;Ciceribacter;	0	0	2	0	0	0
Otu1324	4	Bacteria;Proteobacteria;Gammaproteobacteria;Xanthomonadales;Xanthomonadaceae;SN8;	0	0	1	1	0	0
Otu1325	6	Bacteria;Proteobacteria;Gammaproteobacteria;Steroidobacterales;Woeseiaceae;JTB255_marine_benthic_group;	0	0	2	2	0	0
Otu1326	4	Bacteria;Verrucomicrobiota;Verrucomicrobiae;Pedosphaerales;Pedosphaeraceae;ADurb.Bin118;	0	0	0	2	0	0
Otu1327	11	Bacteria;Synergistota;Synergistia;Synergistales;Synergistaceae;Aminivibrio;	0	1	9	0	0	0
Otu1328	4	Bacteria;Actinobacteriota;Actinobacteria;Frankiales;Nakamurellaceae;Nakamurella;	1	0	0	2	0	1
Otu1329	4	Bacteria;Proteobacteria;Alphaproteobacteria;Azospirillales;Azospirillaceae;Skermanella;	0	1	0	1	1	0
Otu1330	8	Bacteria;Proteobacteria;Gammaproteobacteria;Burkholderiales;Methylophilaceae;Methylobacillus;	1	1	1	1	2	0
Otu1331	14	Bacteria;Firmicutes;Bacilli;Lactobacillales;Enterococcaceae;Enterococcus;	0	12	1	0	1	0
Otu1332	13	Bacteria;Firmicutes;Clostridia;Clostridiales;Clostridiaceae;Clostridium_sensu_stricto_11;	2	1	0	1	0	0
Otu1333	11	Bacteria;Acidobacteriota;Holophagae;Holophagales;Holophagaceae;Geothrix;	0	2	1	1	7	0
Otu1334	4	Bacteria;Patescibacteria;ABY1;Candidatus_Buchananbacteria;Candidatus_Buchananbacteria_fa;Candidatus_Buchananbacteria;	0	0	4	0	0	0
Otu1335	4	Bacteria;Proteobacteria;Gammaproteobacteria;Burkholderiales;Methylophilaceae;Methylophilus;	0	1	0	0	1	1
Otu1336	4	Bacteria;Actinobacteriota;Actinobacteria;Streptosporangiales;Streptosporangiaceae;Sphaerimonospora;	0	0	2	0	0	1
Otu1337	25	Bacteria;Campilobacterota;Campylobacteria;Campylobacterales;Sulfurovaceae;Sulfurovum;	4	1	2	3	5	1
Otu1338	4	Bacteria;Myxococcota;Polyangia;Polyangiales;Polyangiaceae;Labilithrix;	0	0	2	1	0	0
Otu1339	4	Bacteria;Dependentiae;Babeliae;Babeliales;UBA12411;UBA12411;	0	1	0	1	0	0
Otu1340	4	Bacteria;Firmicutes;Clostridia;Clostridia_or;Hungateiclostridiaceae;Anaerobacterium;	1	0	2	0	0	0
Otu1341	5	Bacteria;Verrucomicrobiota;Lentisphaeria;Oligosphaerales;Lenti-02;Lenti-02;	0	0	2	0	0	0
Otu1342	5	Bacteria;Desulfobacterota;Desulfuromonadia;Bradymonadales;Bradymonadales_fa;Bradymonadales;	0	1	1	0	0	1
Otu1343	4	Bacteria;Desulfobacterota;Desulfuromonadia;Desulfuromonadia_or;Desulfuromonadaceae;Desulfuromonadaceae;	0	0	1	0	1	0
Otu1344	14	Bacteria;Actinobacteriota;Actinobacteria;Propionibacteriales;Nocardioidaceae;uncultured;	0	0	0	0	6	1
Otu1345	4	Bacteria;Firmicutes;Clostridia;uncultured;uncultured_fa;uncultured;	0	0	2	0	0	0
Otu1346	47	Bacteria;Actinobacteriota;Actinobacteria;Micromonosporales;Micromonosporaceae;Asanoa;	3	2	4	2	6	16
Otu1347	4	Bacteria;Synergistota;Synergistia;Synergistales;Synergistaceae;JGI-0000079-D21;	0	0	0	2	0	0
Otu1348	18	Bacteria;Desulfobacterota;Desulfobacteria;Desulfobacterales;Desulfosarcinaceae;uncultured;	0	0	11	1	0	0
Otu1349	4	Bacteria;Acidobacteriota;Acidobacteriae;Subgroup_12;Subgroup_12_fa;Subgroup_12;	0	0	0	0	0	1
Otu1350	4	Bacteria;Thermotogota;Thermotogae;Kosmotogales;Kosmotogaceae;Mesotoga;	0	0	0	1	0	0
Otu1351	4	Bacteria;Proteobacteria;Gammaproteobacteria;Ectothiorhodospirales;Thioalkalispiraceae;Thioalkalispira-Sulfurivermis;	0	0	1	1	0	1
Otu1352	4	Bacteria;Firmicutes;Clostridia;Lachnospirales;Lachnospiraceae;uncultured;	0	1	1	0	1	0
Otu1353	14	Bacteria;Proteobacteria;Alphaproteobacteria;Acetobacterales;Acetobacteraceae;Siccirubricoccus;	2	0	0	0	0	2
Otu1354	4	Bacteria;Firmicutes;Clostridia;Peptostreptococcales-Tissierellales;Proteiniboraceae;Proteiniborus;	1	0	0	1	0	0
Otu1355	4	Bacteria;Firmicutes;Clostridia;Peptococcales;Peptococcaceae;Dehalobacterium;	1	0	1	0	0	0
Otu1356	4	Bacteria;Bacteroidota;Bacteroidia;Cytophagales;Cytophagaceae;Rhodocytophaga;	0	1	0	1	0	0
Otu1357	4	Bacteria;Proteobacteria;Gammaproteobacteria;Salinisphaerales;Solimonadaceae;Nevskia;	0	1	1	0	1	0
Otu1358	4	Bacteria;Bacteroidota;Bacteroidia;Flavobacteriales;Flavobacteriaceae;Hoppeia;	0	0	2	0	0	0
Otu1359	4	Bacteria;Desulfobacterota;Desulfuromonadia;Desulfuromonadia_unclassified;Desulfuromonadia_unclassified;Desulfuromonadia_unclassified;	0	0	0	0	1	0
Otu1360	4	Bacteria;Actinobacteriota;Coriobacteriia;Coriobacteriia_unclassified;Coriobacteriia_unclassified;Coriobacteriia_unclassified;	0	0	0	2	0	0
Otu1361	6	Bacteria;Actinobacteriota;Actinobacteria;Propionibacteriales;Nocardioidaceae;Mumia;	1	1	1	0	0	1
Otu1362	17	Bacteria;Proteobacteria;Gammaproteobacteria;Beggiatoales;Beggiatoaceae;uncultured;	1	0	2	0	0	1
Otu1363	4	Bacteria;Firmicutes;Clostridia;Proteinivoracales;uncultured;uncultured;	1	1	0	0	0	2
Otu1364	5	Bacteria;Firmicutes;Clostridia;Oscillospirales;Ruminococcaceae;Ruminococcaceae;	0	0	0	0	1	0
Otu1365	8	Bacteria;Proteobacteria;Gammaproteobacteria;Salinisphaerales;Solimonadaceae;Solimonas;	1	0	0	0	1	0
Otu1366	5	Bacteria;Firmicutes;Clostridia;Peptostreptococcales-Tissierellales;Peptostreptococcales-Tissierellales_fa;Tepidimicrobium;	1	0	0	1	2	0
Otu1367	9	Bacteria;Firmicutes;Bacilli;Bacillales;Planococcaceae;Bhargavaea;	1	0	3	1	0	0
Otu1368	7	Bacteria;Firmicutes;Clostridia;Lachnospirales;Lachnospiraceae;Lachnoclostridium;	1	1	1	0	0	0
Otu1369	5	Bacteria;Proteobacteria;Gammaproteobacteria;Burkholderiales;Comamonadaceae;Mitsuaria;	1	1	0	0	0	0
Otu1370	4	Bacteria;Proteobacteria;Gammaproteobacteria;Enterobacterales;Enterobacteriaceae;Kosakonia;	3	0	0	0	0	0
Otu1371	9	Bacteria;Proteobacteria;Gammaproteobacteria;Cellvibrionales;Microbulbiferaceae;Microbulbifer;	2	2	1	0	0	0
Otu1372	4	Bacteria;Firmicutes;Clostridia;Peptostreptococcales-Tissierellales;Thermotaleaceae;Salimesophilobacter;	0	0	3	0	0	0
Otu1373	5	Bacteria;Proteobacteria;Alphaproteobacteria;Rhizobiales;Rhizobiaceae;uncultured;	0	1	1	1	1	0
Otu1374	4	Bacteria;Firmicutes;BRH-c20a;BRH-c20a_or;BRH-c20a_fa;BRH-c20a;	0	0	1	2	0	0
Otu1375	18	Bacteria;Proteobacteria;Gammaproteobacteria;Burkholderiales;Burkholderiaceae;uncultured;	2	1	0	1	0	1
Otu1376	33	Bacteria;Proteobacteria;Gammaproteobacteria;Burkholderiales;Comamonadaceae;Delftia;	1	3	1	2	23	0
Otu1377	4	Bacteria;Bacteroidota;Bacteroidia;Cytophagales;Cytophagaceae;Cytophaga;	0	0	0	2	1	0
Otu1378	5	Bacteria;Proteobacteria;Alphaproteobacteria;Rickettsiales;Rickettsiaceae;Rickettsia;	0	0	1	2	0	0
Otu1379	4	Bacteria;Verrucomicrobiota;Verrucomicrobiae;Opitutales;Opitutales_unclassified;Opitutales_unclassified;	0	0	0	2	0	0
Otu1380	11	Bacteria;Bacteroidota;Rhodothermia;Rhodothermales;Rhodothermaceae;Rubrivirga;	0	0	0	8	1	0
Otu1381	6	Bacteria;Bacteroidota;Bacteroidia;Flavobacteriales;Flavobacteriaceae;Myroides;	0	0	0	4	0	0
Otu1382	5	Bacteria;Proteobacteria;Alphaproteobacteria;Rhizobiales;Beijerinckiaceae;Rhodoblastus;	1	0	1	0	1	1
Otu1383	4	Bacteria;Elusimicrobiota;Lineage_IIc;Lineage_IIc_or;Lineage_IIc_fa;Lineage_IIc;	0	1	1	1	0	0
Otu1384	4	Bacteria;Proteobacteria;Gammaproteobacteria;Methylococcales;Methylococcaceae;Methylomagnum;	0	0	0	1	1	0
Otu1385	5	Bacteria;Proteobacteria;Alphaproteobacteria;Parvibaculales;Parvibaculaceae;uncultured;	0	0	0	3	0	0
Otu1386	19	Bacteria;Bacteroidota;Bacteroidia;Bacteroidales;Tannerellaceae;Macellibacteroides;	0	0	6	2	0	0
Otu1387	6	Bacteria;Firmicutes;Clostridia;Clostridiales;Clostridiaceae;Clostridium_sensu_stricto_5;	0	2	0	1	0	1
Otu1388	4	Bacteria;Firmicutes;Clostridia;Lachnospirales;Lachnospiraceae;Coprococcus;	3	0	0	0	0	0
Otu1389	5	Bacteria;Firmicutes;Desulfotomaculia;Desulfotomaculales;Desulfotomaculales_fa;Desulfofarcimen;	3	0	0	0	1	0
Otu1390	6	Bacteria;Proteobacteria;Gammaproteobacteria;Burkholderiales;Comamonadaceae;Xylophilus;	0	1	1	1	2	0
Otu1391	6	Bacteria;Desulfobacterota;Desulfobacteria;Desulfobacterales;Desulfococcaceae;Desulfococcus;	1	0	3	0	0	0
Otu1392	5	Bacteria;Verrucomicrobiota;Omnitrophia;Omnitrophales;Omnitrophales_unclassified;Omnitrophales_unclassified;	0	1	2	2	0	0
Otu1393	4	Bacteria;Bacteroidota;Bacteroidia;Chitinophagales;Chitinophagaceae;Niveitalea;	0	0	0	0	0	0
Otu1394	17	Bacteria;Chloroflexi;Dehalococcoidia;GIF9;AB-539-J10;AB-539-J10;	1	0	3	0	0	0
Otu1395	4	Bacteria;Chloroflexi;Ktedonobacteria;Ktedonobacteria_or;Ktedonobacteria_fa;Ktedonobacteria;	0	0	0	0	0	0
Otu1396	5	Bacteria;Firmicutes;Clostridia;Peptostreptococcales-Tissierellales;Peptostreptococcales-Tissierellales_fa;Peptostreptococcales-Tissierellales_fa_unclassified;	1	0	0	1	0	1
Otu1397	5	Bacteria;Proteobacteria;Gammaproteobacteria;Oceanospirillales;Alcanivoracaceae1;Alcanivorax;	0	0	1	0	2	1
Otu1398	34	Bacteria;Proteobacteria;Alphaproteobacteria;Rhizobiales;Rhizobiaceae;Hoeflea;	0	8	0	3	6	3
Otu1399	4	Bacteria;Firmicutes;Bacilli;Bacillales;Bacillaceae;Falsibacillus;	1	0	0	0	0	0
Otu1400	4	Bacteria;Proteobacteria;Alphaproteobacteria;Rhizobiales;Rhizobiaceae;Corticibacterium;	1	0	0	0	0	0
Otu1401	5	Bacteria;Firmicutes;Clostridia;Lachnospirales;Lachnospiraceae;Lachnospiraceae_NK4A136_group;	1	0	0	0	2	0
Otu1402	4	Bacteria;Bacteroidota;Bacteroidia;Bacteroidales;3M1PL1-52_termite_group;3M1PL1-52_termite_group;	0	0	1	0	1	0
Otu1403	4	Bacteria;Firmicutes;Bacilli;Bacillales;Bacillaceae;Thalassobacillus;	1	0	1	0	1	1
Otu1404	4	Bacteria;Proteobacteria;Gammaproteobacteria;Steroidobacterales;Steroidobacteraceae;Povalibacter;	0	0	0	1	0	1
Otu1405	4	Bacteria;Proteobacteria;Alphaproteobacteria;Sphingomonadales;Sphingomonadaceae;Stakelama;	0	0	1	1	0	0
Otu1406	18	Bacteria;Bacteroidota;Bacteroidia;Flavobacteriales;Weeksellaceae;uncultured;	2	0	4	0	1	0
Otu1407	5	Archaea;Halobacterota;Methanomicrobia;Methanomicrobiales;Methanomicrobiaceae;uncultured;	0	0	1	2	1	0
Otu1408	6	Bacteria;Proteobacteria;Alphaproteobacteria;Ferrovibrionales;Ferrovibrionales_unclassified;Ferrovibrionales_unclassified;	0	1	2	0	0	0
Otu1409	6	Bacteria;Myxococcota;Myxococcia;Myxococcales;Myxococcaceae;Aggregicoccus;	2	0	0	1	0	0
Otu1410	5	Bacteria;Cyanobacteria;Cyanobacteriia;Cyanobacteriales;Nostocaceae;Calothrix_PCC-6303;	0	0	1	0	0	3
Otu1411	9	Bacteria;Cyanobacteria;Cyanobacteriia;Cyanobacteriales;Nostocaceae;Desmonostoc_PCC-7422;	0	0	2	0	0	5
Otu1412	6	Bacteria;Proteobacteria;Gammaproteobacteria;Nitrosococcales;Nitrosococcaceae;Nitrosococcaceae_unclassified;	0	0	1	0	0	0
Otu1413	4	Bacteria;Firmicutes;Bacilli;Erysipelotrichales;Erysipelotrichaceae;Erysipelotrichaceae_unclassified;	0	1	1	0	2	0
Otu1414	4	Bacteria;Actinobacteriota;Actinobacteria;Bifidobacteriales;Bifidobacteriaceae;Bifidobacteriaceae_unclassified;	0	1	1	0	0	0
Otu1415	24	Bacteria;Chloroflexi;Anaerolineae;Anaerolineales;Anaerolineaceae;Flexilinea;	0	0	6	4	2	0
Otu1416	4	Bacteria;Actinobacteriota;Actinobacteria;Nitriliruptorales;Nitriliruptoraceae;Egicoccus;	1	0	0	0	1	0
Otu1417	3	Bacteria;Proteobacteria;Alphaproteobacteria;Rhizobiales;Xanthobacteraceae;Variibacter;	0	0	0	0	0	0
Otu1418	5	Bacteria;Campilobacterota;Campylobacteria;Campylobacterales;Sulfurimonadaceae;Sulfuricurvum;	0	1	1	0	1	0
Otu1419	3	Bacteria;Firmicutes;Bacilli;Bacillales;Bacillaceae;Gracilibacillus;	1	0	0	0	0	0
Otu1420	4	Bacteria;Proteobacteria;Alphaproteobacteria;Rickettsiales;SM1B06;SM1B06;	0	1	0	0	3	0
Otu1421	3	Bacteria;Proteobacteria;Gammaproteobacteria;Nitrosococcales;Methylophagaceae;Methylophaga;	0	1	2	0	0	0
Otu1422	4	Bacteria;Firmicutes;Clostridia;Peptostreptococcales-Tissierellales;Thermotaleaceae;Anaerosolibacter;	0	1	2	1	0	0
Otu1423	3	Bacteria;Bacteroidota;Bacteroidia;Chitinophagales;Chitinophagaceae;Asinibacterium;	0	0	0	0	1	0
Otu1424	4	Bacteria;Proteobacteria;Alphaproteobacteria;Puniceispirillales;EF100-94H03;EF100-94H03;	1	0	1	0	0	0
Otu1425	4	Bacteria;Firmicutes;Bacilli;Bacillales;Bacillaceae;Sinibacillus;	1	0	0	1	0	0
Otu1426	3	Bacteria;Firmicutes;Bacilli;Alicyclobacillales;Alicyclobacillaceae;Alicyclobacillus;	1	0	0	0	0	0
Otu1427	3	Bacteria;Chloroflexi;Anaerolineae;Anaerolineales;Anaerolineaceae;ADurb.Bin120;	0	0	1	0	0	0
Otu1428	3	Bacteria;Proteobacteria;Gammaproteobacteria;Burkholderiales;Rhodocyclaceae;Dechlorobacter;	0	0	1	1	0	0
Otu1429	14	Bacteria;Actinobacteriota;Actinobacteria;Micrococcales;Intrasporangiaceae;Tetrasphaera;	1	1	3	3	0	2
Otu1430	3	Archaea;Halobacterota;Methanocellia;Methanocellales;Methanocellaceae;Methanocellaceae_unclassified;	0	0	0	0	0	0
Otu1431	3	Bacteria;Proteobacteria;Alphaproteobacteria;Rhodobacterales;Rhodobacteraceae;Tabrizicola;	0	0	1	0	0	1
Otu1432	3	Bacteria;Bacteroidota;Bacteroidia;Bacteroidales;Prolixibacteraceae;Prolixibacteraceae;	0	0	0	2	0	0
Otu1433	3	Bacteria;Firmicutes;Bacilli;Erysipelotrichales;Erysipelotrichaceae;Solobacterium;	0	0	2	0	0	0
Otu1434	3	Bacteria;Proteobacteria;Gammaproteobacteria;Methylococcales;Methylomonadaceae;IheB2-23;	0	1	0	1	0	0
Otu1435	3	Bacteria;Actinobacteriota;Actinobacteria;Streptosporangiales;Thermomonosporaceae;Thermomonosporaceae;	0	1	0	0	0	0
Otu1436	3	Archaea;Halobacterota;Methanosarcinia;Methanosarciniales;Methanosarciniales_unclassified;Methanosarciniales_unclassified;	0	0	0	3	0	0
Otu1437	5	Bacteria;Acidobacteriota;Acidobacteriae;GOUTB8;GOUTB8_fa;GOUTB8;	1	0	3	0	0	0
Otu1438	3	Bacteria;Firmicutes;Bacilli;Bacillales;Bacillaceae;Salirhabdus;	1	0	0	0	1	0
Otu1439	3	Bacteria;Actinobacteriota;Actinobacteria;Micrococcales;Micrococcaceae;Renibacterium;	0	0	0	0	0	0
Otu1440	3	Bacteria;Bacteroidota;Bacteroidia;Bacteroidales;Bacteroidales_UCG-001;Bacteroidales_UCG-001;	0	0	1	0	0	0
Otu1441	4	Bacteria;Spirochaetota;Spirochaetia;Spirochaetales;Spirochaetaceae;GWE2-31-10;	0	0	0	0	0	0
Otu1442	10	Bacteria;Firmicutes;Bacilli;Bacillales;Planococcaceae;Planococcus;	2	3	0	0	1	0
Otu1443	3	Bacteria;Actinobacteriota;Actinobacteria;Corynebacteriales;Nocardiaceae;Williamsia;	0	0	0	0	1	1
Otu1444	3	Bacteria;Proteobacteria;Gammaproteobacteria;Burkholderiales;Gallionellaceae;Sideroxydans;	0	0	1	1	0	0
Otu1445	3	Bacteria;Cyanobacteria;Cyanobacteriia;Cyanobacteriales;Nostocaceae;Fischerella_CENA298;	1	0	0	1	0	1
Otu1446	6	Bacteria;Actinobacteriota;Actinobacteria;Catenulisporales;Actinospicaceae;Actinospica;	1	0	0	0	1	1
Otu1447	4	Bacteria;Proteobacteria;Gammaproteobacteria;Burkholderiales;Alcaligenaceae;Parapusillimonas;	0	0	0	1	1	0
Otu1448	3	Bacteria;Actinobacteriota;Actinobacteria;Micromonosporales;Micromonosporaceae;Hamadaea;	0	1	1	0	0	0
Otu1449	3	Bacteria;Actinobacteriota;Actinobacteria;Micromonosporales;Micromonosporaceae;Pseudosporangium;	0	0	0	2	0	0
Otu1450	3	Bacteria;Cyanobacteria;Cyanobacteriia;Cyanobacteriales;Coleofasciculaceae;uncultured;	1	0	0	2	0	0
Otu1451	3	Bacteria;Proteobacteria;Gammaproteobacteria;JG36-TzT-191;JG36-TzT-191_fa;JG36-TzT-191;	0	1	0	1	0	0
Otu1452	10	Bacteria;Proteobacteria;Alphaproteobacteria;Acetobacterales;Acetobacteraceae;Belnapia;	0	1	0	5	3	0
Otu1453	3	Bacteria;Proteobacteria;Alphaproteobacteria;Rhizobiales;Rhizobiaceae;Aliihoeflea;	0	0	2	1	0	0
Otu1454	10	Bacteria;Bacteroidota;Bacteroidia;Bacteroidales;PeH15;PeH15;	0	0	1	0	0	0
Otu1455	3	Bacteria;Actinobacteriota;Thermoleophilia;Solirubrobacterales;Solirubrobacteraceae;Patulibacter;	0	1	0	0	0	0
Otu1456	3	Bacteria;Proteobacteria;Gammaproteobacteria;Oceanospirillales;Halomonadaceae;Halomonadaceae_unclassified;	0	1	0	0	0	0
Otu1457	5	Bacteria;Proteobacteria;Alphaproteobacteria;Ferrovibrionales;Ferrovibrionales_fa;Marinibaculum;	0	1	2	0	0	0
Otu1458	3	Bacteria;Proteobacteria;Gammaproteobacteria;Alteromonadales;Shewanellaceae;Shewanella;	0	0	1	0	0	0
Otu1459	3	Bacteria;Firmicutes;Clostridia;Lachnospirales;Lachnospiraceae;Roseburia;	0	0	0	0	1	0
Otu1460	3	Bacteria;Firmicutes;Clostridia;Lachnospirales;Lachnospiraceae;Anaerostignum;	0	0	0	1	2	0
Otu1461	8	Bacteria;Verrucomicrobiota;Verrucomicrobiae;Pedosphaerales;Pedosphaeraceae;DEV114;	0	0	3	0	0	0
Otu1462	3	Bacteria;Planctomycetota;Planctomycetes;Pirellulales;Pirellulaceae;Pirellulaceae;	1	0	0	0	0	0
Otu1463	3	Bacteria;Firmicutes;Clostridia;Peptostreptococcales-Tissierellales;Peptostreptococcaceae;Intestinibacter;	0	1	1	0	1	0
Otu1464	6	Bacteria;Campilobacterota;Campylobacteria;Campylobacterales;Arcobacteraceae;Arcobacter;	0	1	0	4	0	0
Otu1465	3	Bacteria;Bacteroidota;Bacteroidia;Flavobacteriales;Weeksellaceae;Apibacter;	0	0	0	0	0	0
Otu1466	4	Bacteria;Chloroflexi;Dehalococcoidia;FS117-23B-02;FS117-23B-02_fa;FS117-23B-02;	0	0	2	0	0	0
Otu1467	5	Bacteria;Firmicutes;Negativicutes;Veillonellales-Selenomonadales;Sporomusaceae;Pelosinus;	0	0	0	1	3	0
Otu1468	3	Bacteria;Proteobacteria;Gammaproteobacteria;Pseudomonadales;Pseudomonadales_unclassified;Pseudomonadales_unclassified;	0	0	0	0	0	0
Otu1469	3	Bacteria;Myxococcota;Polyangia;PS-B29;PS-B29_fa;PS-B29;	0	0	1	0	0	0
Otu1470	3	Bacteria;Actinobacteriota;Actinobacteria;Corynebacteriales;Tsukamurellaceae;Tsukamurella;	0	0	0	1	0	0
Otu1471	3	Bacteria;Firmicutes;Desulfitobacteriia;Desulfitobacteriales;Syntrophobotulaceae;Dehalobacter;	0	1	1	0	0	0
Otu1472	3	Bacteria;Firmicutes;Clostridia;Oscillospirales;Oscillospirales_fa;Hydrogenoanaerobacterium;	1	1	1	0	0	0
Otu1473	3	Bacteria;Firmicutes;Clostridia;Clostridiales;Clostridiaceae;Clostridium_sensu_stricto_7;	0	0	0	2	0	0
Otu1474	3	Bacteria;Firmicutes;Bacilli;Bacillales;Bacillaceae;Halobacillus;	1	0	0	0	0	0
Otu1475	7	Bacteria;Myxococcota;Polyangia;MidBa8;MidBa8_fa;MidBa8;	0	0	0	0	5	0
Otu1476	3	Bacteria;uncultured;uncultured_cl;uncultured_or;uncultured_fa;uncultured;	0	0	1	1	0	0
Otu1477	3	Bacteria;Firmicutes;Clostridia;Oscillospirales;Oscillospiraceae;Colidextribacter;	0	0	2	0	1	0
Otu1478	3	Bacteria;Firmicutes;Clostridia;Oscillospirales;Oscillospiraceae;UCG-002;	2	0	0	0	0	0
Otu1479	4	Bacteria;Cyanobacteria;Cyanobacteriia;Oxyphotobacteria_Incertae_Sedis;Unknown_Family;Leptolyngbya_ANT.L52.2;	0	0	0	2	0	0
Otu1480	4	Bacteria;Cyanobacteria;Cyanobacteriia;Cyanobacteriales;Chroococcidiopsaceae;Aliterella;	0	1	0	0	0	0
Otu1481	9	Bacteria;Bacteroidota;Bacteroidia;Cytophagales;Cyclobacteriaceae;Fontibacter;	0	0	5	0	1	0
Otu1482	3	Bacteria;Myxococcota;Myxococcia;Myxococcales;Myxococcaceae;Hyalangium;	0	0	0	1	0	0
Otu1483	9	Bacteria;Actinobacteriota;Actinobacteria;Pseudonocardiales;Pseudonocardiaceae;Pseudonocardiaceae;	0	0	3	0	0	3
Otu1484	4	Bacteria;Cyanobacteria;Cyanobacteriia;Leptolyngbyales;Leptolyngbyaceae;Leptolyngbya_PCC-6306;	0	0	0	2	0	0
Otu1485	3	Bacteria;Actinobacteriota;Actinobacteria;Micrococcales;Microbacteriaceae;Amnibacterium;	0	0	0	0	1	1
Otu1486	4	Bacteria;Bacteroidota;Bacteroidia;Bacteroidales;Marinilabiliaceae;uncultured;	0	0	0	0	1	0
Otu1487	3	Bacteria;Bacteroidota;Bacteroidia;Cytophagales;Cyclobacteriaceae;Cyclobacteriaceae;	0	0	0	1	0	0
Otu1488	3	Bacteria;Verrucomicrobiota;Verrucomicrobiae;Chthoniobacterales;01D2Z36;01D2Z36;	0	1	0	1	0	0
Otu1489	7	Bacteria;Proteobacteria;Alphaproteobacteria;Rhizobiales;Xanthobacteraceae;Afipia;	0	1	1	3	0	1
Otu1490	9	Bacteria;Actinobacteriota;Actinobacteria;Pseudonocardiales;Pseudonocardiaceae;Thermocrispum;	0	3	1	0	2	0
Otu1491	3	Bacteria;Acidobacteriota;Blastocatellia;Blastocatellia_unclassified;Blastocatellia_unclassified;Blastocatellia_unclassified;	0	0	0	1	0	0
Otu1492	4	Bacteria;Proteobacteria;Gammaproteobacteria;Burkholderiales;Gallionellaceae;Candidatus_Nitrotoga;	0	0	1	0	0	0
Otu1493	3	Bacteria;Patescibacteria;CPR2;CPR2_or;CPR2_fa;CPR2;	0	0	1	1	1	0
Otu1494	3	Bacteria;Desulfobacterota;Desulfobacteria;Desulfobacterales;Desulfosarcinaceae;Sva0081_sediment_group;	0	0	2	0	0	0
Otu1495	8	Bacteria;Bacteroidota;Bacteroidia;Cytophagales;Spirosomaceae;Flectobacillus;	0	1	0	0	7	0
Otu1496	3	Bacteria;Verrucomicrobiota;Lentisphaeria;Lentisphaeria_unclassified;Lentisphaeria_unclassified;Lentisphaeria_unclassified;	0	1	1	0	0	0
Otu1497	3	Bacteria;Actinobacteriota;Actinobacteria;Micrococcales;Cellulomonadaceae;Pseudactinotalea;	1	1	0	0	1	0
Otu1498	4	Bacteria;Proteobacteria;Gammaproteobacteria;Burkholderiales;Comamonadaceae;Simplicispira;	0	0	3	0	1	0
Otu1499	6	Bacteria;Proteobacteria;Alphaproteobacteria;Rhizobiales;Xanthobacteraceae;Xanthobacter;	0	0	1	0	3	1
Otu1500	3	Bacteria;Verrucomicrobiota;Verrucomicrobiae;Verrucomicrobiales;Rubritaleaceae;uncultured;	0	0	0	1	0	0
Otu1501	4	Bacteria;Proteobacteria;Gammaproteobacteria;Burkholderiales;Comamonadaceae;Roseateles;	2	2	0	0	0	0
Otu1502	3	Bacteria;Actinobacteriota;Actinobacteria;Pseudonocardiales;Pseudonocardiaceae;Saccharothrix;	0	0	0	0	2	0
Otu1503	3	Bacteria;Firmicutes;Limnochordia;Limnochordia_unclassified;Limnochordia_unclassified;Limnochordia_unclassified;	0	1	1	0	0	0
Otu1504	3	Bacteria;Firmicutes;Limnochordia;Limnochordales;uncultured;uncultured;	1	0	0	0	0	1
Otu1505	3	Bacteria;Acidobacteriota;Vicinamibacteria;Vicinamibacteria_unclassified;Vicinamibacteria_unclassified;Vicinamibacteria_unclassified;	0	0	0	1	1	0
Otu1506	3	Bacteria;Actinobacteriota;Actinobacteria;Frankiales;Frankiaceae;Frankia;	0	0	0	0	0	0
Otu1507	3	Bacteria;Actinobacteriota;Actinobacteria;Streptosporangiales;Thermomonosporaceae;Thermobispora;	0	0	2	0	0	0
Otu1508	3	Bacteria;Proteobacteria;Gammaproteobacteria;Cellvibrionales;Halieaceae;Haliea;	0	0	0	0	2	0
Otu1509	7	Bacteria;Firmicutes;Bacilli;Bacillales;Bacillaceae;uncultured;	1	1	1	0	0	2
Otu1510	8	Bacteria;Firmicutes;Bacilli;Alicyclobacillales;Alicyclobacillaceae;Effusibacillus;	0	1	0	0	6	0
Otu1511	4	Bacteria;Firmicutes;Bacilli;Bacillales;Planococcaceae;Jeotgalibacillus;	1	0	0	0	0	0
Otu1512	5	Bacteria;Hydrogenedentes;Hydrogenedentia;Hydrogenedentiales;Hydrogenedensaceae;Hydrogenedensaceae_unclassified;	0	0	4	0	0	0
Otu1513	4	Bacteria;Verrucomicrobiota;Verrucomicrobiae;S-BQ2-57_soil_group;S-BQ2-57_soil_group_fa;S-BQ2-57_soil_group;	1	1	0	0	0	0
Otu1514	3	Bacteria;Proteobacteria;Alphaproteobacteria;Acetobacterales;Acetobacteraceae;Roseococcus;	1	0	0	0	0	0
Otu1515	3	Bacteria;Actinobacteriota;Actinobacteria;Micrococcales;Dermatophilaceae;Dermatophilaceae_unclassified;	1	0	1	0	0	1
Otu1516	3	Bacteria;Patescibacteria;Parcubacteria;Candidatus_Yanofskybacteria;Candidatus_Yanofskybacteria_fa;Candidatus_Yanofskybacteria;	0	0	0	0	0	0
Otu1517	7	Bacteria;Modulibacteria;Moduliflexia;Moduliflexales;Moduliflexaceae;Moduliflexaceae;	0	0	3	0	0	0
Otu1518	7	Archaea;Halobacterota;Methanomicrobia;Methanomicrobiales;Methanocorpusculaceae;Methanocorpusculum;	0	0	1	0	0	0
Otu1519	12	Bacteria;Verrucomicrobiota;Chlamydiae;Chlamydiales;Chlamydiaceae;Chlamydiaceae_unclassified;	0	0	0	1	0	0
Otu1520	3	Bacteria;Firmicutes;Limnochordia;uncultured;uncultured_fa;uncultured;	0	0	0	0	0	1
Otu1521	4	Bacteria;Actinobacteriota;Actinobacteria;Micrococcales;Micrococcaceae;Nesterenkonia;	0	0	0	1	0	1
Otu1522	3	Bacteria;Proteobacteria;Gammaproteobacteria;Burkholderiales;Comamonadaceae;Azohydromonas;	0	1	0	0	0	0
Otu1523	3	Bacteria;Firmicutes;Bacilli;Erysipelotrichales;Erysipelatoclostridiaceae;Catenibacterium;	1	0	0	0	0	0
Otu1524	3	Bacteria;Firmicutes;Clostridia;Lachnospirales;Lachnospiraceae;Mobilitalea;	0	0	0	0	0	0
Otu1525	2	Bacteria;Firmicutes;Desulfotomaculia;Desulfotomaculales;Desulfallas-Sporotomaculum;BRH-c8a;	1	0	0	1	0	0
Otu1526	2	Bacteria;Firmicutes;Clostridia;Oscillospirales;Oscillospiraceae;Oscillospira;	0	1	0	0	0	0
Otu1527	2	Bacteria;Firmicutes;Clostridia;Eubacteriales;Garciellaceae;Garciella;	0	0	0	1	0	0
Otu1528	2	Bacteria;Planctomycetota;Phycisphaerae;Phycisphaerales;Phycisphaeraceae;Phycisphaera;	0	0	1	0	0	0
Otu1529	7	Bacteria;Bacteroidota;Chlorobia;Chlorobiales;Chlorobiaceae;Chlorobaculum;	0	0	1	5	0	0
Otu1530	2	Bacteria;Proteobacteria;Alphaproteobacteria;Rhizobiales;Beijerinckiaceae;Salinarimonas;	0	2	0	0	0	0
Otu1531	3	Bacteria;Proteobacteria;Gammaproteobacteria;Pseudomonadales;Moraxellaceae;Enhydrobacter;	0	2	1	0	0	0
Otu1532	2	Bacteria;Chloroflexi;Ktedonobacteria;Ktedonobacterales;Ktedonobacteraceae;Ktedonobacteraceae;	0	0	0	0	0	0
Otu1533	2	Bacteria;Firmicutes;Negativicutes;Veillonellales-Selenomonadales;Sporomusaceae;Anaerospora;	0	0	0	0	0	0
Otu1534	2	Bacteria;Bacteroidota;Bacteroidia;Flavobacteriales;Flavobacteriaceae;Arenibacter;	0	0	0	0	0	0
Otu1535	2	Bacteria;Acidobacteriota;Subgroup_11;Subgroup_11_or;Subgroup_11_fa;Subgroup_11;	0	0	1	0	0	1
Otu1536	2	Bacteria;Actinobacteriota;Actinobacteria;0319-7L14;0319-7L14_fa;0319-7L14;	0	0	0	0	1	0
Otu1537	2	Bacteria;Actinobacteriota;Actinobacteria;Micrococcales;Micrococcaceae;Rothia;	0	0	0	0	0	0
Otu1538	2	Bacteria;Campilobacterota;Campylobacteria;Campylobacterales;Helicobacteraceae;Helicobacter;	0	1	0	0	1	0
Otu1539	2	Bacteria;Proteobacteria;Gammaproteobacteria;Burkholderiales;Chitinibacteraceae;Chitinibacter;	0	0	1	0	0	0
Otu1540	2	Bacteria;Firmicutes;Clostridia;Clostridiales;Clostridiaceae;Clostridium_sensu_stricto_2;	0	0	0	1	0	0
Otu1541	2	Bacteria;Actinobacteriota;Coriobacteriia;Coriobacteriales;Atopobiaceae;Atopobiaceae_unclassified;	0	0	1	1	0	0
Otu1542	2	Bacteria;Actinobacteriota;Actinobacteria;Nitriliruptorales;Nitriliruptoraceae;Nitriliruptoraceae;	0	1	0	1	0	0
Otu1543	2	Bacteria;Proteobacteria;Alphaproteobacteria;Paracaedibacterales;Paracaedibacteraceae;Paracaedibacteraceae;	0	0	0	0	0	0
Otu1544	2	Bacteria;Firmicutes;Clostridia;Oscillospirales;Ruminococcaceae;UCG-001;	0	0	0	1	0	0
Otu1545	2	Bacteria;Proteobacteria;Gammaproteobacteria;Burkholderiales;Comamonadaceae;uncultured;	1	0	1	0	0	0
Otu1546	2	Bacteria;Bacteroidota;Bacteroidia;Bacteroidales;Rikenellaceae;Rikenellaceae_unclassified;	0	0	0	0	0	0
Otu1547	3	Bacteria;Fibrobacterota;Chitinivibrionia;uncultured;uncultured_fa;uncultured;	0	0	2	0	1	0
Otu1548	2	Bacteria;Proteobacteria;Alphaproteobacteria;Rhodospirillales;Magnetospirillaceae;Telmatospirillum;	0	0	0	0	2	0
Otu1549	4	Bacteria;Verrucomicrobiota;Chlamydiae;Chlamydiales;Simkaniaceae;Simkania;	0	2	2	0	0	0
Otu1550	2	Bacteria;Myxococcota;Polyangia;Polyangiales;Polyangiaceae;Polyangiaceae;	0	0	0	1	0	0
Otu1551	2	Bacteria;Elusimicrobiota;Elusimicrobiota_unclassified;Elusimicrobiota_unclassified;Elusimicrobiota_unclassified;Elusimicrobiota_unclassified;	0	0	0	1	0	0
Otu1552	2	Bacteria;Firmicutes;Negativicutes;Veillonellales-Selenomonadales;Sporomusaceae;Acetonema;	1	0	0	0	0	1
Otu1553	2	Bacteria;Bacteroidota;Bacteroidia;SM1A07;SM1A07_fa;SM1A07;	0	0	1	0	0	0
Otu1554	2	Bacteria;Proteobacteria;Gammaproteobacteria;CHAB-XI-27;CHAB-XI-27_fa;CHAB-XI-27;	0	0	0	0	1	0
Otu1555	2	Bacteria;Firmicutes;Clostridia;Oscillospirales;Oscillospiraceae;UCG-003;	0	0	0	0	1	0
Otu1556	2	Bacteria;Patescibacteria;Saccharimonadia;Saccharimonadales;Saccharimonadaceae;Saccharimonadaceae;	0	0	0	0	0	0
Otu1557	3	Archaea;Halobacterota;Methanomicrobia;Methanomicrobiales;Methanomicrobiaceae;Methanomicrobiaceae_unclassified;	0	0	0	1	0	0
Otu1558	2	Bacteria;Proteobacteria;Gammaproteobacteria;Cellvibrionales;Cellvibrionales_unclassified;Cellvibrionales_unclassified;	0	0	0	1	0	1
Otu1559	2	Bacteria;Firmicutes;Clostridia;Eubacteriales;Garciellaceae;Irregularibacter;	0	0	0	0	0	2
Otu1560	2	Bacteria;Proteobacteria;Alphaproteobacteria;Zavarziniales;Zavarziniaceae;Zavarziniaceae;	0	1	0	1	0	0
Otu1561	2	Bacteria;Bacteroidota;Rhodothermia;Balneolales;Balneolaceae;uncultured;	0	1	0	1	0	0
Otu1562	2	Bacteria;Firmicutes;Bacilli;Bacillales;Bacillaceae;Pseudogracilibacillus;	1	0	0	1	0	0
Otu1563	4	Bacteria;Proteobacteria;Alphaproteobacteria;Ferrovibrionales;Ferrovibrionales_fa;Taonella;	0	0	1	0	0	0
Otu1564	2	Bacteria;Firmicutes;Bacilli;Bacillales;Bacillaceae;Anaerobacillus;	0	0	1	0	0	0
Otu1565	2	Bacteria;Actinobacteriota;Actinobacteria;Propionibacteriales;Propionibacteriaceae;Propionicicella;	0	0	1	0	0	0
Otu1566	2	Bacteria;Proteobacteria;Gammaproteobacteria;Xanthomonadales;Xanthomonadaceae;Xanthomonadaceae;	0	1	0	0	0	0
Otu1567	4	Bacteria;Myxococcota;Myxococcia;Myxococcales;Myxococcaceae;Cystobacter;	0	0	3	0	0	1
Otu1568	2	Bacteria;Planctomycetota;Planctomycetes;Gemmatales;Gemmataceae;Telmatocola;	0	0	0	1	0	0
Otu1569	3	Bacteria;Proteobacteria;Gammaproteobacteria;Burkholderiales;Alcaligenaceae;uncultured;	0	0	1	0	1	0
Otu1570	2	Bacteria;Proteobacteria;Gammaproteobacteria;Burkholderiales;Rhodocyclaceae;Dechloromonas;	1	0	0	0	1	0
Otu1571	2	Bacteria;Proteobacteria;Gammaproteobacteria;WD260;WD260_fa;WD260;	0	0	1	0	1	0
Otu1572	2	Bacteria;Actinobacteriota;Actinobacteria;Euzebyales;Euzebyaceae;Euzebyaceae_unclassified;	1	0	0	1	0	0
Otu1573	2	Bacteria;Verrucomicrobiota;Kiritimatiellae;Kiritimatiellales;Kiritimatiellaceae;R76-B128;	0	0	1	0	0	0
Otu1574	2	Bacteria;Firmicutes;Clostridia;Peptostreptococcales-Tissierellales;Anaerovoracaceae;Amnipila;	0	1	0	0	1	0
Otu1575	2	Bacteria;Proteobacteria;Gammaproteobacteria;Acidithiobacillales;Acidithiobacillaceae;TX1A-55;	0	0	1	0	0	1
Otu1576	2	Bacteria;Bacteroidota;Bacteroidia;Flavobacteriales;Weeksellaceae;Bergeyella;	0	0	0	0	0	0
Otu1577	2	Bacteria;Actinobacteriota;Coriobacteriia;Coriobacteriales;Coriobacteriaceae;Collinsella;	0	1	0	0	0	0
Otu1578	2	Archaea;Crenarchaeota;Nitrososphaeria;Group_1.1c;Group_1.1c_fa;Group_1.1c;	1	0	0	0	0	0
Otu1579	5	Bacteria;Proteobacteria;Gammaproteobacteria;Cellvibrionales;Porticoccaceae;Porticoccus;	0	0	2	0	0	1
Otu1580	2	Bacteria;Bacteroidota;Bacteroidia;Bacteroidales;Rikenellaceae;Anaerocella;	0	0	1	0	1	0
Otu1581	14	Bacteria;Firmicutes;Clostridia;Peptostreptococcales-Tissierellales;Peptostreptococcaceae;Paraclostridium;	3	5	0	1	0	1
Otu1582	6	Bacteria;Bacteroidota;Ignavibacteria;Ignavibacteriales;Melioribacteraceae;IheB3-7;	0	0	6	0	0	0
Otu1583	2	Bacteria;Firmicutes;Dethiobacteria;Dethiobacterales;Dethiobacteraceae;uncultured;	1	0	0	0	0	1
Otu1584	2	Bacteria;Proteobacteria;Alphaproteobacteria;Sphingomonadales;Sphingomonadaceae;Polymorphobacter;	0	1	0	0	0	1
Otu1585	2	Bacteria;Proteobacteria;Gammaproteobacteria;Burkholderiales;Oxalobacteraceae;Janthinobacterium;	0	0	0	0	0	0
Otu1586	2	Bacteria;Acidobacteriota;Acidobacteriae;Acidobacteriales;Acidobacteriaceae_(Subgroup_1);Bryocella;	0	0	0	0	0	0
Otu1587	2	Bacteria;Verrucomicrobiota;Verrucomicrobiae;Opitutales;Opitutaceae;Diplosphaera;	0	0	0	0	1	0
Otu1588	2	Bacteria;Firmicutes;Clostridia;Lachnospirales;Lachnospiraceae;Dorea;	0	1	0	0	0	0
Otu1589	2	Bacteria;Acidobacteriota;d142;d142_or;d142_fa;d142;	0	0	0	0	0	0
Otu1590	2	Bacteria;Firmicutes;Negativicutes;Veillonellales-Selenomonadales;Selenomonadaceae;Mitsuokella;	1	0	0	0	0	0
Otu1591	2	Bacteria;Actinobacteriota;Coriobacteriia;CG2-30-50-142;CG2-30-50-142_fa;CG2-30-50-142;	0	1	0	0	0	0
Otu1592	2	Bacteria;Actinobacteriota;Actinobacteria;Pseudonocardiales;Pseudonocardiaceae;Kibdelosporangium;	0	0	0	1	0	0
Otu1593	2	Bacteria;Proteobacteria;Alphaproteobacteria;Puniceispirillales;uncultured;uncultured;	0	1	0	0	0	0
Otu1594	2	Bacteria;Chloroflexi;Dehalococcoidia;FW22;FW22_fa;FW22;	0	0	0	1	1	0
Otu1595	2	Bacteria;Proteobacteria;Alphaproteobacteria;Rhodobacterales;Rhodobacteraceae;Methylarcula;	0	0	1	0	0	0
Otu1596	2	Bacteria;Verrucomicrobiota;Lentisphaeria;Victivallales;Victivallaceae;Victivallaceae;	0	0	1	0	0	0
Otu1597	2	Bacteria;Campilobacterota;Campylobacteria;Campylobacterales;Sulfurimonadaceae;Sulfurimonas;	0	0	2	0	0	0
Otu1598	2	Bacteria;Bdellovibrionota;Oligoflexia;Silvanigrellales;Silvanigrellaceae;Silvanigrellaceae_unclassified;	0	1	0	0	0	0
Otu1599	2	Bacteria;Firmicutes;Clostridia;Oscillospirales;Ruminococcaceae;Subdoligranulum;	0	0	1	0	0	0
Otu1600	2	Bacteria;Proteobacteria;Alphaproteobacteria;Rhizobiales;Beijerinckiaceae;uncultured;	1	0	0	1	0	0
Otu1601	2	Bacteria;Verrucomicrobiota;Lentisphaeria;Oligosphaerales;Oligosphaeraceae;Oligosphaera;	0	0	1	0	0	0
Otu1602	2	Bacteria;Firmicutes;Clostridia;Lachnospirales;Lachnospiraceae;Tyzzerella;	0	0	0	0	0	0
Otu1603	2	Bacteria;Bacteroidota;Bacteroidia;Bacteroidales;Rikenellaceae;dgA-11_gut_group;	0	0	1	1	0	0
Otu1604	2	Bacteria;Patescibacteria;Parcubacteria;Candidatus_Liptonbacteria;Candidatus_Liptonbacteria_fa;Candidatus_Liptonbacteria;	0	0	0	1	0	0
Otu1605	2	Bacteria;Proteobacteria;Alphaproteobacteria;Azospirillales;uncultured;uncultured;	0	0	0	0	0	0
Otu1606	2	Bacteria;Proteobacteria;Gammaproteobacteria;EC3;EC3_fa;EC3;	1	0	0	1	0	0
Otu1607	4	Bacteria;Proteobacteria;Gammaproteobacteria;Burkholderiales;Rhodocyclaceae;Propionivibrio;	0	0	0	0	0	0
Otu1608	2	Bacteria;Actinobacteriota;Actinobacteria;Frankiales;Geodermatophilaceae;Klenkia;	0	0	1	0	0	1
Otu1609	2	Bacteria;Proteobacteria;Alphaproteobacteria;Rhizobiales;Xanthobacteraceae;Oligotropha;	0	0	0	1	0	0
Otu1610	2	Bacteria;Firmicutes;Negativicutes;Veillonellales-Selenomonadales;Veillonellaceae;Veillonella;	0	0	0	0	0	0
Otu1611	7	Bacteria;Bacteroidota;Bacteroidia;Bacteroidales;ML635J-40_aquatic_group;ML635J-40_aquatic_group;	0	0	4	0	0	0
Otu1612	2	Bacteria;Firmicutes;Clostridia;Oscillospirales;Oscillospiraceae;Oscillibacter;	0	0	1	0	1	0
Otu1613	2	Bacteria;Firmicutes;Bacilli;Erysipelotrichales;Erysipelatoclostridiaceae;Erysipelatoclostridium;	0	1	0	0	0	0
Otu1614	2	Bacteria;Methylomirabilota;Methylomirabilia;Rokubacteriales;WX65;WX65;	1	1	0	0	0	0
Otu1615	2	Bacteria;Proteobacteria;Gammaproteobacteria;Competibacterales;Competibacteraceae;Candidatus_Competibacter;	0	0	1	0	0	0
Otu1616	2	Bacteria;Firmicutes;Bacilli;Bacillales;Planococcaceae;Viridibacillus;	0	1	0	0	0	0
Otu1617	2	Bacteria;Firmicutes;Clostridia;Peptostreptococcales-Tissierellales;Peptostreptococcales-Tissierellales_fa;Gallicola;	0	0	0	0	1	0
Otu1618	3	Bacteria;Firmicutes;Bacilli;Lactobacillales;Streptococcaceae;Lactococcus;	0	1	1	0	0	0
Otu1619	4	Bacteria;Firmicutes;Clostridia;Peptostreptococcales-Tissierellales;Peptostreptococcaceae;Proteocatella;	0	0	1	0	0	0
Otu1620	2	Bacteria;Actinobacteriota;Actinobacteria;Micromonosporales;Micromonosporaceae;Xiangella;	0	0	0	0	0	0
Otu1621	2	Bacteria;Verrucomicrobiota;Chlamydiae;Chlamydiales;Simkaniaceae;Ga0074140;	0	0	1	0	0	1
Otu1622	2	Bacteria;Proteobacteria;Alphaproteobacteria;Rhizobiales;Stappiaceae;Polymorphum;	0	0	0	1	0	0
Otu1623	2	Archaea;Halobacterota;Halobacteria;Halobacterales;Haloferacaceae;Natronococcus;	0	0	0	0	0	0
Otu1624	2	Bacteria;Actinobacteriota;Actinobacteria;Actinomycetales;Actinomycetaceae;Actinomyces;	0	2	0	0	0	0
Otu1625	2	Bacteria;Proteobacteria;Alphaproteobacteria;Rhizobiales;Pleomorphomonadaceae;Pleomorphomonadaceae_unclassified;	0	0	1	0	0	0
Otu1626	2	Bacteria;Firmicutes;Negativicutes;Veillonellales-Selenomonadales;Veillonellaceae;Megasphaera;	0	0	0	0	1	0
Otu1627	2	Bacteria;Firmicutes;Symbiobacteriia;Symbiobacteriales;Symbiobacteraceae;uncultured;	0	1	0	0	1	0
Otu1628	2	Bacteria;Actinobacteriota;Thermoleophilia;Thermophilales;Thermoleophilaceae;Thermoleophilum;	0	2	0	0	0	0
Otu1629	2	Bacteria;Cyanobacteria;Cyanobacteriia;Oxyphotobacteria_Incertae_Sedis;Unknown_Family;CENA518;	0	0	0	0	0	0
Otu1630	2	Bacteria;Bacteroidota;Bacteroidia;Sphingobacteriales;KD1-131;KD1-131;	0	0	0	2	0	0
Otu1631	3	Bacteria;Bacteroidota;Bacteroidia;Cytophagales;Amoebophilaceae;uncultured;	2	0	0	0	0	0
Otu1632	6	Bacteria;Spirochaetota;Spirochaetia;Spirochaetales;Spirochaetaceae;Sphaerochaeta;	0	0	0	0	0	0
Otu1633	2	Bacteria;Firmicutes;Bacilli;Erysipelotrichales;Erysipelotrichaceae;Dubosiella;	0	1	1	0	0	0
Otu1634	4	Bacteria;Acidobacteriota;Vicinamibacteria;Subgroup_9;Subgroup_9_fa;Subgroup_9;	1	0	0	3	0	0
Otu1635	13	Bacteria;Proteobacteria;Gammaproteobacteria;Acidiferrobacterales;Acidiferrobacteraceae;Acidiferrobacteraceae_unclassified;	6	6	0	1	0	0
Otu1636	2	Bacteria;Proteobacteria;Alphaproteobacteria;Rhizobiales;Lutibaculaceae;Lutibaculum;	0	0	0	0	0	0
Otu1637	3	Bacteria;Fermentibacterota;Fermentibacteria;Fermentibacterales;Fermentibacteraceae;Fermentibacteraceae;	0	0	1	0	0	0
Otu1638	4	Bacteria;Firmicutes;Bacilli;Lactobacillales;Carnobacteriaceae;uncultured;	0	0	4	0	0	0
Otu1639	2	Bacteria;Proteobacteria;Gammaproteobacteria;Burkholderiales;Comamonadaceae;Tepidimonas;	0	0	0	0	0	0
Otu1640	2	Bacteria;Proteobacteria;Alphaproteobacteria;Puniceispirillales;Puniceispirillales_unclassified;Puniceispirillales_unclassified;	0	0	0	0	1	0
Otu1641	27	Bacteria;Firmicutes;Bacilli;Bacillales;Planococcaceae;Rummeliibacillus;	0	3	2	1	12	0
Otu1642	3	Bacteria;Firmicutes;Clostridia;Peptostreptococcales-Tissierellales;Anaerovoracaceae;Family_XIII_UCG-001;	0	0	0	0	1	0
Otu1643	2	Bacteria;Desulfobacterota;Desulfobulbia;Desulfobulbales;Desulfobulbaceae;Desulfobulbaceae_unclassified;	0	0	2	0	0	0
Otu1644	2	Bacteria;Proteobacteria;Gammaproteobacteria;Burkholderiales;Oxalobacteraceae;CM1G08;	0	0	0	1	0	0
Otu1645	3	Bacteria;Dependentiae;Babeliae;Babeliales;Babeliaceae;Candidatus_Babela;	0	1	1	0	0	0
Otu1646	2	Bacteria;Proteobacteria;Gammaproteobacteria;Burkholderiales;Comamonadaceae;Rhodoferax;	0	0	2	0	0	0
Otu1647	2	Bacteria;Acidobacteriota;Blastocatellia;Pyrinomonadales;Pyrinomonadaceae;Pyrinomonadaceae_unclassified;	0	0	0	0	1	0
Otu1648	2	Bacteria;Actinobacteriota;Actinobacteria;Streptosporangiales;Streptosporangiaceae;Acrocarpospora;	0	1	0	0	0	0
Otu1649	2	Bacteria;Proteobacteria;Alphaproteobacteria;Rickettsiales;Rickettsiales_fa;Candidatus_Jidaibacter;	0	1	0	0	0	0
Otu1650	2	Bacteria;Bacteroidota;Bacteroidia;Chitinophagales;Chitinophagaceae;Chitinophagaceae;	0	0	0	1	0	0
Otu1651	4	Bacteria;Proteobacteria;Gammaproteobacteria;Burkholderiales;Gallionellaceae;uncultured;	0	0	0	0	2	0
Otu1652	2	Bacteria;Myxococcota;Polyangia;Nannocystales;Nannocystaceae;Enhygromyxa;	0	0	0	0	0	0
Otu1653	4	Bacteria;Firmicutes;Bacilli;Bacillales;Planococcaceae;Psychrobacillus;	1	1	0	0	0	0
Otu1654	2	Bacteria;Proteobacteria;Gammaproteobacteria;Enterobacterales;Erwiniaceae;Pantoea;	0	0	1	0	0	1
Otu1655	4	Bacteria;Proteobacteria;Gammaproteobacteria;Enterobacterales;Enterobacteriaceae;Klebsiella;	1	0	1	0	0	0
Otu1656	4	Bacteria;Bacteroidota;Bacteroidia;Cytophagales;Cytophagaceae;Siphonobacter;	0	2	0	0	0	0
Otu1657	2	Bacteria;Firmicutes;Bacilli;Bacillales;Bacillaceae;Amphibacillus;	0	1	0	1	0	0
Otu1658	2	Bacteria;Firmicutes;Clostridia;Lachnospirales;Lachnospiraceae;Howardella;	1	1	0	0	0	0
Otu1659	2	Archaea;Crenarchaeota;Nitrososphaeria;Nitrososphaerales;Nitrososphaeraceae;Candidatus_Nitrososphaera;	1	1	0	0	0	0
Otu1660	2	Bacteria;Firmicutes;Bacilli;Acholeplasmatales;Acholeplasmataceae;Acholeplasmataceae_unclassified;	0	0	0	0	0	0
Otu1661	2	Bacteria;Firmicutes;Bacilli;RsaHf231;RsaHf231_fa;RsaHf231;	0	2	0	0	0	0
Otu1662	2	Bacteria;Patescibacteria;Microgenomatia;Candidatus_Woykebacteria;Candidatus_Woykebacteria_fa;Candidatus_Woykebacteria;	0	0	0	1	0	1
Otu1663	2	Bacteria;Methylomirabilota;Methylomirabilia;Methylomirabilales;Methylomirabilaceae;Sh765B-TzT-35;	0	0	1	0	0	0
Otu1664	2	Bacteria;Acidobacteriota;Holophagae;Holophagales;Holophagaceae;Holophaga;	0	0	0	0	2	0
Otu1665	2	Bacteria;Bdellovibrionota;Bdellovibrionia;Bacteriovoracales;Bacteriovoracaceae;Bacteriovoracaceae_unclassified;	0	1	0	0	1	0
Otu1666	6	Bacteria;Spirochaetota;Spirochaetia;Spirochaetales;Spirochaetaceae;Spirochaeta_2;	0	0	6	0	0	0
Otu1667	2	Bacteria;Bacteroidota;Bacteroidia;Bacteroidales;Rikenellaceae;uncultured;	0	0	0	1	0	0
Otu1668	2	Bacteria;Chloroflexi;Dehalococcoidia;RBG-13-46-9;RBG-13-46-9_fa;RBG-13-46-9;	0	0	1	1	0	0
Otu1669	2	Bacteria;Bacteroidota;Bacteroidia;Bacteroidales;Prevotellaceae;uncultured;	1	0	0	0	0	0
Otu1670	2	Bacteria;Bacteroidota;Bacteroidia;Chitinophagales;Chitinophagaceae;Heliimonas;	0	0	0	0	2	0
Otu1671	3	Bacteria;Desulfobacterota;Desulfobulbia;Desulfobulbales;Desulfobulbaceae;uncultured;	0	0	0	1	0	0
Otu1672	2	Bacteria;Firmicutes;Clostridia;Clostridiales;Clostridiaceae;Clostridium_sensu_stricto_9;	0	1	0	0	0	1
Otu1673	2	Bacteria;Proteobacteria;Alphaproteobacteria;Sphingomonadales;Sphingomonadaceae;Croceicoccus;	0	1	0	0	0	1
Otu1674	2	Bacteria;Proteobacteria;Alphaproteobacteria;Rhizobiales;Beijerinckiaceae;Qingshengfania;	0	0	0	0	0	0
Otu1675	2	Bacteria;Verrucomicrobiota;Verrucomicrobiae;Chthoniobacterales;uncultured;uncultured;	0	0	0	0	1	0
Otu1676	3	Bacteria;Proteobacteria;Alphaproteobacteria;Sphingomonadales;Sphingomonadaceae;SD04E11;	1	0	0	0	1	0
Otu1677	2	Bacteria;Chloroflexi;Ktedonobacteria;Ktedonobacterales;Ktedonobacteraceae;JG30a-KF-32;	0	1	0	0	0	0
Otu1678	2	Bacteria;Proteobacteria;Gammaproteobacteria;Burkholderiales;Comamonadaceae;Xenophilus;	0	0	0	0	1	0
Otu1679	2	Bacteria;Firmicutes;Clostridia;Clostridiales;Caloramatoraceae;uncultured;	0	2	0	0	0	0
Otu1680	2	Bacteria;Firmicutes;Bacilli;Bacillales;Bacillaceae;Geobacillus;	1	1	0	0	0	0
Otu1681	2	Bacteria;Desulfobacterota;Desulfuromonadia;Geobacterales;Geobacterales_unclassified;Geobacterales_unclassified;	1	0	1	0	0	0
Otu1682	2	Bacteria;Proteobacteria;Gammaproteobacteria;Pseudomonadales;Pseudomonadaceae;Azotobacter;	0	0	0	0	0	0
Otu1683	2	Bacteria;Cyanobacteria;Cyanobacteriia;Cyanobacteriales;Nostocaceae;Mastigocladopsis_PCC-10914;	0	0	0	2	0	0
Otu1684	2	Bacteria;Proteobacteria;Alphaproteobacteria;Rhizobiales;Pleomorphomonadaceae;Pleomorphomonas;	0	1	0	0	0	0
Otu1685	4	Bacteria;Bacteroidota;Bacteroidia;Cytophagales;Spirosomaceae;Fibrisoma;	0	0	0	0	0	2
Otu1686	2	Bacteria;Acidobacteriota;Thermoanaerobaculia;Thermoanaerobaculales;Thermoanaerobaculaceae;Subgroup_23;	0	0	0	0	0	0
Otu1687	2	Bacteria;Bacteroidota;Rhodothermia;Balneolales;Balneolaceae;Balneolaceae_unclassified;	0	0	0	0	0	0
Otu1688	2	Bacteria;Bacteroidota;Bacteroidia;Bacteroidales;Tannerellaceae;Parabacteroides;	0	0	1	0	0	0
Otu1689	9	Archaea;Thermoplasmatota;Thermoplasmata;Methanomassiliicoccales;Methanomassiliicoccaceae;uncultured;	0	0	0	5	0	0
Otu1690	2	Bacteria;Proteobacteria;Alphaproteobacteria;Rhizobiales;Rhizobiaceae;Neorhizobium;	0	0	0	2	0	0
Otu1691	2	Bacteria;Actinobacteriota;Actinobacteria;Frankiales;Cryptosporangiaceae;Cryptosporangium;	0	1	0	0	0	0
Otu1692	2	Bacteria;Synergistota;Synergistia;Synergistales;Synergistaceae;Synergistaceae_unclassified;	0	0	2	0	0	0
Otu1693	2	Bacteria;Synergistota;Synergistia;Synergistales;Synergistaceae;Lactivibrio;	0	0	1	0	0	0
Otu1694	4	Bacteria;Proteobacteria;Gammaproteobacteria;Burkholderiales;Methylophilaceae;Methylophilaceae;	0	0	0	1	0	0
Otu1695	2	Bacteria;Planctomycetota;028H05-P-BN-P5;028H05-P-BN-P5_or;028H05-P-BN-P5_fa;028H05-P-BN-P5;	0	0	0	1	0	0
Otu1696	3	Bacteria;Firmicutes;Clostridia;Oscillospirales;Oscillospiraceae;uncultured;	0	1	0	0	1	0
Otu1697	4	Bacteria;Bacteroidota;Bacteroidia;Cytophagales;Hymenobacteraceae;Rufibacter;	0	2	0	0	0	0
Otu1698	2	Bacteria;Proteobacteria;Alphaproteobacteria;Paracaedibacterales;Paracaedibacteraceae;uncultured;	0	0	1	0	1	0
Otu1699	2	Bacteria;Cyanobacteria;Cyanobacteriia;Cyanobacteriales;Chroococcidiopsaceae;Chroococcidiopsis_PCC_7203;	0	0	1	0	0	1
Otu1700	2	Bacteria;Spirochaetota;Spirochaetia;Spirochaetales;Spirochaetaceae;Sediminispirochaeta;	0	0	2	0	0	0
Otu1701	2	Bacteria;Proteobacteria;Gammaproteobacteria;Cellvibrionales;Cellvibrionaceae;Aestuariicella;	1	0	0	1	0	0
Otu1702	2	Bacteria;Proteobacteria;Gammaproteobacteria;Burkholderiales;Nitrosomonadaceae;DSSD61;	0	1	1	0	0	0
Otu1703	2	Bacteria;Bacteroidota;Bacteroidia;Flavobacteriales;Flavobacteriaceae;Subsaxibacter;	0	1	0	1	0	0
Otu1704	2	Bacteria;Myxococcota;Myxococcia;Myxococcales;Myxococcaceae;Corallococcus;	0	0	1	0	0	1
Otu1705	2	Bacteria;Myxococcota;Myxococcia;Myxococcales;Myxococcaceae;Vitiosangium;	0	0	0	0	0	0
Otu1706	3	Bacteria;Cloacimonadota;Cloacimonadia;Cloacimonadales;SHA-4;SHA-4;	0	0	1	2	0	0
Otu1707	2	Bacteria;Firmicutes;Desulfitobacteriia;Desulfitobacteriales;Desulfitobacteriales_unclassified;Desulfitobacteriales_unclassified;	0	1	0	1	0	0
Otu1708	2	Bacteria;Proteobacteria;Gammaproteobacteria;Burkholderiales;Rhodocyclaceae;Candidatus_Accumulibacter;	0	2	0	0	0	0
Otu1709	18	Bacteria;Proteobacteria;Gammaproteobacteria;Steroidobacterales;Woeseiaceae;Woeseiaceae_unclassified;	5	0	4	1	1	0
Otu1710	2	Bacteria;Proteobacteria;Alphaproteobacteria;Elsterales;Elsteraceae;Aliidongia;	0	0	1	0	0	0
Otu1711	1	Bacteria;Proteobacteria;Gammaproteobacteria;Enterobacterales;Erwiniaceae;Izhakiella;	0	1	0	0	0	0
Otu1712	2	Bacteria;Proteobacteria;Gammaproteobacteria;Xanthomonadales;Rhodanobacteraceae;Aquimonas;	0	0	0	1	0	0
Otu1713	1	Bacteria;Actinobacteriota;Actinobacteria;Actinomycetales;Actinomycetaceae;Flaviflexus;	0	0	0	0	0	0
Otu1714	1	Bacteria;Proteobacteria;Alphaproteobacteria;Rhodobacterales;Rhodobacteraceae;Tropicimonas;	0	0	0	0	1	0
Otu1715	1	Bacteria;Desulfobacterota;Syntrophobacteria;Syntrophobacterales;Syntrophobacteraceae;Desulforhabdus;	1	0	0	0	0	0
Otu1716	1	Archaea;Thermoplasmatota;Thermoplasmata;Methanomassiliicoccales;Methanomethylophilaceae;RumEn_M2;	0	0	0	1	0	0
Otu1717	1	Bacteria;Proteobacteria;Gammaproteobacteria;Enterobacterales;Morganellaceae;Proteus;	0	0	0	0	0	0
Otu1718	1	Bacteria;Actinobacteriota;Actinobacteria;Micrococcales;Dermabacteraceae;Dermabacteraceae_unclassified;	0	0	0	1	0	0
Otu1719	1	Bacteria;Firmicutes;Clostridia;Clostridia_or;Hungateiclostridiaceae;Hungateiclostridiaceae;	0	0	0	0	0	0
Otu1720	1	Bacteria;Proteobacteria;Gammaproteobacteria;Xanthomonadales;Rhodanobacteraceae;Chujaibacter;	0	0	0	0	0	0
Otu1721	1	Bacteria;Firmicutes;Bacilli;Bacillales;Bacillaceae;Piscibacillus;	0	1	0	0	0	0
Otu1722	1	Bacteria;Bacteroidota;Bacteroidia;Bacteroidales;Muribaculaceae;CAG-873;	0	0	0	0	0	0
Otu1723	1	Bacteria;Bacteroidota;Bacteroidia;Bacteroidales;Prevotellaceae;Prevotellaceae_UCG-001;	0	1	0	0	0	0
Otu1724	1	Bacteria;Bacteroidota;Bacteroidia;Chitinophagales;Chitinophagaceae;Filimonas;	0	0	0	0	0	0
Otu1725	1	Bacteria;Proteobacteria;Gammaproteobacteria;Burkholderiales;Sutterellaceae;Sutterella;	1	0	0	0	0	0
Otu1726	1	Bacteria;Firmicutes;Clostridia;Lachnospirales;uncultured;uncultured;	0	0	0	0	1	0
Otu1727	1	Bacteria;Bacteroidota;Bacteroidia;Bacteroidales;Prevotellaceae;Prevotellaceae_UCG-003;	0	0	0	0	0	1
Otu1728	1	Bacteria;Desulfobacterota;Desulfobacteria;Desulfobacterales;Desulfobacterales_unclassified;Desulfobacterales_unclassified;	0	0	0	0	0	0
Otu1729	1	Bacteria;Proteobacteria;Alphaproteobacteria;Rhizobiales;WC3-116;WC3-116;	0	0	0	1	0	0
Otu1730	1	Bacteria;Actinobacteriota;Actinobacteria;Micrococcales;Micrococcaceae;Neomicrococcus;	0	0	0	0	0	0
Otu1731	1	Bacteria;Proteobacteria;Alphaproteobacteria;Azospirillales;Azospirillaceae;Desertibacter;	0	0	0	0	0	1
Otu1732	1	Bacteria;Verrucomicrobiota;Kiritimatiellae;113B434;113B434_fa;113B434;	0	1	0	0	0	0
Otu1733	1	Bacteria;Verrucomicrobiota;Chlamydiae;Chlamydiales;Simkaniaceae;Candidatus_Fritschea;	0	0	0	0	0	0
Otu1734	1	Bacteria;Firmicutes;Clostridia;Eubacteriales;Eubacteriaceae;Eubacterium;	0	1	0	0	0	0
Otu1735	4	Bacteria;Firmicutes;Bacilli;Erysipelotrichales;Erysipelotrichaceae;Faecalitalea;	0	0	0	0	4	0
Otu1736	1	Bacteria;Bacteroidota;Bacteroidia;Cytophagales;Spirosomaceae;uncultured;	0	0	0	0	0	0
Otu1737	1	Bacteria;Actinobacteriota;Actinobacteria;Micrococcales;Intrasporangiaceae;Knoellia;	0	0	0	0	0	0
Otu1738	1	Bacteria;Actinobacteriota;Actinobacteria;Nitriliruptorales;Nitriliruptoraceae;Nitriliruptoraceae_unclassified;	0	0	0	0	0	1
Otu1739	1	Bacteria;Proteobacteria;Alphaproteobacteria;Kiloniellales;Fodinicurvataceae;Fodinicurvataceae_unclassified;	0	0	1	0	0	0
Otu1740	1	Bacteria;Firmicutes;Bacilli;Bacillales;Bacillaceae;Ornithinibacillus;	0	0	0	0	0	0
Otu1741	2	Bacteria;Spirochaetota;V2072-189E03;V2072-189E03_or;V2072-189E03_fa;V2072-189E03;	0	0	1	0	0	0
Otu1742	1	Bacteria;Desulfobacterota;Desulfuromonadia;Desulfuromonadia_or;Desulfuromonadia_fa;Desulfuromonadia;	0	0	0	1	0	0
Otu1743	1	Bacteria;Patescibacteria;Parcubacteria;Candidatus_Spechtbacteria;Candidatus_Spechtbacteria_fa;Candidatus_Spechtbacteria;	0	0	1	0	0	0
Otu1744	13	Bacteria;Proteobacteria;Gammaproteobacteria;Burkholderiales;Comamonadaceae;Paucibacter;	0	1	0	0	12	0
Otu1745	1	Bacteria;Bdellovibrionota;Oligoflexia;Oligoflexales;Oligoflexales_fa;Pseudobacteriovorax;	1	0	0	0	0	0
Otu1746	1	Bacteria;Proteobacteria;Alphaproteobacteria;Rhizobiales;Methylopilaceae;Hansschlegelia;	0	0	0	0	0	0
Otu1747	2	Bacteria;Firmicutes;Clostridia;Lachnospirales;Lachnospiraceae;Lachnospiraceae_FCS020_group;	0	0	0	0	1	0
Otu1748	8	Bacteria;Proteobacteria;Alphaproteobacteria;Sphingomonadales;Sphingomonadaceae;Rhizorhapis;	4	0	0	0	3	1
Otu1749	1	Bacteria;Proteobacteria;Gammaproteobacteria;Burkholderiales;Comamonadaceae;Kinneretia;	0	0	0	0	0	0
Otu1750	1	Bacteria;Proteobacteria;Alphaproteobacteria;Acetobacterales;Acetobacteraceae;Gluconacetobacter;	0	0	1	0	0	0
Otu1751	1	Bacteria;Cyanobacteria;Cyanobacteriia;Cyanobacteriales;Microcystaceae;Pleurocapsa_PCC-7327;	0	0	0	1	0	0
Otu1752	1	Bacteria;Firmicutes;Clostridia;Clostridiales;Clostridiaceae;Sarcina;	0	0	1	0	0	0
Otu1753	1	Bacteria;Proteobacteria;Gammaproteobacteria;sediment-surface35;sediment-surface35_fa;sediment-surface35;	1	0	0	0	0	0
Otu1754	1	Bacteria;Proteobacteria;Gammaproteobacteria;Xanthomonadales;Rhodanobacteraceae;Rhodanobacteraceae;	0	0	0	1	0	0
Otu1755	1	Bacteria;Actinobacteriota;Actinobacteria;Micrococcales;Microbacteriaceae;Herbiconiux;	0	0	0	0	1	0
Otu1756	2	Bacteria;Actinobacteriota;Actinobacteria;Frankiales;Frankiaceae;Frankiaceae_unclassified;	0	0	0	0	0	0
Otu1757	1	Bacteria;Proteobacteria;Alphaproteobacteria;Rhizobiales;Stappiaceae;Stappia;	0	1	0	0	0	0
Otu1758	1	Bacteria;Desulfobacterota;Desulfuromonadia;Geobacterales;Geobacteraceae;Trichlorobacter;	0	0	1	0	0	0
Otu1759	1	Bacteria;Firmicutes;Bacilli;Paenibacillales;Paenibacillaceae;Xylanibacillus;	0	0	1	0	0	0
Otu1760	1	Bacteria;Acidobacteriota;Thermoanaerobaculia;Thermoanaerobaculales;Thermoanaerobaculaceae;Thermoanaerobaculaceae_unclassified;	0	0	1	0	0	0
Otu1761	1	Bacteria;Actinobacteriota;RBG-16-55-12;RBG-16-55-12_or;RBG-16-55-12_fa;RBG-16-55-12;	0	0	1	0	0	0
Otu1762	1	Bacteria;Firmicutes;Moorellia;Moorellales;Moorellaceae;Moorella;	0	0	1	0	0	0
Otu1763	1	Bacteria;Firmicutes;Clostridia;Clostridia_or;Hungateiclostridiaceae;Pseudoclostridium;	0	1	0	0	0	0
Otu1764	1	Bacteria;Proteobacteria;Gammaproteobacteria;Methylococcales;Methylomonadaceae;Crenothrix;	0	0	1	0	0	0
Otu1765	1	Bacteria;Proteobacteria;Gammaproteobacteria;Xanthomonadales;uncultured;uncultured;	0	0	1	0	0	0
Otu1766	1	Bacteria;DTB120;DTB120_cl;DTB120_or;DTB120_fa;DTB120;	0	0	1	0	0	0
Otu1767	1	Bacteria;Bacteroidota;Bacteroidia;Bacteroidales;GZKB124;GZKB124;	0	0	1	0	0	0
Otu1768	1	Bacteria;Gemmatimonadota;Longimicrobia;Longimicrobiales;Longimicrobiaceae;Longimicrobium;	0	0	1	0	0	0
Otu1769	1	Bacteria;Firmicutes;Bacilli;Bacillales;Planococcaceae;Chungangia;	0	0	1	0	0	0
Otu1770	1	Bacteria;Proteobacteria;Gammaproteobacteria;Methylococcales;Methylococcales_unclassified;Methylococcales_unclassified;	0	0	1	0	0	0
Otu1771	1	Bacteria;Actinobacteriota;Actinobacteria;KIST-JJY010;KIST-JJY010_fa;KIST-JJY010;	0	1	0	0	0	0
Otu1772	1	Bacteria;Proteobacteria;Gammaproteobacteria;Burkholderiales;Comamonadaceae;Methylibium;	0	1	0	0	0	0
Otu1773	1	Bacteria;Acidobacteriota;Blastocatellia;Blastocatellales;Blastocatellaceae;OLB17;	0	0	1	0	0	0
Otu1774	1	Bacteria;Actinobacteriota;Actinobacteria;Micrococcales;Intrasporangiaceae;Ornithinibacter;	0	1	0	0	0	0
Otu1775	1	Bacteria;Firmicutes;Clostridia;Lachnospirales;Lachnospiraceae;GCA-900066575;	0	0	0	0	1	0
Otu1776	1	Bacteria;Proteobacteria;Alphaproteobacteria;Rickettsiales;Candidatus_Hepatincola;Candidatus_Hepatincola;	0	0	1	0	0	0
Otu1777	1	Bacteria;Actinobacteriota;Actinobacteria;Micrococcales;Microbacteriaceae;Schumannella;	0	1	0	0	0	0
Otu1778	1	Bacteria;Firmicutes;Clostridia;Clostridiales;Clostridiaceae;Clostridium_sensu_stricto_16;	0	1	0	0	0	0
Otu1779	1	Bacteria;Proteobacteria;Alphaproteobacteria;Reyranellales;Reyranellaceae;Reyranellaceae_unclassified;	0	1	0	0	0	0
Otu1780	1	Bacteria;Firmicutes;Desulfitobacteriia;Desulfitobacteriales;Syntrophobotulaceae;Syntrophobotulaceae_unclassified;	0	0	1	0	0	0
Otu1781	1	Bacteria;Bacteroidota;Bacteroidia;Bacteroidales;Williamwhitmaniaceae;Acetobacteroides;	0	0	1	0	0	0
Otu1782	1	Bacteria;Proteobacteria;Alphaproteobacteria;Rhodobacterales;Rhodobacteraceae;Falsirhodobacter;	0	0	1	0	0	0
Otu1783	11	Bacteria;Bacteroidota;Bacteroidia;Flavobacteriales;Weeksellaceae;Cloacibacterium;	0	0	7	0	0	0
Otu1784	1	Bacteria;Proteobacteria;Gammaproteobacteria;Methylococcales;Methylomonadaceae;Methylovulum;	0	0	1	0	0	0
Otu1785	1	Bacteria;Proteobacteria;Gammaproteobacteria;Burkholderiales;Comamonadaceae;Zhizhongheella;	0	1	0	0	0	0
Otu1786	1	Bacteria;Proteobacteria;Alphaproteobacteria;Rhizobiales;Rhizobiaceae;Nitratireductor;	0	1	0	0	0	0
Otu1787	1	Bacteria;Proteobacteria;Alphaproteobacteria;Rhodobacterales;Rhodobacteraceae;Thioclava;	0	0	1	0	0	0
Otu1788	1	Bacteria;Firmicutes;Clostridia;Oscillospirales;Butyricicoccaceae;Butyricicoccus;	0	0	1	0	0	0
Otu1789	2	Bacteria;Campilobacterota;Campylobacteria;Campylobacterales;Arcobacteraceae;Pseudarcobacter;	0	0	1	1	0	0
Otu1790	1	Bacteria;Firmicutes;Clostridia;Lachnospirales;Lachnospiraceae;Marvinbryantia;	0	0	1	0	0	0
Otu1791	2	Bacteria;Proteobacteria;Gammaproteobacteria;Burkholderiales;Nitrosomonadaceae;oc32;	1	0	1	0	0	0
Otu1792	1	Bacteria;Actinobacteriota;Actinobacteria;Corynebacteriales;Corynebacteriaceae;Corynebacteriaceae_unclassified;	0	1	0	0	0	0
Otu1793	1	Bacteria;Proteobacteria;Gammaproteobacteria;Burkholderiales;Gallionellaceae;Gallionella;	0	0	1	0	0	0
Otu1794	8	Bacteria;Patescibacteria;Gracilibacteria;JGI_0000069-P22;JGI_0000069-P22_fa;JGI_0000069-P22;	0	0	8	0	0	0
Otu1795	3	Bacteria;Bacteroidota;Bacteroidia;Bacteroidales;Williamwhitmaniaceae;Blvii28_wastewater-sludge_group;	0	0	2	0	0	0
Otu1796	1	Archaea;Thermoplasmatota;Thermoplasmata;uncultured;uncultured_fa;uncultured;	0	0	0	0	0	0
Otu1797	1	Bacteria;Desulfobacterota;Desulfuromonadia;Desulfuromonadia_or;Desulfuromonadaceae;Desulfuromonadaceae_unclassified;	0	0	1	0	0	0
Otu1798	1	Bacteria;Spirochaetota;Spirochaetota_unclassified;Spirochaetota_unclassified;Spirochaetota_unclassified;Spirochaetota_unclassified;	0	1	0	0	0	0
Otu1799	2	Bacteria;Actinobacteriota;Actinobacteria;Micrococcales;Sanguibacteraceae;Sanguibacter;	0	0	2	0	0	0
Otu1800	1	Bacteria;Acidobacteriota;AT-s3-28;AT-s3-28_or;AT-s3-28_fa;AT-s3-28;	0	1	0	0	0	0
Otu1801	1	Bacteria;Planctomycetota;Planctomycetes;Pirellulales;Pirellulaceae;CPla-4_termite_group;	0	0	1	0	0	0
Otu1802	1	Bacteria;Spirochaetota;Spirochaetota_cl;Spirochaetota_or;Spirochaetota_fa;Spirochaetota;	0	0	1	0	0	0
Otu1803	3	Bacteria;Actinobacteriota;Actinobacteria;Streptosporangiales;Streptosporangiaceae;Herbidospora;	0	3	0	0	0	0
Otu1804	6	Bacteria;Firmicutes;Bacilli;Paenibacillales;Paenibacillaceae;Ammoniibacillus;	0	4	0	0	1	0
Otu1805	1	Bacteria;Proteobacteria;Alphaproteobacteria;Rickettsiales;Anaplasmataceae;Candidatus_Xenohaliotis;	0	0	1	0	0	0
Otu1806	1	Bacteria;Verrucomicrobiota;Kiritimatiellae;Kiritimatiellae_unclassified;Kiritimatiellae_unclassified;Kiritimatiellae_unclassified;	0	0	1	0	0	0
Otu1807	1	Bacteria;Bacteroidota;Bacteroidia;Flavobacteriales;Flavobacteriaceae;Zeaxanthinibacter;	0	0	1	0	0	0
Otu1808	1	Bacteria;Actinobacteriota;Actinobacteria;Micromonosporales;Micromonosporaceae;Wangella;	0	1	0	0	0	0
Otu1809	1	Bacteria;Desulfobacterota;Desulfuromonadia;Desulfuromonadia_or;Geopsychrobacteraceae;Desulfuromusa;	0	0	1	0	0	0
Otu1810	1	Bacteria;Planctomycetota;Planctomycetes;Planctomycetales;Gimesiaceae;Gimesia;	0	0	1	0	0	0
Otu1811	1	Bacteria;Proteobacteria;Alphaproteobacteria;Caedibacterales;Caedibacteraceae;Caedibacter;	1	0	0	0	0	0
Otu1812	1	Bacteria;Chloroflexi;Ktedonobacteria;Ktedonobacterales;Ktedonobacteraceae;Thermosporothrix;	0	0	0	0	0	1
Otu1813	1	Bacteria;Bdellovibrionota;Bdellovibrionota_unclassified;Bdellovibrionota_unclassified;Bdellovibrionota_unclassified;Bdellovibrionota_unclassified;	0	0	0	0	0	0
Otu1814	1	Bacteria;Cyanobacteria;Cyanobacteriia;Pseudanabaenales;Pseudanabaenaceae;Pseudanabaenaceae_unclassified;	0	0	0	1	0	0
Otu1815	2	Bacteria;Proteobacteria;Alphaproteobacteria;Elsterales;Elsteraceae;Elsteraceae_unclassified;	0	1	0	0	0	0
Otu1816	1	Bacteria;Desulfobacterota;Desulfomonilia;Desulfomonilales;Desulfomonilaceae;Desulfomonile;	0	0	0	0	0	0
Otu1817	1	Bacteria;Proteobacteria;Gammaproteobacteria;Burkholderiales;Methylophilaceae;Methylotenera;	0	0	1	0	0	0
Otu1818	1	Bacteria;Firmicutes;Clostridia;Peptostreptococcales-Tissierellales;Peptostreptococcales-Tissierellales_fa;Finegoldia;	0	0	1	0	0	0
Otu1819	1	Bacteria;Actinobacteriota;Actinobacteria;Micromonosporales;Micromonosporaceae;Phytomonospora;	0	0	0	0	0	0
Otu1820	1	Bacteria;Bacteroidota;Bacteroidia;Cytophagales;Cyclobacteriaceae;Lunatimonas;	0	0	0	0	0	0
Otu1821	2	Bacteria;Proteobacteria;Gammaproteobacteria;Burkholderiales;Comamonadaceae;Diaphorobacter;	0	0	1	1	0	0
Otu1822	1	Bacteria;Proteobacteria;Gammaproteobacteria;Burkholderiales;Procabacteriaceae;Procabacter;	0	1	0	0	0	0
Otu1823	1	Bacteria;Verrucomicrobiota;Lentisphaeria;Victivallales;Victivallales_unclassified;Victivallales_unclassified;	0	0	1	0	0	0
Otu1824	1	Bacteria;Proteobacteria;Gammaproteobacteria;Burkholderiales;Oxalobacteraceae;Herbaspirillum;	0	0	0	0	1	0
Otu1825	1	Bacteria;Proteobacteria;Gammaproteobacteria;Enterobacterales;Enterobacteriaceae;Salmonella;	0	0	0	0	0	0
Otu1826	1	Bacteria;Firmicutes;Bacilli;Desulfuribacillales;Desulfuribacillaceae;Desulfuribacillus;	0	1	0	0	0	0
Otu1827	1	Bacteria;Firmicutes;Clostridia;Oscillospirales;Oscillospiraceae;Intestinimonas;	0	0	0	0	0	0
Otu1828	1	Bacteria;Actinobacteriota;Actinobacteria;Pseudonocardiales;Pseudonocardiaceae;Actinosynnema;	0	0	0	1	0	0
Otu1829	2	Bacteria;Proteobacteria;Alphaproteobacteria;Rhodospirillales;Magnetospiraceae;Magnetospira;	0	0	0	0	0	0
Otu1830	1	Bacteria;Bacteroidota;Bacteroidia;Cytophagales;Spirosomaceae;Nibrella;	0	0	0	0	0	0
Otu1831	1	Bacteria;Gemmatimonadota;MD2902-B12;MD2902-B12_or;MD2902-B12_fa;MD2902-B12;	0	0	1	0	0	0
Otu1832	1	Bacteria;Verrucomicrobiota;Chlamydiae;Chlamydiales;Criblamydiaceae;uncultured;	0	0	0	0	0	0
Otu1833	1	Bacteria;Proteobacteria;Alphaproteobacteria;Micropepsales;Micropepsaceae;Micropepsaceae;	0	0	1	0	0	0
Otu1834	3	Bacteria;Firmicutes;Clostridia;Oscillospirales;Ruminococcaceae;Anaerotruncus;	1	0	0	0	0	0
Otu1835	1	Bacteria;Myxococcota;Myxococcia;Myxococcales;Myxococcaceae;Melittangium;	1	0	0	0	0	0
Otu1836	1	Bacteria;Actinobacteriota;Actinobacteria;Micrococcales;Microbacteriaceae;Lysinimonas;	0	0	0	0	0	0
Otu1837	1	Bacteria;Bacteroidota;Bacteroidia;Flavobacteriales;Cryomorphaceae;Owenweeksia;	0	0	0	0	1	0
Otu1838	1	Bacteria;Proteobacteria;Gammaproteobacteria;Nitrococcales;Nitrococcaceae;Nitrococcus;	0	0	0	0	1	0
Otu1839	1	Bacteria;Proteobacteria;Gammaproteobacteria;Aeromonadales;Succinivibrionaceae;uncultured;	0	0	0	0	0	0
Otu1840	1	Bacteria;Actinobacteriota;Actinobacteria;Micrococcales;Jonesiaceae;Jonesia;	0	0	1	0	0	0
Otu1841	2	Bacteria;Firmicutes;Bacilli;Bacillales;Planococcaceae;uncultured;	0	0	0	0	2	0
Otu1842	1	Bacteria;Proteobacteria;Alphaproteobacteria;Azospirillales;Azospirillaceae;Niveispirillum;	0	0	0	0	0	0
Otu1843	1	Bacteria;Myxococcota;Polyangia;FFCH16767;FFCH16767_fa;FFCH16767;	0	0	0	0	0	1
Otu1844	1	Bacteria;Firmicutes;Clostridia;Peptostreptococcales-Tissierellales;Peptostreptococcales-Tissierellales_fa;Peptostreptococcales-Tissierellales;	0	0	0	0	0	0
Otu1845	1	Bacteria;Firmicutes;Bacilli;Erysipelotrichales;Erysipelotrichaceae;Bulleidia;	0	0	0	0	0	0
Otu1846	1	Bacteria;Proteobacteria;Alphaproteobacteria;Acetobacterales;Acetobacteraceae;Paracraurococcus;	0	0	0	1	0	0
Otu1847	1	Bacteria;Proteobacteria;Gammaproteobacteria;Pseudomonadales;Pseudomonadaceae;Pseudomonadaceae;	0	0	0	0	0	0
Otu1848	1	Bacteria;Proteobacteria;Gammaproteobacteria;AT-s16;AT-s16_fa;AT-s16;	0	0	0	1	0	0
Otu1849	1	Bacteria;Cyanobacteria;Cyanobacteriia;Cyanobacteriales;Nostocaceae;Fischerella_PCC-9339;	0	0	1	0	0	0
Otu1850	1	Bacteria;Patescibacteria;Saccharimonadia;Saccharimonadales;Saccharimonadaceae;GTL1;	0	0	0	1	0	0
Otu1851	1	Bacteria;Verrucomicrobiota;Verrucomicrobiae;Verrucomicrobiales;Rubritaleaceae;Rubritalea;	0	0	0	0	0	0
Otu1852	2	Bacteria;Proteobacteria;Gammaproteobacteria;uncultured;uncultured_fa;uncultured;	0	0	0	0	2	0
Otu1853	2	Bacteria;Actinobacteriota;Actinobacteria;Micrococcales;Dermacoccaceae;Flexivirga;	0	0	2	0	0	0
Otu1854	1	Bacteria;Firmicutes;Clostridia;Oscillospirales;Ethanoligenenaceae;Ethanoligenenaceae_unclassified;	0	0	0	0	1	0
Otu1855	1	Bacteria;Proteobacteria;Alphaproteobacteria;Holosporales;Holosporaceae;Holosporaceae_unclassified;	0	0	0	0	0	0
Otu1856	1	Bacteria;Actinobacteriota;Actinobacteria;Micromonosporales;Micromonosporaceae;Actinocatenispora;	0	0	0	0	0	0
Otu1857	1	Bacteria;Chloroflexi;Chloroflexia;Chloroflexales;Chloroflexaceae;uncultured;	0	0	0	0	0	0
Otu1858	1	Bacteria;Proteobacteria;Gammaproteobacteria;Enterobacterales;Enterobacteriaceae;Lelliottia;	0	0	0	0	0	1
Otu1859	1	Bacteria;Actinobacteriota;Coriobacteriia;Coriobacteriales;Eggerthellaceae;Gordonibacter;	0	0	0	0	0	0
Otu1860	1	Bacteria;Proteobacteria;Alphaproteobacteria;Rickettsiales;Fokiniaceae;uncultured;	1	0	0	0	0	0
Otu1861	8	Bacteria;Cyanobacteria;Cyanobacteriia;RD011;RD011_fa;RD011;	5	0	0	1	0	0
Otu1862	3	Bacteria;Firmicutes;Bacilli;Paenibacillales;Paenibacillaceae;Paenibacillaceae;	0	0	0	0	0	0
Otu1863	1	Bacteria;Proteobacteria;Gammaproteobacteria;Chromatiales;Chromatiaceae;Thiorhodococcus;	0	0	0	1	0	0
Otu1864	1	Bacteria;Firmicutes;Bacilli;Erysipelotrichales;Erysipelotrichaceae;Erysipelothrix;	0	0	0	0	0	0
Otu1865	1	Bacteria;Bacteroidota;Chlorobia;Chlorobiales;Chlorobiaceae;Chlorobiaceae_unclassified;	0	0	0	1	0	0
Otu1866	1	Bacteria;Proteobacteria;Alphaproteobacteria;Rhizobiales;Methylopilaceae;Methylopilaceae_unclassified;	0	0	0	0	0	0
Otu1867	1	Bacteria;Fusobacteriota;Fusobacteriia;Fusobacteriales;Leptotrichiaceae;Leptotrichia;	0	0	0	0	0	0
Otu1868	1	Bacteria;Cyanobacteria;Cyanobacteriia;Oxyphotobacteria_Incertae_Sedis;Unknown_Family;Pseudanabaena_NgrPSln22;	0	0	0	0	0	0
Otu1869	1	Bacteria;Desulfobacterota;Syntrophobacteria;Syntrophobacterales;Syntrophobacteraceae;uncultured;	0	0	0	0	0	0
Otu1870	1	Bacteria;Bacteroidota;Bacteroidia;Bacteroidales;Dysgonomonadaceae;Dysgonomonadaceae;	0	0	0	1	0	0
Otu1871	1	Bacteria;Proteobacteria;Alphaproteobacteria;Rhizobiales;Pleomorphomonadaceae;Pleomorphomonadaceae;	0	0	0	0	0	0
Otu1872	1	Bacteria;Firmicutes;Clostridia;Oscillospirales;Oscillospiraceae;Papillibacter;	0	0	0	0	1	0
Otu1873	1	Bacteria;Proteobacteria;Alphaproteobacteria;Sneathiellales;Sneathiellaceae;uncultured;	0	0	0	0	0	0
Otu1874	1	Bacteria;Proteobacteria;Gammaproteobacteria;Burkholderiales;Burkholderiaceae;Pandoraea;	0	0	0	0	0	0
Otu1875	1	Bacteria;Proteobacteria;Gammaproteobacteria;Diplorickettsiales;Diplorickettsiaceae;Diplorickettsiaceae;	0	0	0	0	0	0
Otu1876	1	Bacteria;Firmicutes;Bacilli;uncultured;uncultured_fa;uncultured;	0	0	0	0	0	0
Otu1877	4	Bacteria;Proteobacteria;Gammaproteobacteria;Burkholderiales;Rhodocyclaceae;Methyloversatilis;	0	1	0	0	0	0
Otu1878	1	Archaea;Halobacterota;Methanomicrobia;Methanomicrobiales;Methanomicrobiales_unclassified;Methanomicrobiales_unclassified;	0	0	0	0	0	0
Otu1879	1	Bacteria;Firmicutes;Clostridia;Lachnospirales;Lachnospiraceae;Butyrivibrio;	0	0	0	0	0	0
Otu1880	1	Bacteria;Acidobacteriota;Thermoanaerobaculia;Thermoanaerobaculales;Thermoanaerobaculaceae;TPD-58;	0	0	0	1	0	0
Otu1881	1	Bacteria;Firmicutes;Negativicutes;Negativicutes_unclassified;Negativicutes_unclassified;Negativicutes_unclassified;	0	0	0	0	0	0
Otu1882	4	Bacteria;Cyanobacteria;Cyanobacteriia;Oxyphotobacteria_Incertae_Sedis;Unknown_Family;uncultured;	3	0	0	0	0	0
Otu1883	1	Bacteria;Actinobacteriota;Actinobacteria;Micrococcales;Intrasporangiaceae;Intrasporangiaceae;	0	0	0	0	0	0
Otu1884	1	Bacteria;Actinobacteriota;Actinobacteria;Frankiales;Geodermatophilaceae;Antricoccus;	0	0	0	0	0	0
Otu1885	1	Bacteria;Firmicutes;Negativicutes;Veillonellales-Selenomonadales;Selenomonadaceae;Selenomonadaceae_unclassified;	0	0	0	0	0	0
Otu1886	1	Bacteria;Proteobacteria;Gammaproteobacteria;Burkholderiales;Methylophilaceae;uncultured;	1	0	0	0	0	0
Otu1887	1	Bacteria;Actinobacteriota;Actinobacteria;Propionibacteriales;Propionibacteriaceae;Jiangella;	0	0	0	0	1	0
Otu1888	1	Bacteria;Firmicutes;Bacilli;Lactobacillales;Aerococcaceae;Aerococcus;	1	0	0	0	0	0
Otu1889	1	Bacteria;Proteobacteria;Alphaproteobacteria;Caulobacterales;Caulobacteraceae;PMMR1;	0	0	0	0	0	0
Otu1890	1	Bacteria;Planctomycetota;Phycisphaerae;Phycisphaerales;Phycisphaeraceae;Phycisphaeraceae;	0	0	0	0	0	0
Otu1891	1	Bacteria;Acidobacteriota;Acidobacteriae;Acidobacteriae_or;Acidobacteriae_fa;Acidobacteriae_fa_unclassified;	0	0	0	0	0	0
Otu1892	2	Bacteria;Proteobacteria;Alphaproteobacteria;Rickettsiales;bac2nit3;bac2nit3;	0	0	0	0	0	0
Otu1893	1	Bacteria;Myxococcota;Polyangia;MSB-4B10;MSB-4B10_fa;MSB-4B10;	0	0	0	0	0	0
Otu1894	1	Bacteria;Chloroflexi;Chloroflexia;Chloroflexales;Roseiflexaceae;Kouleothrix;	0	0	0	0	0	0
Otu1895	1	Bacteria;Actinobacteriota;Acidimicrobiia;Microtrichales;Microtrichaceae;Sva0996_marine_group;	0	0	0	0	0	0
Otu1896	1	Bacteria;Firmicutes;Bacilli;Staphylococcales;Staphylococcaceae;Aliicoccus;	0	0	0	0	0	0
Otu1897	1	Bacteria;Bdellovibrionota;Oligoflexia;Silvanigrellales;Silvanigrellaceae;uncultured;	0	0	0	0	0	0
Otu1898	1	Bacteria;Firmicutes;TSAC18;TSAC18_or;TSAC18_fa;TSAC18;	0	0	0	1	0	0
Otu1899	1	Bacteria;Myxococcota;Polyangia;Polyangiales;Polyangiaceae;Byssovorax;	0	0	0	1	0	0
Otu1900	1	Bacteria;Campilobacterota;Campylobacteria;Campylobacterales;Arcobacteraceae;Arcobacteraceae_unclassified;	0	0	0	0	0	0
Otu1901	1	Bacteria;Proteobacteria;Gammaproteobacteria;Burkholderiales;Comamonadaceae;Caenimonas;	0	0	0	1	0	0
Otu1902	2	Bacteria;Firmicutes;Bacilli;Lactobacillales;Carnobacteriaceae;Trichococcus;	0	0	0	0	0	0
Otu1903	1	Bacteria;Actinobacteriota;Actinobacteria;Streptosporangiales;Nocardiopsaceae;Nocardiopsaceae_unclassified;	0	0	0	0	0	0
Otu1904	1	Bacteria;Firmicutes;Bacilli;Lactobacillales;Carnobacteriaceae;Atopostipes;	0	0	0	1	0	0
Otu1905	1	Archaea;Crenarchaeota;Nitrososphaeria;Nitrososphaeria_unclassified;Nitrososphaeria_unclassified;Nitrososphaeria_unclassified;	0	0	0	0	0	0
Otu1906	1	Bacteria;Patescibacteria;Parcubacteria;Candidatus_Doudnabacteria;Candidatus_Doudnabacteria_fa;Candidatus_Doudnabacteria;	0	0	0	0	0	0
Otu1907	1	Bacteria;Acidobacteriota;Blastocatellia;Pyrinomonadales;Pyrinomonadaceae;Pyrinomonas;	0	0	0	1	0	0
Otu1908	9	Bacteria;Bacteroidota;Bacteroidia;Cytophagales;Hymenobacteraceae;Nibribacter;	1	5	0	0	2	0
Otu1909	1	Bacteria;Firmicutes;Bacilli;Paenibacillales;Paenibacillaceae;uncultured;	0	0	0	0	0	0
Otu1910	1	Bacteria;Firmicutes;Bacilli;Izemoplasmatales;Izemoplasmatales_unclassified;Izemoplasmatales_unclassified;	0	0	0	1	0	0
Otu1911	1	Bacteria;Proteobacteria;Alphaproteobacteria;Rhizobiales;Rhizobiales_Incertae_Sedis;Anderseniella;	0	0	0	0	0	0
Otu1912	2	Bacteria;Cyanobacteria;Cyanobacteriia;Cyanobacteriales;Xenococcaceae;Pleurocapsa_PCC-7319;	0	0	0	2	0	0
Otu1913	1	Bacteria;Verrucomicrobiota;Chlamydiae;Chlamydiales;Parachlamydiaceae;Candidatus_Rubidus;	0	0	0	0	0	0
Otu1914	3	Bacteria;Proteobacteria;Gammaproteobacteria;Alteromonadales;Marinobacteraceae;Marinobacter;	0	0	0	0	0	0
Otu1915	1	Bacteria;Actinobacteriota;Actinobacteria;Micrococcales;Cellulomonadaceae;Sediminihabitans;	0	0	0	0	1	0
Otu1916	1	Bacteria;Firmicutes;Bacilli;Izemoplasmatales;Izemoplasmataceae;Izemoplasmataceae;	0	0	0	0	0	0
Otu1917	2	Bacteria;Firmicutes;Clostridia;Oscillospirales;Butyricicoccaceae;UCG-009;	0	0	1	0	0	1
Otu1918	1	Bacteria;Proteobacteria;Gammaproteobacteria;Ectothiorhodospirales;Ectothiorhodospiraceae;uncultured;	0	0	0	0	1	0
Otu1919	1	Bacteria;Myxococcota;Polyangia;UASB-TL25;UASB-TL25_fa;UASB-TL25;	0	0	0	0	1	0
Otu1920	2	Bacteria;Firmicutes;Clostridia;Eubacteriales;Alkalibacteraceae;Alkalibacter;	0	0	0	1	0	0
Otu1921	1	Bacteria;Acidobacteriota;Acidobacteriae;Acidobacteriae_or;Acidobacteriae_fa;Acidobacteriae;	0	0	0	0	0	0
Otu1922	1	Bacteria;Firmicutes;Clostridia;Lachnospirales;Lachnospiraceae;Syntrophococcus;	0	0	0	0	1	0
Otu1923	1	Bacteria;Proteobacteria;Gammaproteobacteria;Oceanospirillales;Oceanospirillales_unclassified;Oceanospirillales_unclassified;	0	0	0	0	0	1
Otu1924	1	Bacteria;Calditrichota;Calditrichia;Calditrichales;Calditrichaceae;Calditrichaceae;	0	0	0	1	0	0
Otu1925	1	Archaea;Halobacterota;Methanosarcinia;Methanosarciniales;Methanoperedenaceae;Candidatus_Methanoperedens;	0	0	0	1	0	0
Otu1926	6	Bacteria;Bacteroidota;Ignavibacteria;Ignavibacteriales;Ignavibacteriales_fa;Ignavibacteriales;	0	0	2	0	0	0
Otu1927	1	Bacteria;Firmicutes;Clostridia;Clostridiales;Clostridiaceae;Hathewaya;	0	0	0	1	0	0
Otu1928	1	Bacteria;Patescibacteria;Microgenomatia;Candidatus_Roizmanbacteria;Candidatus_Roizmanbacteria_fa;Candidatus_Roizmanbacteria;	0	0	0	0	1	0
Otu1929	1	Bacteria;Bdellovibrionota;Oligoflexia;Oligoflexales;Oligoflexales_fa;Oligoflexales;	0	0	0	0	1	0
Otu1930	1	Bacteria;Desulfobacterota;Desulfuromonadia;Desulfuromonadia_or;Geothermobacteraceae;Geothermobacter;	0	0	0	0	0	0
Otu1931	1	Bacteria;Planctomycetota;Phycisphaerae;C86;C86_fa;C86;	0	0	0	0	0	1
Otu1932	1	Bacteria;Proteobacteria;Alphaproteobacteria;Sphingomonadales;Sphingomonadaceae;Sphingorhabdus;	0	0	0	0	0	1
Otu1933	5	Bacteria;Proteobacteria;Gammaproteobacteria;Vibrionales;Vibrionaceae;Photobacterium;	0	0	0	0	5	0
Otu1934	10	Bacteria;Proteobacteria;Gammaproteobacteria;Xanthomonadales;Xanthomonadaceae;Xanthomonas;	0	4	0	0	0	0
Otu1935	1	Bacteria;Bacteroidota;Bacteroidia;Chitinophagales;Chitinophagaceae;UTBCD1;	0	0	0	0	1	0
Otu1936	1	Bacteria;Firmicutes;Negativicutes;Veillonellales-Selenomonadales;Veillonellaceae;Veillonellaceae_unclassified;	0	0	0	0	0	0
Otu1937	3	Bacteria;Proteobacteria;Gammaproteobacteria;Burkholderiales;Oxalobacteraceae;Undibacterium;	0	0	0	0	3	0
Otu1938	1	Bacteria;Desulfobacterota;Desulfobaccia;Desulfobaccales;Desulfobaccaceae;Desulfobacca;	0	0	0	1	0	0
Otu1939	1	Bacteria;Firmicutes;Thermovenabulia;Thermovenabulales;Thermovenabulales_fa;Tepidanaerobacter;	0	0	0	0	0	0
Otu1940	1	Bacteria;Firmicutes;Desulfotomaculia;Desulfotomaculales;Desulfotomaculales_fa;Desulfohalotomaculum;	0	0	0	0	0	0
Otu1941	1	Bacteria;Actinobacteriota;Actinobacteria;Glycomycetales;Glycomycetaceae;Glycomycetaceae_unclassified;	0	0	0	0	0	0
Otu1942	1	Bacteria;Cyanobacteria;Cyanobacteriia;Leptolyngbyales;Leptolyngbyaceae;Leptolyngbyaceae;	0	0	0	0	0	0
Otu1943	1	Bacteria;Proteobacteria;Gammaproteobacteria;HOC36;HOC36_fa;HOC36;	0	0	0	0	0	0
Otu1944	1	Bacteria;Proteobacteria;Alphaproteobacteria;Sphingomonadales;Sphingomonadaceae;Sphingomonadaceae;	0	0	0	0	0	0
Otu1945	1	Bacteria;Firmicutes;Clostridia;Lachnospirales;Lachnospiraceae;Lactonifactor;	0	0	0	0	0	0
Otu1946	1	Bacteria;Firmicutes;Clostridia;Clostridia_or;Hungateiclostridiaceae;Saccharofermentans;	0	0	0	1	0	0
Otu1947	1	Bacteria;Proteobacteria;Alphaproteobacteria;Rhizobiales;Devosiaceae;Cucumibacter;	0	0	0	0	0	0
Otu1948	2	Bacteria;Firmicutes;Clostridia;Peptostreptococcales-Tissierellales;Thermotaleaceae;Crassaminicella;	2	0	0	0	0	0
Otu1949	1	Bacteria;Bacteroidota;Bacteroidia;Bacteroidales;CAP-aah99b04;CAP-aah99b04;	0	0	0	0	0	0
Otu1950	1	Bacteria;Actinobacteriota;Actinobacteria;Micrococcales;Brevibacteriaceae;Brevibacteriaceae_unclassified;	0	0	0	1	0	0
Otu1951	1	Archaea;Thermoplasmatota;Thermoplasmatota_unclassified;Thermoplasmatota_unclassified;Thermoplasmatota_unclassified;Thermoplasmatota_unclassified;	0	0	0	0	1	0
Otu1952	1	Bacteria;Cyanobacteria;Cyanobacteriia;Cyanobacteriales;Nostocaceae;Tolypothrix;	0	0	0	0	0	0
Otu1953	1	Bacteria;Proteobacteria;Gammaproteobacteria;Xanthomonadales;Rhodanobacteraceae;Frateuria;	0	0	0	0	0	0
Otu1954	1	Bacteria;Firmicutes;Bacilli;Thermoactinomycetales;Thermoactinomycetaceae;Pasteuria;	0	0	0	0	0	1
Otu1955	1	Bacteria;Proteobacteria;Alphaproteobacteria;Rickettsiales;Rickettsiaceae;Rickettsiaceae;	0	0	0	0	0	0
Otu1956	1	Bacteria;Chloroflexi;Chloroflexia;Chloroflexales;Chloroflexaceae;Oscillochloris;	0	0	0	0	0	0
Otu1957	1	Bacteria;Cyanobacteria;Cyanobacteriia;Cyanobacteriales;Xenococcaceae;Stanieria_PCC-7437;	0	0	0	0	0	0
Otu1958	1	Bacteria;Actinobacteriota;Coriobacteriia;Coriobacteriales;Coriobacteriales_Incertae_Sedis;Raoultibacter;	0	0	0	0	1	0
Otu1959	1	Bacteria;Actinobacteriota;Actinobacteria;Propionibacteriales;Propionibacteriaceae;uncultured;	0	0	0	0	1	0
Otu1960	1	Bacteria;Proteobacteria;Gammaproteobacteria;EV818SWSAP88;EV818SWSAP88_fa;EV818SWSAP88;	1	0	0	0	0	0
Otu1961	1	Bacteria;Proteobacteria;Gammaproteobacteria;Burkholderiales;Sutterellaceae;Parasutterella;	1	0	0	0	0	0
Otu1962	1	Bacteria;Proteobacteria;Gammaproteobacteria;Aeromonadales;Succinivibrionaceae;Succinivibrionaceae_unclassified;	0	0	0	0	0	0
Otu1963	1	Bacteria;Proteobacteria;Alphaproteobacteria;Kiloniellales;Kiloniellaceae;Kiloniellaceae_unclassified;	0	0	0	1	0	0
Otu1964	1	Bacteria;Verrucomicrobiota;Omnitrophia;Omnitrophales;Omnitrophales_fa;Omnitrophales;	0	0	0	0	1	0
Otu1965	1	Bacteria;Desulfobacterota;Desulfobulbia;Desulfobulbales;Desulfurivibrionaceae;MSBL7;	0	0	0	0	1	0
Otu1966	1	Bacteria;Proteobacteria;Gammaproteobacteria;BD72BR169;BD72BR169_fa;BD72BR169;	0	0	0	0	0	0
Otu1967	1	Bacteria;Cyanobacteria;Cyanobacteriia;Cyanobacteriales;Nostocaceae;Scytonema_VB-61278;	0	0	0	1	0	0
Otu1968	1	Archaea;Halobacterota;Methanomicrobia;Methanomicrobiales;Methanomicrobiaceae;Methanomicrobiaceae;	0	0	0	0	0	0
Otu1969	1	Bacteria;Verrucomicrobiota;Verrucomicrobiae;Opitutales;Opitutaceae;Ereboglobus;	0	0	0	0	0	0
Otu1970	1	Bacteria;Actinobacteriota;Actinobacteria;Streptosporangiales;Nocardiopsaceae;Nocardiopsis;	0	0	0	0	0	0
Otu1971	1	Bacteria;Fusobacteriota;Fusobacteriia;Fusobacteriales;Fusobacteriaceae;Cetobacterium;	0	0	0	0	0	0
Otu1972	1	Bacteria;Actinobacteriota;Actinobacteria;Streptosporangiales;Streptosporangiaceae;Streptosporangiaceae;	0	0	0	0	0	0
Otu1973	1	Bacteria;Actinobacteriota;Actinobacteria;Micromonosporales;Micromonosporaceae;Rhizocola;	0	0	0	0	0	0
Otu1974	3	Bacteria;Bacteroidota;Bacteroidia;Bacteroidales;Prevotellaceae;Prevotellaceae_Ga6A1_group;	0	1	0	0	2	0
Otu1975	1	Bacteria;Campilobacterota;Campylobacteria;Campylobacterales;Arcobacteraceae;uncultured;	0	0	0	1	0	0
Otu1976	1	Bacteria;Proteobacteria;Gammaproteobacteria;Burkholderiales;Comamonadaceae;Limnohabitans;	0	0	0	0	1	0
Otu1977	1	Bacteria;Proteobacteria;Alphaproteobacteria;Rhizobiales;Pleomorphomonadaceae;uncultured;	0	0	0	1	0	0
Otu1978	1	Bacteria;Proteobacteria;Alphaproteobacteria;Caulobacterales;Hyphomonadaceae;UKL13-1;	0	0	0	0	0	0
Otu1979	1	Bacteria;Actinobacteriota;Actinobacteria;Micromonosporales;Micromonosporaceae;Stackebrandtia;	0	0	0	0	0	0
Otu1980	1	Bacteria;Actinobacteriota;Actinobacteria;Micrococcales;Intrasporangiaceae;Ornithinicoccus;	0	0	0	0	0	0
Otu1981	1	Bacteria;Fusobacteriota;Fusobacteriia;Fusobacteriales;Fusobacteriaceae;Fusobacteriaceae_unclassified;	0	0	0	0	0	0
Otu1982	1	Bacteria;Chloroflexi;Anaerolineae;Anaerolineales;Anaerolineaceae;Bellilinea;	0	0	0	0	0	0
Otu1983	1	Bacteria;Proteobacteria;Alphaproteobacteria;Micavibrionales;Micavibrionaceae;Micavibrio;	1	0	0	0	0	0
Otu1984	1	Bacteria;Proteobacteria;Gammaproteobacteria;Burkholderiales;Oxalobacteraceae;Paraherbaspirillum;	0	0	0	0	0	0
Otu1985	1	Bacteria;Verrucomicrobiota;Kiritimatiellae;Kiritimatiellales;Kiritimatiellaceae;MSBL3;	0	0	0	0	0	0
Otu1986	1	Bacteria;Planctomycetota;ODP123;ODP123_or;ODP123_fa;ODP123;	1	0	0	0	0	0
Otu1987	1	Bacteria;Proteobacteria;Alphaproteobacteria;Holosporales;Holosporaceae;Candidatus_Bealeia;	0	0	0	0	0	0
Otu1988	1	Bacteria;Proteobacteria;Alphaproteobacteria;Azospirillales;Azospirillales_unclassified;Azospirillales_unclassified;	0	0	0	0	0	0
Otu1989	2	Bacteria;Actinobacteriota;Actinobacteria;Propionibacteriales;Propionibacteriaceae;Aestuariimicrobium;	2	0	0	0	0	0
Otu1990	1	Bacteria;Actinobacteriota;Actinobacteria;Corynebacteriales;Corynebacteriaceae;Lawsonella;	0	0	0	0	0	0
Otu1991	1	Bacteria;Proteobacteria;Gammaproteobacteria;Salinisphaerales;Solimonadaceae;Hydrocarboniphaga;	0	0	0	0	0	0
Otu1992	1	Bacteria;Proteobacteria;Alphaproteobacteria;Rickettsiales;Rickettsiales_fa;Rickettsiales_fa_unclassified;	0	0	0	0	0	0
Otu1993	1	Bacteria;Bacteroidota;Bacteroidia;Chitinophagales;Chitinophagaceae;Aurantisolimonas;	0	0	0	0	0	0
Otu1994	1	Bacteria;Proteobacteria;Alphaproteobacteria;Rhizobiales;Xanthobacteraceae;Starkeya;	0	0	0	0	1	0
Otu1995	1	Bacteria;Nitrospirota;4-29-1;4-29-1_or;4-29-1_fa;4-29-1;	0	0	0	0	1	0
Otu1996	1	Bacteria;Proteobacteria;Gammaproteobacteria;Burkholderiales;Burkholderiaceae;Mycoavidus;	1	0	0	0	0	0
Otu1997	1	Bacteria;Actinobacteriota;Actinobacteria;Micrococcales;Micrococcaceae;Enteractinococcus;	0	0	0	0	0	0
Otu1998	1	Bacteria;Firmicutes;Bacilli;Bacillales;Bacillaceae;Terribacillus;	0	0	0	0	0	0
Otu1999	1	Bacteria;Actinobacteriota;Actinobacteria;Micrococcales;Intrasporangiaceae;Kribbia;	0	0	0	0	0	0
[truncated: 66 more rows]
