# Supplementary material for: A multi-omics-based insight to decipher the nano-calcium induced enhanced chickpea (Cicer arietinum) productivity under acidic soil conditions
Source: Research Square preprint supplement (doi:10.21203/rs.3.rs-7170968/v1), 2025-09-12
Supplement: Supplementary file 2 [file 96af6e91fc95c938075bbe5e.docx]

**Supplementary Table 2**: Phylum-wise Distribution of Bacteria in the Rhizosphere of Chickpea

| **Sr. No** | **Kingdom** | **Phyla** | **NC_B** | **NC_A** | **PC_A** | **Nano1/50_A** | **Nano1/100_A** | **Nano1/150_A** | **Total** |
| --- | --- | --- | --- | --- | --- | --- | --- | --- | --- |
|  | Bacteria | Proteobacteria | 9681 | 14422 | 13912 | 11170 | 13765 | 9087 | 72037 |
|  | Bacteria | Actinobacteriota | 5037 | 8077 | 5955 | 4589 | 4771 | 6071 | 34500 |
|  | Bacteria | Bacteroidota | 4228 | 3426 | 5241 | 4986 | 5372 | 598 | 23851 |
|  | Bacteria | Planctomycetota | 3077 | 4921 | 5036 | 6400 | 2753 | 4998 | 27185 |
|  | Bacteria | Chloroflexi | 3886 | 5137 | 4703 | 4189 | 3375 | 4321 | 25611 |
|  | Bacteria | Firmicutes | 2280 | 2517 | 2765 | 1660 | 2807 | 1175 | 13204 |
|  | Bacteria | Acidobacteriota | 2043 | 2480 | 1879 | 1762 | 2266 | 1513 | 11943 |
|  | Bacteria | Myxococcota | 918 | 1344 | 1550 | 1190 | 1061 | 600 | 6663 |
|  | Bacteria | Verrucomicrobiota | 889 | 1040 | 1079 | 1263 | 716 | 191 | 5178 |
|  | Bacteria | Patescibacteria | 643 | 652 | 1456 | 941 | 498 | 427 | 4617 |
|  | Bacteria | Gemmatimonadota | 390 | 464 | 526 | 282 | 317 | 458 | 2437 |
|  | Archaea | Halobacterota | 114 | 196 | 372 | 520 | 129 | 26 | 1357 |
|  | Bacteria | Cyanobacteria | 558 | 141 | 116 | 484 | 181 | 143 | 1623 |
|  | Bacteria | Bdellovibrionota | 252 | 205 | 354 | 203 | 203 | 72 | 1289 |
|  | Bacteria | Dependentiae | 211 | 262 | 333 | 192 | 160 | 25 | 1183 |
|  | Bacteria | Desulfobacterota | 100 | 162 | 402 | 198 | 206 | 50 | 1118 |
|  | Bacteria | Fibrobacterota | 123 | 136 | 226 | 182 | 167 | 17 | 851 |
|  | Archaea | Euryarchaeota | 70 | 65 | 158 | 170 | 51 | 4 | 518 |
|  | Bacteria | Armatimonadota | 154 | 125 | 86 | 78 | 200 | 65 | 708 |
|  | Bacteria | Spirochaetota | 38 | 38 | 158 | 52 | 143 | 10 | 439 |
|  | Bacteria | Nitrospirota | 106 | 91 | 112 | 71 | 63 | 31 | 474 |
|  | Bacteria | WPS-2 | 82 | 47 | 49 | 69 | 142 | 205 | 594 |
|  | Bacteria | NB1-j | 37 | 75 | 67 | 48 | 35 | 61 | 323 |
|  | Archaea | Crenarchaeota | 24 | 21 | 49 | 48 | 12 | 37 | 191 |
|  | Bacteria | Latescibacterota | 11 | 12 | 183 | 26 | 26 | 13 | 271 |
|  | Bacteria | Hydrogenedentes | 11 | 14 | 77 | 33 | 30 | 11 | 176 |
|  | Bacteria | Elusimicrobiota | 21 | 30 | 18 | 30 | 33 | 6 | 138 |
|  | Bacteria | Deinococcota | 23 | 15 | 42 | 20 | 11 | 54 | 165 |
|  | Bacteria | Sumerlaeota | 7 | 18 | 40 | 23 | 10 | 3 | 101 |
|  | Bacteria | Cloacimonadota | 0 | 0 | 50 | 7 | 1 | 0 | 58 |
|  | Bacteria | Synergistota | 0 | 3 | 40 | 6 | 9 | 0 | 58 |
|  | Bacteria | MBNT15 | 13 | 24 | 13 | 9 | 6 | 11 | 76 |
|  | Archaea | Nanoarchaeota | 3 | 2 | 14 | 23 | 7 | 1 | 50 |
|  | Bacteria | Abditibacteriota | 4 | 9 | 5 | 12 | 4 | 2 | 36 |
|  | Bacteria | WS2 | 4 | 6 | 21 | 12 | 0 | 5 | 48 |
|  | Bacteria | Dadabacteria | 4 | 4 | 13 | 5 | 9 | 8 | 43 |
|  | Archaea | Thermoplasmatota | 7 | 4 | 3 | 10 | 2 | 0 | 26 |
|  | Bacteria | RCP2-54 | 12 | 4 | 6 | 5 | 6 | 4 | 37 |
|  | Bacteria | Sva0485 | 2 | 4 | 12 | 10 | 7 | 0 | 35 |
|  | Bacteria | Zixibacteria | 6 | 3 | 8 | 4 | 6 | 3 | 30 |
|  | Bacteria | Campilobacterota | 4 | 4 | 6 | 9 | 8 | 1 | 32 |
|  | Bacteria | Entotheonellaeota | 6 | 15 | 2 | 5 | 7 | 4 | 39 |
|  | Bacteria | SAR324_clade  (Marine_group_B) | 7 | 5 | 8 | 3 | 0 | 0 | 23 |
|  | Bacteria | Methylomirabilota | 1 | 4 | 7 | 3 | 5 | 4 | 24 |
|  | Bacteria | Halanaerobiaeota | 6 | 10 | 8 | 3 | 0 | 4 | 31 |
|  | Bacteria | Caldatribacteriota | 0 | 0 | 6 | 3 | 0 | 0 | 9 |
|  | Bacteria | FCPU426 | 1 | 1 | 2 | 2 | 1 | 0 | 7 |
|  | Bacteria | GAL15 | 0 | 2 | 3 | 2 | 1 | 7 | 15 |
|  | Bacteria | Modulibacteria | 0 | 0 | 3 | 0 | 0 | 0 | 3 |
|  | Bacteria | WS4 | 2 | 2 | 1 | 0 | 1 | 3 | 9 |
|  | Bacteria | Thermotogota | 0 | 0 | 0 | 1 | 0 | 0 | 1 |
|  | Bacteria | uncultured | 0 | 0 | 1 | 1 | 0 | 0 | 2 |
|  | Bacteria | Fermentibacterota | 0 | 0 | 1 | 0 | 0 | 0 | 1 |
|  | Bacteria | Fusobacteriota | 1 | 0 | 0 | 0 | 0 | 0 | 1 |
|  | Bacteria | DTB120 | 0 | 0 | 1 | 0 | 0 | 0 | 1 |
|  | Bacteria | Calditrichota | 0 | 0 | 0 | 1 | 0 | 0 | 1 |
|  | Bacteria | Margulisbacteria | 0 | 0 | 0 | 0 | 0 | 0 | 0 |

NC_B – Control without application of Ca++ and before sowing of Chickpea, NC_A – Negative control 15 days After sowing, PC_A - Positive control 15 days, Nano1/50_A - Nano1/50 15 day, Nano1/100_A - Nano1/100 15 day, Nano1/150_A - Nano1/150 15 day.
