# Supplementary material for: A multi-omics-based insight to decipher the nano-calcium induced enhanced chickpea (Cicer arietinum) productivity under acidic soil conditions
Source: Research Square preprint supplement (doi:10.21203/rs.3.rs-7170968/v1), 2025-09-12
Supplement: Supplementary file 3 [file a7d53c370113773665127508.docx]

**Supplementary 1: Details of calcium responsive genes primers**

| Sr.no. | Name of Primer | Forward Primer  (5’- 3’) | Reverse Primer  (3’- 5’) |
| --- | --- | --- | --- |
| 1 | *CAMTA2-X1* | ATGAATGTGGGCATGTGATAGA | CAGTGTCTGAGCCAGCATAA |
| 2 | *ATPase 8* | GCTGTGGTTGGGAAATTGATAC | GGAAGTCTCAGGTTCCTTCTTT |
| 3 | *CBL 4-X2* | GGTTATGAGGATCCCACTGTTC | GCCTCTACTTCACTCACAGTAAC |
| 4 | *MBP3-X1* | TCTGCTCCTATGAGTCCTACAC | CTTGGAGGGTGGTTGTTCTATG |
| 5 | *TTOP12-X2* | TGGTTGCAGCCTACGTATAATC | CCAAAGGTTGTCTAGTCCTTCTC |
