# Supplementary material for: A multi-omics-based insight to decipher the nano-calcium induced enhanced chickpea (Cicer arietinum) productivity under acidic soil conditions
Source: Research Square preprint supplement (doi:10.21203/rs.3.rs-7170968/v1), 2025-09-12
Supplement: Supplementary file 4 [file dce62f5ebf27bdda78fae974.docx]

**Supplementary Table 5**: Respective functions of calcium responsive DEGs based on annotation which plays important role in growth and development of the chickpea plants

| **S. No.** | **Trinity ID** | **Name of Protein** | **Functions** | **References** |
| --- | --- | --- | --- | --- |
| 1 | DN3990_c0_g1_i7 | calmodulin-binding transcription activator | CAMTA transcription factors are essential for calcium/calmodulin transduction signaling pathways and CAMTA-mediated gene transcription control. | *(Ali et al., 2020*) |
| 2 | DN226541_c0_g1_i1 | calcium/calmodulin-dependent protein kinase cmkA-like | CaMKII's autoregulation, isoenzymic nature, and subcellular localization all influence the enzyme's function in Ca2+ signal transduction. | (Hudman et al., 2002) |
| 3 | DN27840_c0_g1_i1 | calcium/calmodulin-dependent protein kinase cmkB-like | Activates in the calcium-triggered CaMKK-CaMK1 signaling cascade and is a calcium/calmodulin-dependent protein kinase, contributes significantly to the process of converting intracellular Ca2+ signals into a range of downstream targets | (Hudman et al., 2002) |
| 4 | DN2073_c0_g2_i3 | calmodulin-binding protein 60 B-like | Major transcription factors that control a large number of defense-related genes in plant immunity | (Huang et al., 2021) |
| 5 | DN230951_c0_g1_i1 | vacuolar calcium ion transporter-like | Plant cells' Ca2+ signaling may be influenced by vacuolar Ca2+ channels and Ca2+ pumps. | (Schönknecht , 2013) |
| 6 | DN9703_c0_g1_i2 | calcium uniporter protein 2 | Develops a functional Ca2+-permeable channel | (Teardo et al, 2017) |
| 7 | DN122126_c0_g1_i1 | calcium-dependent protein kinase 29 like | Calcium-dependent protein kinase 29 (CPK29) phosphorylates certain target residues on the PIN-HL that aren't phosphorylated by other kinases. | (Lee et al, 2021) |
| 8 | DN20047_c0_g1_i1 | calcium permeable stress-gated cation channel 1 | Carries out the function of an osmosensitive calcium-permeable cation channel. | (Hou et al., 2014) |
| 9 | DN7772_c0_g1_i1 | S-type anion channel SLAH1-like | Anion homeostasis is maintained via a slow, weak voltage-dependent S-type anion efflux channel.. | (Takashi et al.,2015), |
| 10 | DN10688_c0_g1_i2 | potassium transporter- 5 | Calcium sensorsmediate potassium absorption via High-affinity potassium transporterby plant rootsduring seedling establishment and post germination development in response to low potassium. | (Ragel et al, 2015) |
| 11 | DN92236_c0_g1_i1 | superoxide-generating NADPH oxidase heavy chain subunit A-like | Membrane-bound oxidase responsible to generates superoxide | (Sumimoto et al, 2008) |
| 12 | DN77218_c0_g1_i1 | superoxide-generating NADPH oxidase heavy chain subunit A-like | Membrane-bound oxidase responsible to generates superoxide | (Sumimoto et al, 2008) |
| 13 | DN198321_c0_g1_i1 | superoxide-generating NADPH oxidase heavy chain subunit A-like | Membrane-bound oxidase responsible to generates superoxide | (Sumimoto et al, 2008) |
| 14 | DN16492_c0_g1_i2 | phospholipase D alpha 4 | Plays a part in nitrogen signalling and growth promotion. | (Hong et al, 2009) |
| 15 | DN225903_c0_g1_i1 | calreticulin- like | Calreticulin/Calnexin cycle-mediated promotion of folding, oligomeric assembly, and quality control by a molecular calcium-binding chaperone in the ER | (Nelson et al, 1997) |
| 16 | DN11397_c0_g1_i1 | calreticulin- like | Calreticulin/Calnexin cycle-mediated promotion of folding, oligomeric assembly, and quality control by a molecular calcium-binding chaperone in the ER | (Nelson et al, 1997) |
| 17 | DN10682_c0_g1_i2 | calreticulin- like | Calreticulin/Calnexin cycle-mediated promotion of folding, oligomeric assembly, and quality control by a molecular calcium-binding chaperone in the ER | (Nelson et al, 1997) |
| 18 | DN225903_c0_g1_i1 | calreticulin- like | Promote folding, oligomeric assembly of calcium-binding chaperone | (Venkatesan et al, 2021) |
| 19 | DN17498_c0_g1_i3 | NAC domain-containing protein 76 | Helps in development of the xylem by enhancing the expression of transcription factors, which promotes secondary wall production. causes the secondary walls to thicken | (Zhou et al, 2014) |
| 20 | DN17017_c0_g1_i2 | NAC transcription factor 32 | Promotes the generation of reactive oxygen species (ROS), controls auxin-mediated responses favorably in roots, NAC transcription factor that responds to stress and participates in ABA-induced leaf senescence signalling essential to ensure proper seed shape and growth | (Kunieda et al, 2008), (Takashi et al.,2015), (Mahmood et al., 2016) |
| 21 | DN5351_c0_g4_i1 | NAC domain-containing protein 7 | Promotes the expression of transcription factors connected to secondary walls, as well as genes involved in secondary wall biosynthesis and programmed cell death, all of which are controlled by the secondary wall NAC binding element. Also helps in development of xylem | (Ooka et al., 2003) |
