# Supplementary material for: A multi-omics-based insight to decipher the nano-calcium induced enhanced chickpea (Cicer arietinum) productivity under acidic soil conditions
Source: Research Square preprint supplement (doi:10.21203/rs.3.rs-7170968/v1), 2025-09-12
Supplement: Supplementary file 5 [file e0c727be18c1ecb7d2a590d6.xlsx]

## Sheet: Sheet1
Supplementary Table S4: Table of Operational Taxonomic Units at the genus level illustrating the relative abundance across the treatment and control groups.
	CB	NC_A	PC_A	N50_A	N100_A	N150_A
Massilia	1339	1241	241	414	1392	844
Pir4_lineage	361	789	910	1069	376	447
Sphingomonas	666	691	318	491	729	545
Nocardioides	703	807	459	446	375	631
Ruminofilibacter	16	26	225	85	1472	9
Bryobacter	308	342	282	300	360	200
Allorhizobium-Neorhizobium-Pararhizobium-Rhizobium	113	232	191	165	917	94
Flavobacterium	622	216	404	339	108	20
Pirellula	238	306	334	466	140	214
Vicinamibacteraceae	293	570	254	196	162	181
Mycobacterium	182	285	244	163	269	488
Romboutsia	221	329	231	220	392	216
Sphingobacterium	469	289	128	392	295	24
Chryseolinea	217	334	375	359	150	143
Acidibacter	177	373	328	240	257	127
Bacteroidetes_vadinHA17	49	36	809	296	302	7
Anaerolinea	201	194	330	339	237	125
Steroidobacter	178	381	257	282	180	68
BIrii41	164	308	250	271	169	127
Ralstonia	23	154	77	72	877	54
SBR1031	162	213	338	133	288	122
WD2101_soil_group	210	182	167	270	118	257
Pseudoxanthomonas	285	331	195	197	122	40
Planctomicrobium	89	182	240	260	88	226
Ilumatobacter	67	324	302	204	76	100
Conexibacter	176	224	211	109	233	111
Pedomicrobium	176	244	159	120	140	211
Terrimonas	197	240	218	229	135	27
Devosia	93	269	212	186	133	127
Marmoricola	247	214	89	108	93	264
Bradyrhizobium	144	170	117	123	279	158
Haliangium	95	206	311	141	130	84
Bacillus	287	193	90	95	254	30
Clostridium_sensu_stricto_1	167	143	143	111	254	114
Candidatus_Solibacter	172	171	137	159	206	68
Hyphomicrobium	123	202	168	122	117	163
Reyranella	67	200	109	153	233	93
Saccharimonadales	121	105	218	144	98	138
Pseudomonas	118	100	214	143	169	79
SWB02	91	174	174	189	103	91
LWQ8	144	171	143	181	84	89
Streptomyces	191	142	147	87	135	99
Luteimonas	101	141	232	121	139	54
IMCC26256	94	218	133	86	132	121
Terrabacter	95	159	50	54	131	291
Acidothermus	105	93	60	109	204	182
Ohtaekwangia	74	150	154	295	55	24
Flavisolibacter	377	125	43	93	62	17
Gemmata	88	135	90	115	86	203
Dongia	47	97	122	138	142	161
Altererythrobacter	67	143	149	115	135	98
BBMC-4	105	123	183	118	140	14
Phenylobacterium	78	127	173	102	130	58
Lapillicoccus	68	67	68	37	168	252
Thermomonas	80	103	250	96	90	30
Legionella	87	114	241	80	96	29
AKYG1722	95	191	87	80	44	150
SM1A02	62	108	122	186	54	114
Amb-16S-1323	83	137	197	62	48	93
Subgroup_10	145	104	105	76	89	83
Pedobacter	84	76	101	226	105	5
WPS-2	82	47	49	69	142	205
Methanosarcina	83	152	90	193	58	14
Stenotrophomonas	170	153	87	87	70	9
CCD24	64	136	115	69	70	122
Methanosaeta	18	26	232	242	35	9
SC-I-84	52	129	152	73	77	79
Vermiphilaceae	87	111	223	85	43	7
Chryseobacterium	182	123	68	97	68	7
Turicibacter	90	115	87	114	125	11
Aminobacter	61	109	83	145	63	76
OLB14	81	102	171	63	46	67
Microvirga	76	89	86	72	87	106
Lysobacter	124	147	51	105	59	24
Sphingopyxis	86	113	121	72	64	35
Brevundimonas	158	143	27	35	95	33
Agromyces	78	136	90	60	58	66
Pseudorhodoplanes	48	140	88	78	78	50
Aquicella	93	89	95	71	63	68
Pseudarthrobacter	86	176	23	31	67	96
JG30-KF-AS9	72	91	56	57	90	109
Pedosphaeraceae	123	95	72	79	73	26
Actinotalea	42	95	127	62	27	115
Methylocaldum	63	87	98	36	53	130
Nitrospira	106	91	112	68	57	31
0319-6G20	112	75	99	62	84	27
AD3	74	56	29	63	65	170
UTCFX1	101	86	59	94	81	35
Hirschia	48	73	79	82	65	109
B12-WMSP1	89	96	49	56	91	74
Mesorhizobium	43	105	75	92	83	55
Solirubrobacter	72	111	81	89	75	24
UBA6140	21	22	191	45	167	6
Actinomadura	88	58	92	82	74	54
Bauldia	62	101	88	61	49	84
MND1	44	86	121	27	81	79
Janibacter	104	48	99	76	92	6
Blastopirellula	45	95	69	98	37	81
Iamia	50	114	88	78	40	51
PLTA13	65	95	126	42	41	50
Mucilaginibacter	116	109	32	89	40	30
Aquisphaera	40	98	84	64	79	51
Pseudolabrys	56	53	93	65	100	43
Lysinibacillus	80	112	60	67	74	16
Pelagibius	31	43	242	33	13	46
env.OPS_17	98	37	142	82	30	13
Saccharomonospora	5	11	3	2	4	375
Gitt-GS-136	79	110	60	36	44	67
Dokdonella	32	112	104	65	39	41
Bdellovibrio	68	55	119	69	50	31
Edaphobaculum	114	68	84	65	51	7
Fimbriiglobus	44	73	40	101	42	84
S0134_terrestrial_group	74	87	107	27	38	50
Jatrophihabitans	66	39	51	33	87	106
Methanobacterium	45	41	127	121	43	3
Paeniclostridium	68	77	58	54	53	64
Pontibacter	144	157	10	37	19	2
Ramlibacter	76	69	55	45	60	60
Pajaroellobacter	48	68	85	49	81	25
Chloroplast	146	20	17	52	98	8
Luteitalea	32	89	67	68	25	58
Ellin6067	57	81	56	46	70	28
Chthonomonas	85	56	26	32	105	33
Sneathiella	12	20	228	33	33	11
Roseomonas	22	73	71	83	31	50
Novosphingobium	19	40	128	60	71	10
NB1-j	37	75	67	48	35	61
Burkholderia-Caballeronia-Paraburkholderia	51	72	19	26	92	56
Cellulosilyticum	64	40	51	41	89	30
Candidatus_Udaeobacter	52	53	31	63	89	25
FCPS473	79	30	18	31	73	69
Methylobacter	68	50	61	53	59	9
HSB_OF53-F07	35	61	21	32	33	116
S085	43	80	55	37	35	48
TRA3-20	57	89	63	27	45	17
Phycicoccus	58	77	15	26	31	91
Gaiella	51	82	48	41	49	22
Zoogloea	5	32	16	19	206	15
Gemmatimonas	62	51	36	40	48	55
Hydrogenophaga	13	19	131	33	85	8
Planctopirus	25	68	73	52	28	43
Niastella	92	56	45	23	55	12
Leptolinea	16	18	133	87	26	0
OM190	25	50	61	67	17	59
Polyangium	31	56	30	43	54	62
Sinomonas	60	70	26	18	52	49
JG30-KF-CM66	29	67	67	26	31	52
Acinetobacter	31	26	18	53	134	7
Arenimonas	27	33	114	44	32	16
Limnobacter	28	38	122	28	18	31
Taibaiella	45	43	68	62	43	3
Microbacterium	39	131	63	10	16	3
Geodermatophilus	31	33	35	30	60	66
Latescibacterota	9	12	177	25	16	12
ADurb.Bin063-1	38	36	31	76	55	14
Neochlamydia	40	50	47	80	24	1
AKYG587	23	39	28	40	20	92
Candidatus_Pacebacteria	30	32	106	53	16	2
Nannocystis	35	38	54	55	26	23
mle1-7	23	84	43	19	15	46
Methylomicrobium	7	11	165	24	16	5
Lachnospiraceae_NK3A20_group	8	24	146	13	19	17
Ruminiclostridium	38	44	80	21	25	14
CCM19a	21	62	58	26	14	41
Ellin6055	43	56	30	37	31	21
Anaeromyxobacter	40	44	30	31	58	14
Adhaeribacter	111	59	9	15	7	8
C0119	55	34	20	37	40	21
Geminicoccus	20	84	22	20	13	47
Rhodoplanes	36	46	28	20	41	31
Christensenellaceae_R-7_group	10	19	84	21	50	16
Dyadobacter	33	29	13	28	93	4
Dojkabacteria	22	41	77	39	14	2
cvE6	13	16	115	25	17	5
CL500-3	11	32	45	74	8	21
CCM11a	26	23	56	14	7	64
Pla1_lineage	16	30	69	48	20	6
RBG-13-54-9	34	22	51	28	14	38
NS9_marine_group	23	43	57	36	21	7
Hydrogenispora	31	26	53	13	33	29
1921-3	28	27	10	16	46	57
Chthoniobacter	56	39	27	40	17	5
Stenotrophobacter	25	31	47	39	21	21
Sandaracinus	27	19	76	29	18	14
Terrimicrobium	16	47	31	62	14	11
Methylobacterium-Methylorubrum	22	62	13	23	40	21
Nannocystaceae	46	36	32	41	7	18
TM7a	22	27	38	40	33	16
Fictibacillus	84	50	16	3	19	3
Aeromicrobium	19	33	42	36	17	26
Subgroup_7	26	24	27	32	47	16
Syntrophorhabdus	18	11	82	34	21	1
Bathyarchaeia	19	14	48	42	10	33
Caulobacter	11	23	17	20	82	8
IMCC26207	11	55	52	17	15	10
TM7	26	21	18	36	23	36
Methyloceanibacter	49	42	13	8	13	34
Tumebacillus	63	26	11	10	40	8
Truepera	20	14	42	19	10	53
Intrasporangium	53	22	11	13	35	22
Candidatus_Magasanikbacteria	5	2	135	8	1	5
Paenisporosarcina	42	111	0	0	1	1
Litorilinea	21	40	26	32	13	22
Candidatus_Protochlamydia	37	22	35	38	16	4
SJA-15	16	21	27	34	28	22
Candidatus_Xiphinematobacter	20	32	19	44	21	11
Opitutus	47	33	15	31	11	10
Sorangium	52	35	13	21	19	6
Treponema	0	1	50	11	81	1
Subgroup_18	8	9	67	15	37	7
IS-44	9	29	29	26	15	35
Paenarthrobacter	23	40	15	17	28	19
Ignavibacterium	9	6	22	63	40	2
MB-A2-108	20	33	12	11	15	48
Rhodopirellula	30	24	21	33	12	18
Defluviicoccus	22	48	7	5	16	40
Coxiella	46	19	21	34	12	5
Nordella	17	22	19	24	24	31
Candidatus_Koribacter	23	13	24	13	44	19
Singulisphaera	22	30	16	17	26	24
Terrisporobacter	21	31	20	11	40	12
Kribbella	16	16	18	7	53	23
Herpetosiphon	32	26	12	29	3	30
BD2-11_terrestrial_group	24	26	44	16	12	10
Longimicrobiaceae	22	35	24	24	11	15
Methanobrevibacter	24	23	27	47	8	1
Acetivibrio	38	25	21	13	23	10
mle1-8	8	18	64	22	11	7
Amaricoccus	9	32	30	22	14	22
Blastococcus	31	23	12	14	22	25
Methylocystis	18	23	30	12	13	30
Candidatus_Kaiserbacteria	22	22	40	20	16	5
Paenibacillus	40	19	14	12	33	7
Luteolibacter	25	29	29	33	5	3
Subgroup_2	5	15	13	23	42	26
Syntrophomonas	19	16	56	10	16	6
Fonticella	17	20	20	19	16	28
Shinella	9	52	28	19	7	4
Lacunisphaera	30	26	19	28	15	1
Fluviicola	10	2	89	14	2	1
Micromonospora	45	26	23	13	3	8
Hydrogenedensaceae	11	9	50	20	17	9
Methylosarcina	22	31	25	12	21	4
Candidatus_Moranbacteria	8	11	21	63	8	4
11-24	39	27	8	11	19	10
Schlesneria	8	18	31	25	9	20
JGI_0001001-H03	17	16	28	12	14	24
Gastranaerophilales	11	18	36	23	13	10
Oikopleura	15	42	14	22	14	3
Candidatus_Alysiosphaera	18	31	14	10	19	14
Bosea	14	33	26	19	7	6
Candidatus_Komeilibacteria	1	0	98	5	0	0
1921-2	15	17	9	8	27	27
Sphingobium	10	17	26	24	23	3
HN-HF0106	11	11	33	10	28	10
Lautropia	10	24	27	4	20	15
Gracilibacter	18	8	41	7	20	5
Smithella	2	4	64	24	2	2
Ferrovibrio	15	16	15	27	6	17
Rhodococcus	17	30	18	9	9	13
Syntrophus	2	2	57	26	7	1
Family_XIII_AD3011_group	2	19	51	9	6	8
Luedemannella	27	15	11	10	15	16
possiblenus_04	14	4	22	32	19	2
Fimbriimonadaceae	16	18	11	21	18	9
Candidatus_Chisholmbacteria	10	7	59	8	7	2
Nonomuraea	7	15	17	16	31	6
Roseimicrobium	13	22	26	20	6	4
Subgroup_17	5	28	10	25	14	9
Woeseia	19	14	10	6	37	5
Peredibacter	26	9	30	11	14	0
MIZ36	54	6	0	26	2	2
Cellulomonas	7	22	25	15	5	14
Solibacillus	22	18	14	12	12	9
Flavihumibacter	13	25	20	21	7	1
Candidatus_Woesebacteria	21	14	23	14	14	1
Verrucosispora	21	17	15	20	8	3
Ochrobactrum	5	6	22	27	11	13
Prosthecobacter	7	10	11	9	46	1
Fermentimonas	11	6	29	23	14	0
BD1-7_clade	4	5	30	11	27	6
Sumerlaea	7	15	26	22	10	2
Nitrosomonas	7	12	30	17	14	1
Leucobacter	4	24	24	15	7	7
Waddlia	6	32	11	22	8	0
Brucella	21	19	4	15	2	17
Obscuribacteraceae	15	13	7	12	13	18
Pseudonocardia	6	16	19	1	27	9
Acidovorax	2	7	4	4	57	4
Alterococcus	8	19	22	15	6	7
SG8-4	4	8	26	32	5	2
Rhodomicrobium	12	32	4	6	14	8
MBNT15	13	24	13	9	6	11
Subgroup_5	19	12	12	8	19	6
SJA-28	15	12	19	16	10	4
Dyella	7	6	24	8	14	16
EPR3968-O8a-Bc78	14	13	19	11	11	7
OM60(NOR5)_clade	5	21	19	15	14	1
PHOS-HE36	23	5	17	19	9	2
Persicitalea	2	8	5	11	47	2
Gemmataceae	11	6	5	16	14	22
Ktedonobacter	19	14	15	11	5	10
OPB41	13	6	23	18	6	7
Puia	14	12	6	7	31	3
Longispora	8	40	9	3	7	5
Actinophytocola	9	6	11	4	21	21
PAUC26f	7	14	24	14	4	9
Phaselicystis	8	18	11	15	11	8
Lineage_IIa	12	15	8	12	21	3
Cellulosimicrobium	3	25	22	12	2	7
Arachidicoccus	11	2	9	11	36	1
Armatimonadales	13	11	7	5	24	10
Chitinophaga	39	8	5	8	7	2
Sedimentibacter	7	16	28	10	3	5
S-70	15	7	19	11	8	8
Ornithinimicrobium	14	18	6	21	8	1
Actinoplanes	11	9	8	11	14	15
Chthonomonadales	16	8	13	7	21	2
Labrys	7	15	9	8	11	17
Denitratisoma	1	0	53	12	0	0
RB41	9	22	4	5	19	7
NS11-12_marine_group	8	5	38	11	1	2
Rhodobacter	6	12	23	11	7	6
AKYH767	8	8	17	17	12	3
Thauera	4	24	20	10	6	1
KI89A_clade	14	17	11	6	11	6
Noviherbaspirillum	17	17	5	4	15	7
Archangium	7	6	18	6	18	10
LD29	6	19	13	18	5	3
Glutamicibacter	10	15	9	2	7	20
Roseiarcus	11	9	6	17	12	8
Tepidamorphus	6	10	23	2	17	5
Spirochaeta	21	13	16	9	2	2
D05-2	11	20	12	12	2	6
Candidatus_Berkiella	8	17	10	12	5	11
Chthonobacter	4	11	16	16	3	13
Desulfomicrobium	0	5	8	6	43	1
Parafilimonas	15	6	16	9	14	2
G12-WMSP1	19	5	4	15	5	14
OM27_clade	8	12	14	15	5	8
Granulicella	12	8	9	10	13	10
Aneurinibacillus	5	19	14	6	15	2
Rhodanobacter	13	5	7	5	21	10
Kitasatospora	15	2	6	7	9	22
Leifsonia	12	16	8	6	4	15
WWH38	9	11	7	12	11	9
AKAU3564_sediment_group	3	8	37	3	5	3
Sericytochromatia	14	12	6	12	10	4
Ellin516	11	12	8	14	10	3
Roseisolibacter	8	11	3	6	14	16
Nostoc_PCC-7107	13	5	5	18	0	16
Cellvibrio	2	6	9	30	8	2
Pseudoduganella	34	9	0	5	2	6
Citricoccus	10	21	7	7	2	9
WWE3	12	8	6	14	4	12
Lacibacter	7	2	0	7	40	0
Imperialibacter	14	16	16	0	0	10
YC-ZSS-LKJ63	0	5	23	13	13	2
Sphaerobacter	20	12	8	6	5	3
Ferruginibacter	7	6	16	23	2	0
Methanoculleus	9	10	22	11	1	1
Mitochondria	30	2	4	15	2	0
Ruminococcus	12	8	11	6	9	7
WCHB1-41	1	2	35	9	6	0
Flavitalea	14	13	13	8	4	0
Sterolibacterium	0	2	48	1	1	0
P3OB-42	9	11	14	8	7	3
Exiguobacterium	17	21	8	1	1	3
Parvibaculum	5	7	17	2	19	1
CL500-29_marine_group	6	9	16	11	5	4
Marinilabiliaceae	0	0	0	1	49	1
mle1-27	6	7	6	7	19	5
Planktosalinus	11	6	10	19	3	1
Catenulispora	5	3	3	9	10	18
OLB13	5	9	7	17	9	1
211ds20	11	11	7	9	6	4
Parcubacteria	11	7	8	11	9	2
Clostridium_sensu_stricto_3	10	5	3	6	17	7
WS2	4	6	21	12	0	5
SM2D12	6	8	7	9	13	5
CPla-3_termite_group	6	7	7	16	8	3
Microgenomatia	10	11	15	5	4	2
Hymenobacter	6	31	2	1	5	2
Phormidium_SAG_37.90	15	0	0	31	0	1
Methylomonas	3	0	32	4	6	1
Candidatus_Chloroploca	15	5	11	10	2	3
Tundrisphaera	8	13	10	6	4	5
Moheibacter	2	6	9	16	13	0
PeM15	2	8	21	7	3	5
Azoarcus	1	5	23	2	14	1
Pir2_lineage	2	4	14	26	0	0
Virgisporangium	4	10	3	1	23	5
Blfdi19	9	6	10	6	4	10
Curvibacter	1	4	13	5	22	0
Taeseokella	0	1	0	2	41	1
Aureimonas	1	29	0	5	9	1
DMER64	0	0	39	5	0	0
Nocardia	6	14	2	6	7	9
Paludisphaera	0	10	17	14	1	2
Demequina	6	16	6	4	3	9
Parasegetibacter	14	7	5	11	5	1
Oligoflexus	12	7	7	12	4	1
Dadabacteriales	4	4	13	5	9	8
Pedosphaera	6	7	5	5	18	2
Lachnospiraceae	0	5	26	8	0	4
Acidiphilium	9	5	3	12	5	9
Estrella	10	8	4	17	3	0
A0839	4	10	13	3	5	6
Actinoallomurus	9	2	4	7	13	6
Thermoflavimicrobium	2	0	36	2	0	1
KD3-10	10	10	7	6	7	0
Galbitalea	5	20	9	4	1	1
Pelotomaculum	12	4	10	1	7	6
Paludibaculum	11	2	8	6	7	5
Babeliaceae	12	12	11	3	1	0
Rubrivivax	4	8	18	6	1	2
Candidatus_Falkowbacteria	1	2	8	25	2	0
Actinocorallia	9	9	0	11	2	7
RBG-16-49-21	0	0	21	9	7	0
RCP2-54	12	4	6	5	6	4
Inquilinus	6	5	6	7	7	6
Modestobacter	7	4	2	0	10	14
Rickettsiella	9	1	21	5	1	0
Abditibacterium	4	9	5	12	4	2
Xanthobacteraceae	4	6	9	7	1	9
Ketobacter	4	1	13	2	14	2
Paracoccus	1	11	7	4	6	7
Methanospirillum	0	0	6	10	20	0
DS-100	1	11	6	2	6	10
Clostridium_sensu_stricto_12	8	3	4	4	14	3
BD7-11	4	1	5	10	6	9
KF-JG30-B3	5	9	3	8	3	7
Algoriphagus	13	9	4	6	2	1
Sva0485	2	4	12	10	7	0
Candidatus_Nomurabacteria	5	1	17	11	0	1
Tepidisphaera	3	5	6	14	1	5
Muricauda	0	2	28	0	1	3
Candidatus_Omnitrophus	8	2	5	15	3	1
BIyi10	4	7	3	4	16	0
Asanoa	3	2	4	2	6	16
Quadrisphaera	1	3	6	5	3	15
Candidatus_Entotheonella	6	15	1	1	6	4
Rheinheimera	3	1	8	2	17	1
Dactylosporangium	9	3	1	2	8	9
Clostridium_sensu_stricto_13	4	6	8	3	8	3
Gammaproteobacteria	8	10	0	3	4	7
Sphingosinicella	2	10	10	5	4	1
Desulfovibrio	2	4	8	0	15	3
Thermomonospora	2	6	19	0	4	0
Lentimicrobium	6	0	15	8	2	0
UCG-010	1	9	9	3	4	5
Blastocatella	4	3	2	4	7	11
Luteibacter	19	0	2	0	8	2
Candidatus_Saccharimonas	2	4	15	3	7	0
B1-7BS	7	4	8	2	7	3
Candidatus_Adlerbacteria	4	3	16	5	1	2
Filomicrobium	1	7	11	2	4	5
Ercella	4	0	14	3	8	1
BSV26	2	2	3	20	3	0
Zixibacteria	6	3	8	4	6	3
Parviterribacter	4	5	12	4	4	1
Lineage_IIb	6	8	4	9	2	1
Pseudoxanthobacter	3	7	7	3	3	7
Minicystis	3	3	4	12	4	4
bacteriap25	4	6	6	6	7	1
Delftia	1	3	1	2	23	0
Tellurimicrobium	3	8	5	6	1	6
WCHB1-81	0	3	14	8	4	0
Ga0077536	3	7	8	4	1	6
DEV007	6	6	7	6	4	0
Gemmobacter	4	1	8	5	11	0
Spirosoma	0	25	1	3	0	0
Microtrichales	2	7	7	8	3	1
AKIW781	4	5	3	3	4	9
Planifilum	5	9	4	2	1	7
Pseudofulvimonas	0	4	4	9	5	6
Phreatobacter	4	8	5	3	5	3
Alsobacter	10	2	3	3	6	4
Stella	6	2	13	1	3	3
Pseudenhygromyxa	7	4	5	6	3	3
Sediminibacterium	7	5	2	3	10	1
Unknown_Family	3	9	3	8	3	2
Anaerovoracaceae	0	0	7	16	5	0
Segetibacter	11	4	3	7	2	0
Amycolatopsis	6	3	8	2	4	4
Flaviaesturariibacter	18	3	1	5	0	0
BSV40	2	1	4	1	19	0
Anseongella	0	0	0	0	26	0
Aridibacter	5	2	2	7	2	8
Ahniella	1	1	18	5	0	1
Chryseomicrobium	11	15	0	0	0	0
Rice_Cluster_I	1	3	2	13	5	1
37-13	2	3	5	1	14	0
Streptacidiphilus	8	6	2	1	7	1
Limnochordaceae	4	8	3	4	2	4
SCGC_AAA011-D5	0	0	9	13	3	0
Aquabacterium	0	1	13	2	8	1
Variovorax	6	3	0	1	14	1
Novibacillus	1	3	0	0	2	19
Prevotella	14	3	1	2	3	1
Dinghuibacter	3	4	8	6	3	0
Alkaliphilus	7	7	2	0	0	8
Chelatococcus	2	7	10	1	1	3
Petrimonas	0	0	13	3	8	0
Sporichthya	5	6	2	6	1	4
Hungateiclostridium	6	2	6	1	8	1
Lechevalieria	5	2	2	1	9	5
Cryptanaerobacter	4	3	9	2	1	5
Candidatus_Cloacimonas	0	0	24	0	0	0
LNR_A2-18	0	0	22	0	1	0
Crossiella	9	3	3	0	4	4
OLB12	1	1	6	14	1	0
SAR324_clade(Marine_group_B)	7	5	8	3	0	0
Lentimicrobiaceae	2	0	3	17	1	0
1013-28-CG33	3	0	7	5	6	2
Kazania	4	1	0	13	3	2
vadinHA49	4	4	5	3	5	2
Aquamicrobium	0	4	11	4	3	1
JG36-GS-52	2	7	5	3	4	2
PB19	0	3	17	1	1	1
Thermoactinomyces	3	3	9	0	6	1
Tepidisphaeraceae	3	4	4	7	2	2
Chelativorans	1	4	12	2	1	2
Vulgatibacter	7	10	1	1	1	2
Leadbetterella	4	1	5	1	11	0
Magnetospirillaceae	2	2	13	0	3	2
Gracilibacteria	1	1	13	1	6	0
1174-901-12	4	8	1	4	2	3
Kineosporia	0	22	0	0	0	0
4572-13	1	1	12	6	2	0
Urania-1B-19_marine_sediment_group	2	0	17	1	1	0
Azospira	0	0	20	0	1	0
Devosiaceae	1	3	3	14	0	0
Methanoregula	0	1	3	13	4	0
Syntrophobacter	3	4	2	5	7	0
Izemoplasmatales	6	8	2	1	4	0
Pusillimonas	5	4	8	1	3	0
Kutzneria	4	2	2	2	6	5
P2-11E	3	4	2	6	5	1
Elev-16S-1166	1	8	5	1	1	5
Rokubacteriales	0	3	6	3	5	4
Edaphobacter	5	3	1	8	2	2
alphaI_cluster	4	2	2	6	5	2
Krasilnikovia	1	3	1	14	0	2
Oceanibaculum	2	0	2	0	16	1
Brevibacillus	1	7	3	3	5	1
Pseudaminobacter	0	2	7	7	1	3
Glycomyces	2	2	5	3	7	1
Gordonia	2	7	5	3	1	2
Actinopolymorpha	1	4	4	0	5	6
Cohnella	3	2	4	2	6	3
Hoeflea	0	8	0	3	6	3
Salinispira	0	1	12	7	0	0
Candidatus_Kerfeldbacteria	1	0	12	5	1	1
Caproiciproducens	3	2	6	6	2	1
Blastochloris	1	0	13	2	2	2
GWC2-45-44	2	3	4	10	1	0
Mogibacterium	1	2	10	2	4	1
Planomicrobium	8	11	1	0	0	0
Methanomassiliicoccus	7	4	3	4	1	0
Sphaerisporangium	7	0	4	4	3	1
Arcticibacter	5	3	0	10	0	1
Arsenicitalea	2	6	2	4	0	5
Camelimonas	1	1	3	7	5	2
Asticcacaulis	1	1	0	5	7	5
Anaerovorax	2	2	6	1	8	0
Frankiales	1	5	4	4	0	5
Clostridia_vadinBB60_group	5	5	3	3	1	2
Candidatus_Campbellbacteria	0	2	5	5	6	1
MBA03	6	7	1	0	0	5
Limibaculum	1	8	1	3	3	3
Cnuella	6	10	1	2	0	0
DNF00809	1	3	7	3	0	5
Niabella	4	3	2	5	4	0
Myxococcus	4	1	0	3	5	5
Pelolinea	4	0	6	5	3	0
Escherichia-Shigella	6	0	1	0	9	2
Clostridia_UCG-014	6	2	1	2	6	1
Dietzia	2	7	2	4	0	3
Candidatus_Ovatusbacter	2	6	0	5	3	2
Rummeliibacillus	0	3	2	1	12	0
UBA12409	2	1	9	5	1	0
Vampirovibrionales	3	2	4	1	5	3
Pla3_lineage	7	2	2	3	2	2
KCLunmb-38-53	1	1	4	10	2	0
Euzebya	1	2	7	2	1	5
Nitrobacter	2	2	3	6	2	2
Enterobacter	3	10	2	1	1	0
Elioraea	0	5	3	4	3	2
Lutispora	2	3	6	4	1	1
Cupriavidus	1	4	4	1	5	2
Caldicoprobacter	7	4	0	2	0	4
Verruc-01	2	5	1	6	3	0
Saccharopolyspora	0	2	5	2	5	3
Thermobacillus	7	2	4	0	2	2
Anaerosporobacter	4	2	1	2	6	2
Rhodoligotrophos	2	0	2	4	3	6
SHA-26	1	6	2	1	5	2
Constrictibacter	3	8	1	1	1	3
Leptospira	0	4	0	0	12	1
Rhodopila	0	1	2	7	4	3
Qipengyuania	2	4	3	4	1	3
Smaragdicoccus	4	3	1	4	0	4
Terracidiphilus	1	3	3	3	3	3
UA11	3	3	4	5	1	0
Ammoniphilus	3	3	2	1	7	0
Sulfurovum	4	1	2	3	5	1
Aminicenantales	0	2	0	11	3	0
Leptonema	0	1	3	1	11	0
Comamonas	0	3	5	7	0	1
BSV13	1	2	3	5	5	0
Desulfallas-Sporotomaculum	6	4	0	1	1	4
FFCH5909	2	0	3	4	2	5
Roseimaritima	3	1	2	7	0	2
Seinonella	5	0	6	3	1	0
GAL15	0	2	3	2	1	7
Chthoniobacteraceae	0	5	4	3	3	0
Desulfatiglans	2	2	0	9	2	0
Actinomycetospora	3	3	1	1	5	2
1959-1	3	3	0	1	6	2
Herbinix	3	3	0	4	3	2
Piscinibacter	0	3	6	3	2	1
Levilinea	0	0	3	9	3	0
Rhodopseudomonas	1	8	0	3	3	0
Longivirga	1	3	7	1	1	2
Sulfurifustis	2	3	3	2	4	1
M55-D21	6	1	2	1	1	4
Gaiellales	1	2	5	5	1	0
UCG-004	0	0	8	2	4	0
Methanolinea	0	0	0	14	0	0
Arthrobacter	1	4	2	3	3	1
ADurb.Bin180	1	1	7	4	0	1
Rugamonas	1	2	1	4	2	4
Tissierella	5	4	0	3	1	1
Vicingus	0	0	14	0	0	0
Eel-36e1D6	3	2	3	1	3	2
Rhodothermaceae	7	3	0	1	3	0
Syner-01	0	0	9	0	5	0
Isoptericola	5	4	1	2	1	1
Berkelbacteria	0	3	3	4	4	0
Vicinamibacter	3	4	1	2	4	0
LD1-PB3	0	0	11	3	0	0
Sporocytophaga	2	7	5	0	0	0
Candidatus_Levybacteria	2	2	4	3	3	0
Enterococcus	0	12	1	0	1	0
Rurimicrobium	0	1	10	2	0	0
Methanofollis	0	2	4	4	2	1
UA-50	1	2	0	9	1	0
Chloronema	1	6	2	1	0	3
Hyphomonas	1	2	4	2	4	0
YB-42	8	1	0	3	0	1
Methyloterricola	0	0	7	2	0	4
Endomicrobium	1	0	2	5	4	1
Defluviimonas	0	2	8	0	1	2
Candidatus_Paracaedibacter	2	1	3	2	5	0
Tagaea	2	4	4	2	0	1
Paucibacter	0	1	0	0	12	0
Sphingobacteriaceae	0	2	1	8	0	1
Thermobifida	4	6	1	0	0	1
Flexilinea	0	0	6	4	2	0
Bacteroides	1	1	6	1	3	0
Subgroup_13	2	3	2	2	2	1
Methyloparacoccus	1	0	6	4	1	0
Tahibacter	5	1	1	2	1	2
NK4A214_group	3	3	3	1	1	1
Acidipila	0	0	4	4	2	2
DTU014	0	0	3	3	1	5
DSSF69	0	2	0	2	4	4
Halocella	2	5	1	3	0	1
Leptothrix	2	0	4	2	1	3
Gemmatimonadaceae	2	1	4	4	0	0
Proteiniphilum	0	0	10	1	0	0
Pelagibacterium	1	4	3	3	0	0
KF-JG30-C25	1	1	1	2	3	3
Duganella	3	1	1	0	6	0
Ilumatobacteraceae	1	3	2	5	0	0
Crocinitomix	0	1	5	4	1	0
Psychroglaciecola	3	2	2	1	1	2
Subgroup_21	2	1	2	1	2	3
Candidatus_Anammoximicrobium	0	0	9	2	0	0
Microbispora	2	0	4	3	0	2
Lactobacillus	3	5	0	0	2	1
Desulfitibacter	2	3	2	0	3	1
Faecalibacterium	2	4	0	4	0	1
RF39	2	1	5	0	3	0
Oscillospirales	1	2	1	0	2	5
Lineage_IV	1	5	1	1	2	1
Azospirillum	4	1	3	0	2	1
C1-B045	0	0	4	1	5	1
Latescibacteraceae	1	0	1	1	7	1
Vampirovibrio	1	2	3	2	2	1
Geothrix	0	2	1	1	7	0
Symbiobacterium	2	0	6	1	1	0
KD3-93	1	2	7	0	0	0
Acidobacteriales	2	1	0	4	2	1
Cephaloticoccus	0	0	6	2	2	0
Proteiniclasticum	1	3	5	0	0	1
BacC-u-018	3	3	1	0	1	2
type_III	3	1	0	4	1	1
Kapabacteriales	2	0	2	4	1	1
Shimazuella	2	0	3	3	1	1
Clostridium_sensu_stricto_6	2	1	1	2	2	2
GW2011_GWC1_47_15	2	1	1	2	3	1
Longilinea	0	0	7	3	0	0
Woesearchaeales	0	1	2	6	1	0
Candidatus_Zambryskibacteria	2	0	6	0	0	2
A21b	1	5	0	0	3	1
Pseudohongiella	2	1	1	3	2	1
Tetrasphaera	1	1	3	3	0	2
Paraclostridium	3	5	0	1	0	1
AB1	0	1	2	2	1	4
Georgenia	0	4	1	2	2	1
Aminivibrio	0	1	9	0	0	0
Turneriella	0	1	2	0	7	0
Nitrososphaeraceae	2	3	0	3	1	0
Thermostaphylospora	2	0	1	0	4	2
Haloactinopolyspora	1	4	0	1	2	1
Solitalea	2	0	7	0	0	0
Pseudoflavitalea	1	1	4	3	0	0
Candidatus_Collierbacteria	3	1	4	1	0	0
Candidatus_Amesbacteria	1	0	1	3	4	0
AKIW659	1	3	4	1	0	0
Candidatus_Latescibacter	1	0	5	0	3	0
M2PB4-65_termite_group	0	0	9	0	0	0
Promicromonospora	2	3	2	0	1	1
Desulfobulbus	0	0	5	3	1	0
Elizabethkingia	4	0	1	3	0	1
Methylosinus	0	3	3	1	1	1
Planosporangium	1	0	0	3	5	0
Kaistia	0	1	0	5	1	2
Oxobacter	0	1	4	0	4	0
Candidatus_Peribacteria	0	1	5	2	0	1
Pla4_lineage	1	1	4	3	0	0
Clostridium_sensu_stricto_8	3	4	0	1	1	0
MVP-88	1	1	2	1	4	0
CAG-352	1	0	1	2	4	1
Desulfosporosinus	4	4	1	0	0	0
Muribaculaceae	0	4	2	0	3	0
Micropepsis	2	0	3	0	0	4
Staphylococcus	0	2	2	2	3	0
Anaerocolumna	2	2	3	0	2	0
Rubrivirga	0	0	0	8	1	0
Desulfotomaculum	3	1	1	1	3	0
Craurococcus-Caldovatus	1	2	0	3	0	3
Haloplasma	1	2	0	0	5	1
27F-1492R	2	0	4	3	0	0
Belnapia	0	1	0	5	3	0
WS4	2	2	1	0	1	3
Aeromonas	0	2	3	0	1	2
Bordetella	3	1	1	2	0	1
Oryzihumus	0	1	2	5	0	0
MSB-3C8	0	0	8	0	0	0
Amphiplicatus	2	0	0	1	2	3
Macellibacteroides	0	0	6	2	0	0
Steroidobacteraceae	0	2	2	4	0	0
Acholeplasma	0	0	6	0	2	0
Candidatus_Vogelbacteria	0	0	4	3	1	0
Babeliales	0	2	0	5	1	0
Streptococcus	1	2	0	2	3	0
AT-s3-44	0	1	1	0	5	1
Cerasicoccus	0	5	2	1	0	0
Curtobacterium	0	3	1	0	4	0
Leptolyngbya_Es-Yyy1000	2	0	0	3	2	1
Pelomonas	0	0	3	2	3	0
Subgroup_22	1	0	1	3	3	0
Vampirovibrionaceae	3	0	1	3	0	1
Sporobacter	0	0	1	2	3	2
Acetitomaculum	0	1	7	0	0	0
Candidatus_Azambacteria	0	0	6	1	1	0
Rubrobacter	2	2	1	0	1	2
Terriglobus	2	1	0	3	1	1
Corynebacterium	1	2	3	1	1	0
Atopobium	1	2	4	0	1	0
Nibribacter	1	5	0	0	2	0
Desulfofustis	0	0	8	0	0	0
Microcoleus_SAG_1449-1a	3	0	1	3	0	1
Flectobacillus	0	1	0	0	7	0
Rhizorhapis	4	0	0	0	3	1
JGI_0000069-P22	0	0	8	0	0	0
Weeksellaceae	0	0	0	7	0	0
Hephaestia	0	0	3	2	2	0
Caulobacteraceae	0	2	0	5	0	0
Actinomarinales	0	3	3	1	0	0
Roseimarinus	0	0	4	0	3	0
Oxalicibacterium	0	2	4	0	0	1
Desulfitobacterium	2	2	0	1	1	1
Nubsella	3	0	0	4	0	0
Castellaniella	1	0	4	0	0	2
FCPU426	1	1	2	2	1	0
Alloprevotella	6	0	1	0	0	0
Thiobacillus	0	0	5	1	1	0
Rhizobacter	0	4	1	2	0	0
Oceanobacillus	2	2	0	1	2	0
Kocuria	1	1	1	1	2	1
GIF9	0	0	3	4	0	0
Cloacibacterium	0	0	7	0	0	0
Candidatus_Captivus	1	4	1	1	0	0
Agathobacter	3	1	0	0	2	1
p-1088-a5_gut_group	0	1	2	2	2	0
Advenella	1	2	3	1	0	0
OLB8	0	1	3	3	0	0
Silvanigrella	1	2	3	1	0	0
D8A-2	3	1	2	0	0	1
UCG-005	1	2	2	2	0	0
Microlunatus	1	3	2	0	1	0
Deinococcus	3	1	0	1	1	1
Dethiobacter	3	2	2	0	0	0
Emticicia	0	0	2	1	4	0
Desmonostoc_PCC-7422	0	0	2	0	0	5
Kineosporiaceae	0	1	2	4	0	0
Chlamydiaceae	1	2	1	1	2	0
Methylocella	0	3	1	1	1	1
Perlucidibaca	0	0	1	0	6	0
Effusibacillus	0	1	0	0	6	0
Rudaea	1	2	0	0	3	1
SM23-30	0	0	3	3	1	0
JTB23	0	1	3	1	2	0
Sandaracinobacter	0	0	2	3	2	0
661239	2	1	3	0	0	1
Vicinamibacterales	0	0	2	2	0	2
vadinBA26	1	0	4	0	1	0
Salinispora	0	2	3	0	1	0
Larkinella	1	1	1	3	0	0
Clostridium_sensu_stricto_18	1	4	0	0	1	0
JCM_18997	0	3	1	2	0	0
Bifidobacterium	2	3	0	0	1	0
MM2	1	0	2	1	2	0
Parablastomonas	0	0	3	3	0	0
Bacteriovorax	1	0	3	1	1	0
AKAU4049	0	0	0	3	3	0
Panacagrimonas	3	0	0	2	0	1
Thermincola	1	1	2	0	0	2
Risungbinella	1	1	4	0	0	0
Planococcus	2	3	0	0	1	0
Entotheonellaceae	0	0	1	4	1	0
Ellin517	5	0	0	0	1	0
Plantactinospora	2	0	1	1	0	2
Sporomusa	1	3	1	1	0	0
Fontibacter	0	0	5	0	1	0
Pseudonocardiaceae	0	0	3	0	0	3
Thermocrispum	0	3	1	0	2	0
Monoglobus	0	2	2	1	1	0
Meniscus	0	1	3	2	0	0
Methylobacillus	1	1	1	1	2	0
RD011	5	0	0	1	0	0
Salinicoccus	0	1	5	0	0	0
Aetherobacter	0	1	0	1	4	0
Afipia	0	1	1	3	0	1
Chlorobaculum	0	0	1	5	0	0
Empedobacter	0	0	0	3	3	0
Sh765B-TzT-20	1	1	0	3	1	0
Sphingoaurantiacus	0	0	3	2	0	1
IheB3-7	0	0	6	0	0	0
Spirochaeta_2	0	0	6	0	0	0
Tenggerimyces	1	1	0	0	0	3
Ensifer	0	2	1	0	2	0
Methanocella	1	0	0	3	1	0
URHD0088	0	1	1	0	1	2
Olivibacter	1	0	0	1	0	3
Streptosporangium	1	1	1	1	0	1
Incertae_Sedis	0	0	1	2	2	0
Serratia	3	0	1	0	1	0
Blastocatellaceae	0	0	1	4	0	0
Citreitalea	0	1	0	3	0	1
Candidatus_Caldatribacterium	0	0	2	3	0	0
Candidatus_Megaira	0	0	2	1	2	0
Occallatibacter	1	1	0	1	1	1
MWH-CFBk5	1	0	4	0	0	0
Thalassobaculum	1	2	1	0	1	0
Candidatus_Soleaferrea	0	2	3	0	0	0
Catellatospora	1	0	1	1	1	1
Allostreptomyces	2	1	1	0	1	0
Rubinisphaera	0	2	0	1	1	1
Sporacetigenium	0	0	1	0	1	3
Bhargavaea	1	0	3	1	0	0
Microbulbifer	2	2	1	0	0	0
Rhizobiales	1	0	1	2	0	1
Nitrosospira	2	1	1	0	0	1
Olsenella	0	0	4	1	0	0
Rhizomicrobium	0	0	0	5	0	0
Candidatus_Uhrbacteria	0	0	2	2	0	1
Halomonas	2	0	1	2	0	0
Fastidiosipila	0	0	1	0	2	2
Pseudorhodoferax	2	2	1	0	0	0
MidBa8	0	0	0	0	5	0
Candidatus_Nucleicultrix	0	1	1	0	3	0
Bythopirellula	1	3	0	1	0	0
Absconditabacteriales_(SR1)	1	0	1	3	0	0
Xylophilus	0	1	1	1	2	0
Arcobacter	0	1	0	4	0	0
Xanthobacter	0	0	1	0	3	1
Ammoniibacillus	0	4	0	0	1	0
Photobacterium	0	0	0	0	5	0
Leptolyngbya_VRUC_135	0	0	0	0	0	5
Fontimonas	0	0	4	0	0	0
AB-539-J10	1	0	3	0	0	0
Siccirubricoccus	2	0	0	0	0	2
Clostridium_sensu_stricto_11	2	1	0	1	0	0
TSBb06	0	0	1	3	0	0
Pelobium	0	1	2	0	1	0
DEV008	0	0	1	1	2	0
SAR202_clade	1	0	1	1	1	0
Candidatus_Amoebophilus	1	1	2	0	0	0
Nitrosotaleaceae	0	1	0	2	0	1
Ideonella	0	0	3	0	1	0
Alcaligenaceae	0	1	1	0	1	1
Isosphaera	0	0	0	2	1	1
Xanthomonas	0	4	0	0	0	0
UCG-012	2	1	1	0	0	0
Solirubrobacteraceae	1	2	0	1	0	0
Micrococcaceae	1	1	0	1	0	1
Domibacillus	3	0	0	1	0	0
Caryophanon	0	2	0	2	0	0
JS1	0	0	4	0	0	0
Candidatus_Peregrinibacteria	0	1	0	0	3	0
ML635J-40_aquatic_group	0	0	4	0	0	0
Paramesorhizobium	0	0	3	1	0	0
Anaerosporomusa	0	2	1	0	1	0
GIF3	0	0	2	2	0	0
Phaeodactylibacter	1	1	0	2	0	0
SH3-11	0	0	2	0	2	0
JTB255_marine_benthic_group	0	0	2	2	0	0
Mumia	1	1	1	0	0	1
Myroides	0	0	0	4	0	0
Clostridium_sensu_stricto_5	0	2	0	1	0	1
Desulfococcus	1	0	3	0	0	0
YC-ZSS-LKJ147	1	1	0	0	2	0
Subgroup_25	0	3	0	1	0	0
Paucisalibacillus	3	0	1	0	0	0
Clostridium_sensu_stricto_10	0	0	1	3	0	0
Tepidimicrobium	1	0	0	1	2	0
Rhodoblastus	1	0	1	0	1	1
Desulfofarcimen	3	0	0	0	1	0
Alcanivorax	0	0	1	0	2	1
Calothrix_PCC-6303	0	0	1	0	0	3
GOUTB8	1	0	3	0	0	0
Pelosinus	0	0	0	1	3	0
Nakamurella	1	0	0	2	0	1
Candidatus_Buchananbacteria	0	0	4	0	0	0
Thalassobacillus	1	0	1	0	1	1
SM1B06	0	1	0	0	3	0
Anaerosolibacter	0	1	2	1	0	0
Simplicispira	0	0	3	0	1	0
Roseateles	2	2	0	0	0	0
Simkania	0	2	2	0	0	0
Cystobacter	0	0	3	0	0	1
Subgroup_9	1	0	0	3	0	0
Faecalitalea	0	0	0	0	4	0
Candidatus_Nostocoida	0	0	1	1	0	1
Candidatus_Methanofastidiosum	0	0	3	0	0	0
Bacteroidetes_BD2-2	2	0	1	0	0	0
Myxococcaceae	2	1	0	0	0	0
Geodermatophilaceae	1	2	0	0	0	0
Membranicola	0	0	2	1	0	0
Beijerinckia	1	1	0	0	0	1
DEV114	0	0	3	0	0	0
B108	0	0	1	0	1	1
SR-FBR-L83	0	0	1	2	0	0
Lachnoclostridium	1	1	1	0	0	0
Moduliflexaceae	0	0	3	0	0	0
Jahnella	0	1	0	2	0	0
UCG-007	1	0	1	1	0	0
Vulcaniibacterium	0	1	1	1	0	0
Planctomycetales	2	0	0	0	1	0
Desulfovirga	1	1	0	0	0	1
B10-SB3A	1	1	0	1	0	0
Aggregicoccus	2	0	0	1	0	0
Actinospica	1	0	0	0	1	1
Soehngenia	0	0	3	0	0	0
Brachybacterium	1	0	1	1	0	0
Anaerolineaceae_UCG-001	0	0	0	3	0	0
Bradymonadales	0	1	1	0	0	1
Rickettsia	0	0	1	2	0	0
Lachnospiraceae_NK4A136_group	1	0	0	0	2	0
Sulfuricurvum	0	1	1	0	1	0
Marinibaculum	0	1	2	0	0	0
Porticoccus	0	0	2	0	0	1
Skermanella	0	1	0	1	1	0
Methylophilus	0	1	0	0	1	1
Sphaerimonospora	0	0	2	0	0	1
Labilithrix	0	0	2	1	0	0
Anaerobacterium	1	0	2	0	0	0
Thioalkalispira-Sulfurivermis	0	0	1	1	0	1
Nevskia	0	1	1	0	1	0
Kosakonia	3	0	0	0	0	0
Salimesophilobacter	0	0	3	0	0	0
BRH-c20a	0	0	1	2	0	0
Cytophaga	0	0	0	2	1	0
Lineage_IIc	0	1	1	1	0	0
Coprococcus	3	0	0	0	0	0
Methylophaga	0	1	2	0	0	0
Fischerella_CENA298	1	0	0	1	0	1
Aliihoeflea	0	0	2	1	0	0
Anaerostignum	0	0	0	1	2	0
Intestinibacter	0	1	1	0	1	0
Hydrogenoanaerobacterium	1	1	1	0	0	0
Colidextribacter	0	0	2	0	1	0
CPR2	0	0	1	1	1	0
Pseudactinotalea	1	1	0	0	1	0
Enhydrobacter	0	2	1	0	0	0
SHA-4	0	0	1	2	0	0
Herbidospora	0	3	0	0	0	0
Undibacterium	0	0	0	0	3	0
Prevotellaceae_Ga6A1_group	0	1	0	0	2	0
Roseobacter_clade_CHAB-I-5_lineage	0	0	0	0	3	0
Parapedobacter	0	0	0	1	1	0
Angustibacter	0	1	0	0	1	0
Nostoc_PCC-7524	2	0	0	0	0	0
Methylococcus	0	0	1	1	0	0
Nocardiaceae	0	1	0	1	0	0
Methyloligellaceae	0	0	0	0	2	0
IMCC26134	0	0	0	2	0	0
Dialister	2	0	0	0	0	0
Geobacter	1	0	1	0	0	0
Candidatus_Staskawiczbacteria	0	0	2	0	0	0
Plot4-2H12	0	0	0	2	0	0
Pseudobacteroides	1	1	0	0	0	0
Methanosphaera	1	1	0	0	0	0
Solimonas	1	0	0	0	1	0
Blautia	1	0	0	0	1	0
Micromonosporaceae	1	0	0	0	0	1
Rikenellaceae_RC9_gut_group	0	1	0	0	1	0
Bacteroidetes_VC2.1_Bac22	0	0	1	1	0	0
Zavarzinella	1	0	0	1	0	0
Defluviitalea	1	0	0	0	0	1
Ignavibacteriales	0	0	2	0	0	0
Ureibacillus	0	1	1	0	0	0
Rubellimicrobium	0	1	1	0	0	0
Citrifermentans	0	0	0	1	1	0
Verticiella	1	1	0	0	0	0
Microcoleus_PCC-7113	0	0	0	2	0	0
N9D0	0	0	1	0	1	0
Lenti-02	0	0	2	0	0	0
Mitsuaria	1	1	0	0	0	0
FFCH16263	0	0	0	2	0	0
Ciceribacter	0	0	2	0	0	0
SN8	0	0	1	1	0	0
ADurb.Bin118	0	0	0	2	0	0
UBA12411	0	1	0	1	0	0
Desulfuromonadaceae	0	0	1	0	1	0
JGI-0000079-D21	0	0	0	2	0	0
Proteiniborus	1	0	0	1	0	0
Dehalobacterium	1	0	1	0	0	0
Rhodocytophaga	0	1	0	1	0	0
Hoppeia	0	0	2	0	0	0
Methylomagnum	0	0	0	1	1	0
3M1PL1-52_termite_group	0	0	1	0	1	0
Povalibacter	0	0	0	1	0	1
Stakelama	0	0	1	1	0	0
Egicoccus	1	0	0	0	1	0
EF100-94H03	1	0	1	0	0	0
Sinibacillus	1	0	0	1	0	0
Parapusillimonas	0	0	0	1	1	0
FS117-23B-02	0	0	2	0	0	0
Leptolyngbya_ANT.L52.2	0	0	0	2	0	0
Leptolyngbya_PCC-6306	0	0	0	2	0	0
S-BQ2-57_soil_group	1	1	0	0	0	0
Nesterenkonia	0	0	0	1	0	1
Psychrobacillus	1	1	0	0	0	0
Klebsiella	1	0	1	0	0	0
Siphonobacter	0	2	0	0	0	0
Fibrisoma	0	0	0	0	0	2
Rufibacter	0	2	0	0	0	0
Dechlorobacter	0	0	1	1	0	0
Tabrizicola	0	0	1	0	0	1
Prolixibacteraceae	0	0	0	2	0	0
Solobacterium	0	0	2	0	0	0
IheB2-23	0	1	0	1	0	0
Salirhabdus	1	0	0	0	1	0
Williamsia	0	0	0	0	1	1
Sideroxydans	0	0	1	1	0	0
Hamadaea	0	1	1	0	0	0
Pseudosporangium	0	0	0	2	0	0
JG36-TzT-191	0	1	0	1	0	0
Dehalobacter	0	1	1	0	0	0
Clostridium_sensu_stricto_7	0	0	0	2	0	0
UCG-002	2	0	0	0	0	0
Amnibacterium	0	0	0	0	1	1
01D2Z36	0	1	0	1	0	0
Sva0081_sediment_group	0	0	2	0	0	0
Saccharothrix	0	0	0	0	2	0
Thermobispora	0	0	2	0	0	0
Haliea	0	0	0	0	2	0
Lactococcus	0	1	1	0	0	0
Candidatus_Babela	0	1	1	0	0	0
SD04E11	1	0	0	0	1	0
Blvii28_wastewater-sludge_group	0	0	2	0	0	0
BRH-c8a	1	0	0	1	0	0
Salinarimonas	0	2	0	0	0	0
Subgroup_11	0	0	1	0	0	1
Helicobacter	0	1	0	0	1	0
Nitriliruptoraceae	0	1	0	1	0	0
Telmatospirillum	0	0	0	0	2	0
Acetonema	1	0	0	0	0	1
Irregularibacter	0	0	0	0	0	2
Zavarziniaceae	0	1	0	1	0	0
Pseudogracilibacillus	1	0	0	1	0	0
Dechloromonas	1	0	0	0	1	0
WD260	0	0	1	0	1	0
Amnipila	0	1	0	0	1	0
TX1A-55	0	0	1	0	0	1
Anaerocella	0	0	1	0	1	0
Polymorphobacter	0	1	0	0	0	1
FW22	0	0	0	1	1	0
Sulfurimonas	0	0	2	0	0	0
dgA-11_gut_group	0	0	1	1	0	0
EC3	1	0	0	1	0	0
Klenkia	0	0	1	0	0	1
Oscillibacter	0	0	1	0	1	0
WX65	1	1	0	0	0	0
Ga0074140	0	0	1	0	0	1
Actinomyces	0	2	0	0	0	0
Thermoleophilum	0	2	0	0	0	0
KD1-131	0	0	0	2	0	0
Dubosiella	0	1	1	0	0	0
Rhodoferax	0	0	2	0	0	0
Pantoea	0	0	1	0	0	1
Amphibacillus	0	1	0	1	0	0
Howardella	1	1	0	0	0	0
Candidatus_Nitrososphaera	1	1	0	0	0	0
RsaHf231	0	2	0	0	0	0
Candidatus_Woykebacteria	0	0	0	1	0	1
Holophaga	0	0	0	0	2	0
RBG-13-46-9	0	0	1	1	0	0
Heliimonas	0	0	0	0	2	0
Clostridium_sensu_stricto_9	0	1	0	0	0	1
Croceicoccus	0	1	0	0	0	1
Geobacillus	1	1	0	0	0	0
Mastigocladopsis_PCC-10914	0	0	0	2	0	0
Neorhizobium	0	0	0	2	0	0
Chroococcidiopsis_PCC_7203	0	0	1	0	0	1
Sediminispirochaeta	0	0	2	0	0	0
Aestuariicella	1	0	0	1	0	0
DSSD61	0	1	1	0	0	0
Subsaxibacter	0	1	0	1	0	0
Corallococcus	0	0	1	0	0	1
Candidatus_Accumulibacter	0	2	0	0	0	0
Pseudarcobacter	0	0	1	1	0	0
oc32	1	0	1	0	0	0
Sanguibacter	0	0	2	0	0	0
Diaphorobacter	0	0	1	1	0	0
Flexivirga	0	0	2	0	0	0
Pleurocapsa_PCC-7319	0	0	0	2	0	0
UCG-009	0	0	1	0	0	1
Crassaminicella	2	0	0	0	0	0
Aestuariimicrobium	2	0	0	0	0	0
Vogesella	2	0	0	0	0	0
Oscillatoria_SAG_1459-8	0	0	0	0	0	2
Phytoactinopolyspora	0	0	0	0	1	0
Streptomycetaceae	0	0	0	0	1	0
PeH15	0	0	1	0	0	0
Methanocorpusculum	0	0	1	0	0	0
Ornatilinea	0	0	0	1	0	0
GWA2-38-13b	0	0	0	1	0	0
Verrucomicrobium	0	0	1	0	0	0
Ruminococcaceae	0	0	0	0	1	0
Georgfuchsia	0	0	0	1	0	0
Subgroup_12	0	0	0	0	0	1
Mesotoga	0	0	0	1	0	0
Falsibacillus	1	0	0	0	0	0
Corticibacterium	1	0	0	0	0	0
Aliterella	0	1	0	0	0	0
Candidatus_Nitrotoga	0	0	1	0	0	0
Jeotgalibacillus	1	0	0	0	0	0
Taonella	0	0	1	0	0	0
Proteocatella	0	0	1	0	0	0
Methylophilaceae	0	0	0	1	0	0
Methyloversatilis	0	1	0	0	0	0
Gracilibacillus	1	0	0	0	0	0
Asinibacterium	0	0	0	0	1	0
Alicyclobacillus	1	0	0	0	0	0
ADurb.Bin120	0	0	1	0	0	0
Thermomonosporaceae	0	1	0	0	0	0
Bacteroidales_UCG-001	0	0	1	0	0	0
Patulibacter	0	1	0	0	0	0
Shewanella	0	0	1	0	0	0
Roseburia	0	0	0	0	1	0
Pirellulaceae	1	0	0	0	0	0
PS-B29	0	0	1	0	0	0
Tsukamurella	0	0	0	1	0	0
Halobacillus	1	0	0	0	0	0
Hyalangium	0	0	0	1	0	0
Cyclobacteriaceae	0	0	0	1	0	0
Roseococcus	1	0	0	0	0	0
Azohydromonas	0	1	0	0	0	0
Catenibacterium	1	0	0	0	0	0
Fermentibacteraceae	0	0	1	0	0	0
Family_XIII_UCG-001	0	0	0	0	1	0
Anaerotruncus	1	0	0	0	0	0
Neo-b11	0	0	0	0	0	1
Baia	1	0	0	0	0	0
Oscillospira	0	1	0	0	0	0
Garciella	0	0	0	1	0	0
Phycisphaera	0	0	1	0	0	0
0319-7L14	0	0	0	0	1	0
Chitinibacter	0	0	1	0	0	0
Clostridium_sensu_stricto_2	0	0	0	1	0	0
UCG-001	0	0	0	1	0	0
Polyangiaceae	0	0	0	1	0	0
SM1A07	0	0	1	0	0	0
CHAB-XI-27	0	0	0	0	1	0
UCG-003	0	0	0	0	1	0
Anaerobacillus	0	0	1	0	0	0
Propionicicella	0	0	1	0	0	0
Xanthomonadaceae	0	1	0	0	0	0
Telmatocola	0	0	0	1	0	0
R76-B128	0	0	1	0	0	0
Collinsella	0	1	0	0	0	0
Group_1.1c	1	0	0	0	0	0
Diplosphaera	0	0	0	0	1	0
Dorea	0	1	0	0	0	0
Mitsuokella	1	0	0	0	0	0
CG2-30-50-142	0	1	0	0	0	0
Kibdelosporangium	0	0	0	1	0	0
Methylarcula	0	0	1	0	0	0
Victivallaceae	0	0	1	0	0	0
Subdoligranulum	0	0	1	0	0	0
Oligosphaera	0	0	1	0	0	0
Candidatus_Liptonbacteria	0	0	0	1	0	0
Oligotropha	0	0	0	1	0	0
Erysipelatoclostridium	0	1	0	0	0	0
Candidatus_Competibacter	0	0	1	0	0	0
Viridibacillus	0	1	0	0	0	0
Gallicola	0	0	0	0	1	0
Polymorphum	0	0	0	1	0	0
Megasphaera	0	0	0	0	1	0
CM1G08	0	0	0	1	0	0
Acrocarpospora	0	1	0	0	0	0
Candidatus_Jidaibacter	0	1	0	0	0	0
Chitinophagaceae	0	0	0	1	0	0
Sh765B-TzT-35	0	0	1	0	0	0
JG30a-KF-32	0	1	0	0	0	0
Xenophilus	0	0	0	0	1	0
Pleomorphomonas	0	1	0	0	0	0
Parabacteroides	0	0	1	0	0	0
Cryptosporangium	0	1	0	0	0	0
Lactivibrio	0	0	1	0	0	0
028H05-P-BN-P5	0	0	0	1	0	0
Aliidongia	0	0	1	0	0	0
Aquimonas	0	0	0	1	0	0
V2072-189E03	0	0	1	0	0	0
Lachnospiraceae_FCS020_group	0	0	0	0	1	0
Alkalibacter	0	0	0	1	0	0
Izhakiella	0	1	0	0	0	0
Tropicimonas	0	0	0	0	1	0
Desulforhabdus	1	0	0	0	0	0
RumEn_M2	0	0	0	1	0	0
Piscibacillus	0	1	0	0	0	0
Prevotellaceae_UCG-001	0	1	0	0	0	0
Sutterella	1	0	0	0	0	0
Prevotellaceae_UCG-003	0	0	0	0	0	1
WC3-116	0	0	0	1	0	0
Desertibacter	0	0	0	0	0	1
113B434	0	1	0	0	0	0
Eubacterium	0	1	0	0	0	0
Desulfuromonadia	0	0	0	1	0	0
Candidatus_Spechtbacteria	0	0	1	0	0	0
Pseudobacteriovorax	1	0	0	0	0	0
Gluconacetobacter	0	0	1	0	0	0
Pleurocapsa_PCC-7327	0	0	0	1	0	0
Sarcina	0	0	1	0	0	0
sediment-surface35	1	0	0	0	0	0
Rhodanobacteraceae	0	0	0	1	0	0
Herbiconiux	0	0	0	0	1	0
Stappia	0	1	0	0	0	0
Trichlorobacter	0	0	1	0	0	0
Xylanibacillus	0	0	1	0	0	0
RBG-16-55-12	0	0	1	0	0	0
Moorella	0	0	1	0	0	0
Pseudoclostridium	0	1	0	0	0	0
Crenothrix	0	0	1	0	0	0
DTB120	0	0	1	0	0	0
GZKB124	0	0	1	0	0	0
Longimicrobium	0	0	1	0	0	0
Chungangia	0	0	1	0	0	0
KIST-JJY010	0	1	0	0	0	0
Methylibium	0	1	0	0	0	0
OLB17	0	0	1	0	0	0
Ornithinibacter	0	1	0	0	0	0
GCA-900066575	0	0	0	0	1	0
Candidatus_Hepatincola	0	0	1	0	0	0
Schumannella	0	1	0	0	0	0
Clostridium_sensu_stricto_16	0	1	0	0	0	0
Acetobacteroides	0	0	1	0	0	0
Falsirhodobacter	0	0	1	0	0	0
Methylovulum	0	0	1	0	0	0
Zhizhongheella	0	1	0	0	0	0
Nitratireductor	0	1	0	0	0	0
Thioclava	0	0	1	0	0	0
Butyricicoccus	0	0	1	0	0	0
Marvinbryantia	0	0	1	0	0	0
Gallionella	0	0	1	0	0	0
AT-s3-28	0	1	0	0	0	0
CPla-4_termite_group	0	0	1	0	0	0
Spirochaetota	0	0	1	0	0	0
Candidatus_Xenohaliotis	0	0	1	0	0	0
Zeaxanthinibacter	0	0	1	0	0	0
Wangella	0	1	0	0	0	0
Desulfuromusa	0	0	1	0	0	0
Gimesia	0	0	1	0	0	0
Caedibacter	1	0	0	0	0	0
Thermosporothrix	0	0	0	0	0	1
Methylotenera	0	0	1	0	0	0
Finegoldia	0	0	1	0	0	0
Procabacter	0	1	0	0	0	0
Herbaspirillum	0	0	0	0	1	0
Desulfuribacillus	0	1	0	0	0	0
Actinosynnema	0	0	0	1	0	0
MD2902-B12	0	0	1	0	0	0
Micropepsaceae	0	0	1	0	0	0
Melittangium	1	0	0	0	0	0
Owenweeksia	0	0	0	0	1	0
Nitrococcus	0	0	0	0	1	0
Jonesia	0	0	1	0	0	0
FFCH16767	0	0	0	0	0	1
Paracraurococcus	0	0	0	1	0	0
AT-s16	0	0	0	1	0	0
Fischerella_PCC-9339	0	0	1	0	0	0
GTL1	0	0	0	1	0	0
Lelliottia	0	0	0	0	0	1
Thiorhodococcus	0	0	0	1	0	0
Dysgonomonadaceae	0	0	0	1	0	0
Papillibacter	0	0	0	0	1	0
TPD-58	0	0	0	1	0	0
Jiangella	0	0	0	0	1	0
Aerococcus	1	0	0	0	0	0
TSAC18	0	0	0	1	0	0
Byssovorax	0	0	0	1	0	0
Caenimonas	0	0	0	1	0	0
Atopostipes	0	0	0	1	0	0
Pyrinomonas	0	0	0	1	0	0
Sediminihabitans	0	0	0	0	1	0
UASB-TL25	0	0	0	0	1	0
Syntrophococcus	0	0	0	0	1	0
Calditrichaceae	0	0	0	1	0	0
Candidatus_Methanoperedens	0	0	0	1	0	0
Hathewaya	0	0	0	1	0	0
Candidatus_Roizmanbacteria	0	0	0	0	1	0
Oligoflexales	0	0	0	0	1	0
C86	0	0	0	0	0	1
Sphingorhabdus	0	0	0	0	0	1
UTBCD1	0	0	0	0	1	0
Desulfobacca	0	0	0	1	0	0
Saccharofermentans	0	0	0	1	0	0
Pasteuria	0	0	0	0	0	1
Raoultibacter	0	0	0	0	1	0
EV818SWSAP88	1	0	0	0	0	0
Parasutterella	1	0	0	0	0	0
Omnitrophales	0	0	0	0	1	0
MSBL7	0	0	0	0	1	0
Scytonema_VB-61278	0	0	0	1	0	0
Limnohabitans	0	0	0	0	1	0
Micavibrio	1	0	0	0	0	0
ODP123	1	0	0	0	0	0
Starkeya	0	0	0	0	1	0
4-29-1	0	0	0	0	1	0
Mycoavidus	1	0	0	0	0	0
Christensenellaceae	0	0	0	0	0	1
Elsteraceae	0	0	0	0	1	0
AAP99	0	0	0	1	0	0
Candidatus_Finniella	0	0	0	0	0	1
Weissella	0	0	0	1	0	0
Anaerofustis	1	0	0	0	0	0
Oribacterium	1	0	0	0	0	0
Silanimonas	0	0	0	1	0	0
Armatimonas	1	0	0	0	0	0
TG-45	0	0	0	1	0	0
Magnetospirillum	0	0	0	1	0	0
F9P41300-M23	1	0	0	0	0	0
32-520	0	0	0	1	0	0
Salana	0	0	0	0	0	1
Myceligenerans	0	0	0	0	1	0
Uliginosibacterium	1	0	0	0	0	0
Fusobacterium	1	0	0	0	0	0
Aminobacterium	0	0	0	1	0	0
Mobilicoccus	0	0	0	0	0	1
TM7x	0	0	0	1	0	0
